# Supplementary material
Source: ML conference proceedings conference paper supplement (https://openreview.net/forum?id=qYDBgSeAlU)
Supplement: supplementary_material [file Replicable_Distribution_Testing_full.pdf › Replicable_Distribution_Testing_full.pdf]

---

# Replicable Distribution Testing

---

Anonymous Author(s)

Affiliation

Address

email

## Abstract

1 We initiate a systematic investigation of distribution testing in the framework of  
2 algorithmic replicability. Specifically, given independent samples from a collection  
3 of probability distributions, the goal is to characterize the sample complexity  
4 of replicably testing natural properties of the underlying distributions. On the  
5 algorithmic front, we develop new replicable algorithms for testing closeness and  
6 independence of discrete distributions. On the lower bound front, we develop  
7 a new methodology for proving sample complexity lower bounds for replicable  
8 testing that may be of broader interest. As an application of our technique, we  
9 establish near-optimal sample complexity lower bounds for replicable uniformity  
10 testing—answering an open question from prior work—and closeness testing.

## 11 1 Introduction

12 Algorithmic replicability has emerged as a fundamental notion in modern statistics and machine  
13 learning to ensure consistency of algorithm outputs in the presence of randomness in input datasets.  
14 The formal notion of replicability, proposed in [34], is as follows.

15 **Definition 1.1** (Replicability [34]). *A randomized algorithm  $\mathcal{A} : \mathcal{X}^n \mapsto \mathcal{Y}$  is  $\rho$ -replicable if for all  
16 distributions  $\mathbf{p}$  on  $\mathcal{X}$ ,  $\Pr_{r, T, T'}(\mathcal{A}(T; r) = \mathcal{A}(T'; r)) \geq 1 - \rho$ , where  $T, T'$  are i.i.d. samples taken  
17 from  $\mathbf{p}$ , and  $r$  denotes the internal randomness of the algorithm  $\mathcal{A}$ .*

18 Since its introduction, replicability has been considered in the context of a wide range of machine  
19 learning tasks, including multi-arm bandits [29], clustering [30], reinforcement learning [37, 28], half-  
20 space learning [36], and high-dimension statistics [33]. A related line of work explored the connection  
21 between replicability and other algorithmic stability notions such as differential privacy [11, 41], total  
22 variation indistinguishability [35], global stability [22], and one-way perfect generalization [11, 41].

23 In this work, we initiate a systematic study of replicability in distribution testing, a central area  
24 in property testing and statistics that aims to ascertain whether an unknown distribution satisfies a  
25 certain property or is “far” from satisfying that property. Specifically, we focus on replicable testing  
26 of discrete distributions in total variation distance, which encompasses canonical problems such as  
27 uniformity/identity testing, closeness testing, and independence testing. Formally, we have:

28 **Definition 1.2** ( $(\epsilon, \rho)$ -replicable testing of property  $\mathcal{P}$ ). *Let  $\mathcal{P}$  be a property consisting of  $k$ -  
29 tuples of distributions, and  $\epsilon, \rho \in (0, 1/4)$ . Given sample access to a collection of distribu-  
30 tions  $\mathbf{p}^{(1)}, \dots, \mathbf{p}^{(k)}$ , we say a randomized algorithm  $\mathcal{A}$  solves  $(\epsilon, \rho)$ -replicable  $\mathcal{P}$ -testing if  $\mathcal{A}$   
31 is  $\rho$ -replicable and can distinguish between the following cases with probability at least  $1 - \rho$ :  
32 completeness case  $(\mathbf{p}^{(1)}, \dots, \mathbf{p}^{(k)}) \in \mathcal{P}$  or soundness case  $k^{-1} \sum_{i=1}^k d_{TV}(\mathbf{p}^{(i)}, \mathbf{q}^{(i)}) \geq \epsilon$  for all  
33 tuples  $(\mathbf{q}^{(1)}, \dots, \mathbf{q}^{(k)}) \in \mathcal{P}$ . In particular, (a) uniformity testing over the domain  $[n]$  corresponds to  
34 the case that  $k = 1$ , and  $\mathcal{P}$  consists of only the uniform distribution over  $[n]$ ; (b) closeness testing  
35 over the domain  $[n]$  corresponds to the case that  $k = 2$ , and  $\mathcal{P}$  consists of all pairs of distributions  
36  $(\mathbf{p}, \mathbf{p})$  over  $[n]$ ; (c) independence testing over domain  $[n_1] \times [n_2]$  corresponds to the case that  $k = 1$ ,  
37 and  $\mathcal{P}$  consists of all product distributions over that domain.*

After the pioneering works formulating this field [6, 31] from a TCS perspective, a line of work has given efficient testers (without the replicability requirement) achieving information theoretically optimal sample complexities for the aforementioned problems; see [42, 44] for uniformity/identity testing, [6, 45, 10, 21] for closeness testing, and [7, 2, 24] for independence testing. More broadly, substantial progress has been made on testing a wide range of natural properties; see, e.g., [8, 9, 1, 38, 25, 17, 23, 18, 20, 19] for a sample of works, and [43, 16, 15] for surveys on the topic.

Despite the maturity of the field of distribution testing, the relevant literature contains only a single prior work addressing replicability: a recent paper by [40] designs replicable testers for the task of uniformity testing (and identity testing via a standard reduction technique), and demonstrates that the sample complexity is nearly tight within a *restricted* class of algorithms. Specifically, their techniques are insufficient to establish lower bounds against *general* uniformity testers, or to design sample-optimal replicable testers for other distribution testing problems.

An instructive parallel arises in the context of differentially private (DP) distribution testing, where similar challenges in designing testers with extra stability constraints have been addressed; see [13, 4, 3, 5]. Although generic reductions from DP to replicable algorithms exist, see, e.g., [12], they incur polynomial overheads in sample complexity. This motivates our goal: to develop a principled and fine-grained understanding of the sample complexity cost of replicability in distribution testing.

## 1.1 Our results

Our first main contribution is a new lower bound framework for replicable distribution testing that yields unconditional lower bounds against all testers, without additional assumptions. As a first application of our framework, we show that the replicable uniformity tester proposed in [40] is indeed nearly optimal, thus settling the main open problem left by their work.

**Theorem 1.3** (Sample Complexity of Replicable Uniformity Testing). *The sample complexity of  $(\varepsilon, \rho)$ -replicable uniformity testing over  $[n]$  is  $\tilde{\Theta}(\sqrt{n}\varepsilon^{-2}\rho^{-1} + \varepsilon^{-2}\rho^{-2})$ .*

We believe that the framework is broadly applicable to establishing lower bounds for other replicable distribution testing problems. In particular, as an additional application, we derive the following tight lower bound for replicable closeness testing.

**Theorem 1.4** (Lower Bound of Replicable Closeness Testing). *The sample complexity of  $(\varepsilon, \rho)$ -replicable closeness testing over  $[n]$  is at least  $\tilde{\Omega}(n^{2/3}\varepsilon^{-4/3}\rho^{-2/3} + \sqrt{n}\varepsilon^{-2}\rho^{-1} + \varepsilon^{-2}\rho^{-2})$ .*

On the algorithmic front, we provide new replicable testers for closeness and independence testing. For closeness testing, we show:

**Theorem 1.5** (Replicable Closeness Tester). *The sample complexity of  $(\varepsilon, \rho)$ -replicable closeness testing over  $[n]$  is at most  $\tilde{O}(n^{2/3}\varepsilon^{-4/3}\rho^{-2/3} + \sqrt{n}\varepsilon^{-2}\rho^{-1} + \varepsilon^{-2}\rho^{-2})$ .*

Note that Theorem 1.5, together with Theorem 1.4, give a tight characterization of the sample complexity of replicable closeness testing up to polylogarithmic factors. For independence testing, we show that:

**Theorem 1.6** (Replicable Independence Tester). *The sample complexity of  $(\varepsilon, \rho)$ -replicable independence testing over  $[n_1] \times [n_2]$  for  $n_1 \geq n_2$  is at most  $\tilde{O}\left(\frac{n_1^{2/3}n_2^{1/3}}{\rho^{2/3}\varepsilon^{4/3}} + \frac{\sqrt{n_1n_2}}{\rho\varepsilon^2} + \frac{1}{\varepsilon^2\rho^2}\right)$ .<sup>1</sup>*

Perhaps surprisingly, our upper bounds point to an intriguing conceptual connection between replicability and distribution testing in the *high success probability regime*. In particular, the functional forms of the sample complexities of (non-replicable) uniformity, closeness, and independence testing up to error probability  $\delta$  have been characterized in [26, 27] to be precisely the sample complexity upper bounds of the corresponding replicable testing problems after replacing  $\rho^{-1}$  with  $\sqrt{\log(1/\delta)}$ .<sup>2</sup> Moreover, all known replicable distribution testers (including ours) leverage the statistics developed

<sup>1</sup>While our replicable closeness tester runs in linear time in sample size, our replicable independence tester requires polynomial runtime. This is due to an extra “averaging” operation applied to make the statistic more stable (see Section 1.2). We leave it for future work to explore whether its runtime can be further improved.

<sup>2</sup>For example, the sample complexity of high probability closeness testing has been shown to be  $\Theta\left(n^{2/3}\varepsilon^{-4/3}\log^{1/3}(1/\delta) + \sqrt{n}\varepsilon^{-2}\sqrt{\log(1/\delta)} + \varepsilon^{-2}\log(1/\delta)\right)$  by [27]

in the context of high probability distribution testers. We leave it as an interesting open problem whether there exists generic reduction from high-probability testers to replicable ones or vice versa. Lastly, with this connection in mind, it is a plausible conjecture that our sample complexity upper bound for replicable independence testing is nearly optimal. We leave this as an open question.

## 1.2 Technical Overview

We start with a description of our lower bound framework, which is the main technical contribution of this work, followed by our upper bounds.

**Replicable Testing Lower Bounds** In what follows, we will sketch the overall framework for showing lower bounds against replicable uniformity and closeness testing, and point to the specific lemmas used in deriving the uniformity testing lower bound for concreteness. Let  $\mathcal{A}$  be a randomized tester for the testing problem that uses significantly fewer samples than the target lower bound. Our end goal is to show that if  $\mathcal{A}$  satisfies the correctness requirements of the corresponding testing problem, then  $\mathcal{A}$  cannot be replicable. Towards this goal, we begin with the same reasoning steps as the ones in [40]. In particular, we construct a meta-distribution  $\mathcal{M}_\xi$ , parametrized by  $\xi \in [0, \varepsilon]$ , over potential hard instances of the testing problem such that (i)  $\mathcal{M}_0$  and  $\mathcal{M}_\varepsilon$  correspond to instances that should be respectively accepted and rejected by the tester, and (ii) it should be hard to distinguish a random instance from  $\mathcal{M}_\xi$  versus a random instance from  $\mathcal{M}_{\xi+\varepsilon\rho}$ .

After that, using the same argument as [40], we can deduce that if we sample  $\xi \sim \mathcal{U}([0, \varepsilon])$ , then the average acceptance probability of the tester under  $\mathcal{M}_\xi$ , i.e.,  $\mathbb{E}_{\mathbf{p} \sim \mathcal{M}_\xi} [\Pr_{S \sim \mathbf{p}} [\mathcal{A} \text{ accepts } S]]$ , will be close to  $1/2$  with probability at least  $\Omega(\rho)$  over the randomness of  $\xi$ . See Lemma 3.5 for the formal statement. If  $\mathcal{M}_\xi$  were to contain just a single distribution instance  $\mathbf{p}_\xi$ , then the statement would directly imply that  $\mathcal{A}$  is not replicable under  $\mathbf{p}_\xi$ , and this would conclude the lower bound argument. Of course,  $\mathcal{M}_\xi$  is in reality a meta-distribution over (exponentially) many different instances by design (see Definition 3.2). To overcome this issue, [40] takes advantage of the fact that the instances from the meta-distribution are identical up to permutation of the domain elements. As such, if one makes the *additional assumption* that the output of the tester is invariant up to domain relabeling (in other words, the tester is *symmetric*), then it is not hard to show that the acceptance probability of the tester under each individual distribution must be the same as the overall averaged acceptance probability under  $\mathcal{M}_\xi$ , and the proof is complete.

Our proof circumvents this difficulty with a fundamentally different approach that allows us to avoid making *any* assumptions on the tester. As one of our main technical contributions, we show that even when the tester is *not* symmetric, the acceptance probability under a random choice of  $\mathbf{p} \sim \mathcal{M}_\xi$  must nonetheless concentrate around its expectation, as long as the tester is still moderately replicable under  $\mathbf{p}$ , i.e., replicable with probability  $1 - 1/\text{polylog}(n)$ . See Lemma 3.6 for the formal statement. Towards this goal, consider the joint distribution of two random sample sets  $S, S'$  generated as follows: pick a random distribution  $\mathbf{p} \sim \mathcal{M}_\xi$  and then sample  $S, S'$  independently from  $\mathcal{M}_\xi$ . The distribution of  $S'$  conditioned on  $S$  then naturally defines a random walk  $\mathbf{RW}_\xi$  on the space of all possible sample sets. For convenience, denote by  $\mathbf{RW}_\xi^k(\mathbf{p})$  the distribution over sample sets  $\bar{S}$  obtained by first sampling  $T \sim \mathbf{p}$  and then performing  $k$  steps of the random walk. Lying in the heart of our proof is the following two structural claims: (1) for most  $\mathbf{p} \sim \mathcal{M}_\xi$ , the acceptance probability of the tester under  $\bar{S} \sim \mathbf{RW}_\xi^{\text{polylog}(n)}(\mathbf{p})$  is roughly the same as that of under  $S \sim \mathbf{p}$ . (2) the random walk  $\mathbf{RW}_\xi$  has mixing time at most  $\text{polylog}(n)$ . Combining the two claims gives that the acceptance probability under most  $\mathbf{p} \sim \mathcal{M}_\xi$  must be roughly the same, as the acceptance probability under the stationary distribution of the random walk (which by construction is exactly equal to the expected acceptance probability under  $\mathcal{M}_\xi$ ).

It then remains for us to establish these two claims. The proof of (1) mainly follows from the definition of the random walk, and the assumption that the tester is moderately replicable. See Lemma 3.9 and its proof for details. The canonical way for showing (2) is to bound from below the eigenvalue gaps of the transition matrix of the random walk. To analyze this, we note that after a careful use of Poissonization (see Definition 3.1 for the definition of Poisson sampling), we can make  $\mathbf{RW}_\xi$  a product of  $n$  independent random walks. Formally, since the number of samples is Poissonized, the sample frequency of each bucket is independent, even conditioned on the choice of distribution  $\mathbf{p} \sim \mathcal{M}_\xi$ . It then suffices for us to bound the mixing time of much simpler random walks on the sample frequencies of each individual domain element. Fortunately, the eigenvalue gap of this random walk can be analyzed conveniently using elementary properties of the Poisson distributions.

See Lemma 3.8 and its proof for details. The formal proofs of Theorem 1.3 and the relevant lemmas are deferred to Appendix E.

Lastly, the same framework also applies to the proof of Theorem 1.5. The main change needed is to replace the meta-distribution  $\mathcal{M}_\xi$  to be the standard hard instance for closeness testing. See, e.g., [45, 21, 24] for the construction of the hard instance. The formal proof can be found in Appendix F.

**Replicable Testing Upper Bounds** We begin with the observation that many testers from the literature share the following nice form: compute a test statistic  $Z$  and compare it to a threshold  $R$ . Usually, the analysis (without replicability requirements) involves showing that  $\mathbb{E}[Z] = 0$  in the completeness case,  $\mathbb{E}[Z] \gg R$  in the soundness case, and  $\text{Var}[Z]$  is at most a small constant multiple of  $R^2$ . For testers of this form, we can employ the same strategy as the one used in [40] to transform them into replicable testers: we can compute the same test statistic  $Z$ , and then compare it to a *randomly chosen* threshold  $r$  between 0 and  $R/2$ . In particular, if we further have that  $\text{Var}[Z] \ll R^2 \rho^2$  (at the cost of taking more samples), the variance bound on  $Z$  implies that  $Z$  computed with different sample sets drawn from the same underlying distribution are likely to be close to each other. Consequently, the values of  $Z$  in two runs are unlikely to be separated by a randomly chosen  $r$ , ensuring replicability.

For closeness testing, the high probability tester from [27] satisfies exactly the conditions needed, and in turn yields our replicable tester after combining it with the random thresholding strategy. The formal proof of Theorem 1.5 is given in Appendix C.

Designing good testers for replicable independence testing turns out to be significantly more involved, as even the known high probability independence testers do not satisfy the required variance bounds within our sample complexity budget. In its essence, the bottleneck lies in an extra randomized “flattening” procedure employed by the tester, which significantly increases the overall variance of the final statistic computed. Specifically, the procedure utilizes a random subset of the input samples to “split” domain elements with large mass into sub-elements. This step aims to ensure that there will be no extremely heavy elements after the procedure (otherwise, the tester may fail to satisfy even the basic correctness requirements). To show correctness of their tester, [27] demonstrated that (1) the flattening procedure preserves the product/non-product structure of the original distribution, and (2) the variance of the final test statistic *conditioned on* the flattening samples (and some other technical conditions) is small. Notably, a bound on the total variance of the test statistic  $Z$  is not needed in their context, as the above two properties suffice for them to show upper/lower bounds on  $Z$  in the completeness/soundness cases. Yet, when replicability is of concern, we do need to show that  $Z$  concentrates around a small interval. As a result, the lack of a good bound on the total variance (as compared to just conditional variance) of the final test statistic turns out to be a major technical obstacle in converting the high probability tester into a replicable one. In fact, the randomness in using different samples for flattening purposes can easily cause the total variance of  $Z$  to be much larger than the conditional variance.

To overcome this difficulty, we leverage the following idea from [5] (in the context of differentially private testing): to make a test statistic computed with internal randomness more stable, we can replace it with the *averaged* version of it. In particular, we apply this idea to the statistic  $Z$  computed by the high probability independence statistic, and obtain a new averaged statistic  $Z_a$ —essentially, the expected value of  $Z$  averaged over all possible partitions of the input samples into flattening samples and testing samples (see Definition 2.6 for the formal definition). As our main technical lemma, we show that the total variance of this averaged test statistic  $Z_a$  can be bounded from above by  $N$ —the expected value of the number of *non-singleton* samples, i.e., the testing samples which still collide with another testing sample after the flattening procedure (see Lemma 2.9). At a high level, our argument uses an Efron-Stein style inequality that bounds the variance by the sum of the expected square differences of the test statistic  $Z_a$  caused by removal of each individual sample. Suppose that there are in total  $m$  samples and the probability of selecting a sample for flattening is  $p$ . We then proceed by a case analysis. If the sample removed is used for computing the final test statistic, we show that the (non-averaged) test statistic  $Z$  will only be different if the sample also happens to be a singleton sample after flattening, which happens with probability roughly  $O(N/m)$ . If the sample is selected for flattening, we show that removing it can change the test statistic  $Z$  by at most  $N$  divided by the number of flattening samples, which is roughly  $O(pm)$ . Consequently, the contribution to the variance of  $Z_a$  in this case is at most  $(p N/(mp))^2 \leq N^2/m^2$ , which is also  $O(N/m)$ .

It remains for us to control the non-singleton sample count  $N$ . Fortunately, [27] already established sharp bounds on the expected value of  $N$ , when  $\mathbf{p}$  is known to be a product distribution. This then

motivates us to run a pre-test to check whether  $\mathbb{E}[N]$  is within a constant factor of the desired bound, before computing the averaged independence statistic  $Z_a$ . In particular, we consider the statistic  $N_a$ , defined similarly to  $Z_a$  as the expected non-singleton sample count  $N$  averaged over the random choice of the flattening sample set, and use an almost identical argument to show that  $\text{Var}[N_a]$  can also be bounded by  $O(\mathbb{E}[N])$  (see Lemma 2.11). Equipped with the variance bound, it is not hard to show that comparing  $N_a$  with an appropriately chosen random threshold yields a tester that replicably determines whether the magnitude of  $\mathbb{E}[N]$  is within a constant factor of the bound it should satisfy when  $\mathbf{p}$  is a product distribution. If we pass this test, we can then proceed to apply the main test, which compares  $Z_a$  to a randomized threshold. This concludes our proof sketch. The relevant lemma statements can be found in Section 2. The proofs of Theorem 1.6 and the relevant lemmas are deferred to Appendix B.

**Preliminaries** Let  $[n] = \{1, \dots, n\}$ . We use  $n$  to denote domain size and  $m$  to denote sample complexity. We use bold letters (e.g.  $\mathbf{p}, \mathbf{q}$ ) to denote distributions or measures and  $\mathbf{p}(i)$  to denote the mass of  $i$  under  $\mathbf{p}$ . Let  $\text{Poi}(\lambda)$  denote a Poisson distribution with parameter  $\lambda$  and  $\text{PoiS}(m, \mathbf{p})$  denote  $m' \sim \text{Poi}(m)$  i.i.d. samples from  $\mathbf{p}$ . Let  $\text{Bernoulli}(\alpha)$  denote a Bernoulli distribution with parameter  $\alpha$ . Let  $\mathcal{U}([a, b])$  denote the uniform distribution over interval  $[a, b]$  where  $a \leq b$ . For any distribution  $\mathbf{p}$ , let  $\mathbf{p}^{\otimes m}$  denote  $m$  i.i.d. samples from  $\mathbf{p}$ . We use “algorithm” and “tester” interchangeably. For a multiset  $S$  of samples, we denote the set of all elements appearing in  $S$  by  $\text{supp}(S)$ .

## 2 Replicable Independence Testing Algorithm

In this section, we give our replicable independence tester. At a high level, we compute the same statistic used by the high probability independence tester from [27], but average over the internal randomness of the tester to enhance replicability.

Our starting point is the (randomized) flattening technique developed in [24, 27] that helps decrease the  $\ell_2$  norm of input distributions while maintaining the properties to be tested in total variation distance. The original description is as follows. First, one draws a set of samples  $X$ , and randomly partitions  $X$  into a flattening sample set, and a testing sample set. Next, one uses the flattening samples to determine the number of sub-bins for each original domain element, and then randomly assigns original testing samples to the sub-bins. For our analysis, it is more convenient to consider an equivalent random process, where we randomly sort all samples, partition them into flattening and testing samples, and make two testing samples be in the same sub-bin if and only if they are originally from the same bin and there are no flattening samples from the same bin between them. The formal description is as follows.

**Definition 2.1.** Let  $X = \{X_1, \dots, X_m\}$  be a multiset of samples over  $[n]$ , and  $F \in \{0, 1\}^m$  be a binary vector. Then the randomized flattening procedure  $X^f := \{X_\ell^f\}_{\ell: F_\ell=0} \leftarrow \text{Flatten}(\{X_\ell\}_{\ell=1}^m; F)$  is as follows. (1) Assign a random order  $\sigma$  to the samples. (2) For each sample  $X_\ell$ , count the number of samples  $X_{\ell'}$  before it according to  $\sigma$  such that  $X_{\ell'} = X_\ell$  and  $F_{\ell'} = 1$ . Denote the number as  $f_\ell$ . (3) For each  $\ell$  such that  $F_\ell = 0$ , set  $X_\ell^f \leftarrow (X_\ell, f_\ell)$ . Moreover, given a parameter  $\alpha \in (0, 1)$ , we denote by  $\text{Flatten}(X; \alpha)$  the randomized sample set obtained from  $X^f \leftarrow \text{Flatten}(X; F)$ , where  $F \sim \text{Bernoulli}(\alpha)^{\otimes m}$ .

In independence testing, we need to perform the flattening operation on the marginals of multi-dimensional distribution independently. For clarity, we formalize this operation below.

**Definition 2.2.** Let  $\alpha, \beta \in (0, 1)$ , and  $P = \{P_\ell = (X_\ell, Y_\ell)\}_{\ell=1}^m$  be a multiset of samples over  $[n_1] \times [n_2]$ . Then the multi-dimensional flattening operation  $P^f := \{P_\ell^f\} \leftarrow \text{Flatten}(\{P_\ell\}_{\ell=1}^m; \alpha, \beta)$  is as follows. (1) Choose  $F^x \sim \text{Bernoulli}(\alpha)^{\otimes m}$  and  $F^y \sim \text{Bernoulli}(\beta)^{\otimes m}$ . (2)  $\{X_\ell^f\}_{\ell: F_\ell^x=0} \leftarrow \text{Flatten}(\{X_\ell\}_{\ell=1}^m; F^x)$ ,  $\{Y_\ell^f\}_{\ell: F_\ell^y=0} \leftarrow \text{Flatten}(\{Y_\ell\}_{\ell=1}^m; F^y)$ . (3) Map  $P_\ell$  to  $P_\ell^f \leftarrow (X_\ell^f, Y_\ell^f)$  if  $F_\ell^x = F_\ell^y = 0$ . When flattening two bags of samples  $A$  and  $B$  together, we denote by  $A^f \cup B^f \leftarrow \text{Flatten}(A \cup B; \alpha, \beta)$ , where  $A^f$  ( $B^f$ , resp.) contains all elements mapped from  $A$  ( $B$ , resp.).

Another key idea behind the tester from [27] is to use the samples from  $\mathbf{p}$  to simulate samples from another product distribution  $\mathbf{q}$  that equals to the product of the marginals of  $\mathbf{p}$ . In particular, a sample from  $\mathbf{q}$  can be simulated by taking two samples from  $\mathbf{p}$ , and combining the first coordinate of the first sample to the second coordinate of the second sample. Hence, we can readily assume that we have sample access to both  $\mathbf{p}$  and  $\mathbf{q}$ .



**Definition 2.3** (Product of Marginals). Given a distribution  $\mathbf{p}$  over  $[n_1] \times [n_2]$ , we say  $\mathbf{q}$  is the product of marginals of  $\mathbf{p}$  if the marginals of  $\mathbf{q}$  agree with that of  $\mathbf{p}$  and  $\mathbf{q}$  is a product distribution.

Given the samples from the original distribution, and the ones from the product of the marginals, the final step of the tester from [27] is to compute the closeness test statistic, which we reiterate below.

**Definition 2.4** (Closeness Statistic). Given two bags of samples  $S_p, S_q$  over some finite discrete domain, the closeness statistic  $Z_C(S_p, S_q)$  is defined as follows. (1) For each sample in  $S_p \cup S_q$ , mark it independently with probability  $1/2$ . (2) For  $i \in \text{supp}(S_p \cup S_q)$ , let  $T_i^{p_0}, T_i^{q_0}$  be the number of times the element  $i$  appears marked in  $S_p, S_q$ , and  $T_i^{p_1}, T_i^{q_1}$  be the corresponding counts of the unmarked samples. (3) Compute  $Z_C(S_p, S_q) \leftarrow |T_i^{p_0} - T_i^{q_0}| + |T_i^{p_1} - T_i^{q_1}| - |T_i^{p_0} - T_i^{p_1}| - |T_i^{q_0} - T_i^{q_1}|$ .

A useful fact of this test statistic is that any singleton sample does not contribute to its value.

**Fact 1.** Consider two sets of samples  $S_p, S_q$  over some finite discrete domain. Assume that  $P$  is a singleton sample among  $S_p \cup S_q$ . It holds that  $\mathbb{E}[Z_C(S_p, S_q)] = \mathbb{E}[Z_C(S_p \setminus \{P\}, S_q \setminus \{P\})]$ , where the randomness is over the internal randomness of the test statistic  $Z$ .

We are now ready to state the tester from [27], which forms the building block of our replicable independence tester.

---

**Algorithm 1** INDEPENDENCESTATS

---

**Input:** a sample set  $S_p$  from the unknown distribution  $\mathbf{p}$  over  $[n_1] \times [n_2]$ , where  $n_1 \geq n_2$ , and another sample set  $S_q$  from  $\mathbf{q}$ , the product of marginals of  $\mathbf{p}$ .

**Parameters:** domain sizes  $n_1 > n_2$ , tolerance  $\epsilon \in (0, 1/4)$ , replicability  $\rho \in (0, 1/4)$ .

**Output:** A test statistic related to whether these samples came from an independent distribution.

- 1: Set  $m = \tilde{\Theta}\left(n_1^{2/3} n_2^{1/3} \rho^{-2/3} \epsilon^{-4/3} + \sqrt{n_1 n_2} \rho^{-1} \epsilon^{-2} + \rho^{-2} \epsilon^{-2}\right)$ .
  - 2: Set  $\alpha = \min(n_1/(100m), 1/100)$ ,  $\beta = n_2/(100m)$ .
  - 3: Compute the flattened samples  $S_p^f \cup S_q^f \leftarrow \text{Flatten}(S_p \cup S_q; \alpha, \beta)$ .
  - 4: Abort and return 0 if  $|S_p| - |S_p^f| > 10n_1$  or  $|S_q| - |S_q^f| > 10n_2$ .
  - 5: Sample  $\ell, \ell' \sim \text{Poi}(m)$ . Abort and return 0 if  $\ell > |S_p^f|$  or  $\ell' > |S_q^f|$ .
  - 6: Keep only the first  $\ell$  samples of  $S_p^f$  and only the first  $\ell'$  samples of  $S_q^f$ .
  - 7: Compute and return the closeness test statistic  $Z_C(S_p^f, S_q^f)$ .
- 

A basic property we need is that the final test statistic computed has a wide expectation gap.

**Lemma 2.5** (Expectation Gap of Independence Statistics; Section 3.2 and Claim 4.14 of [27]). Let  $\mathbf{p}$  be some unknown distribution over  $[n_1] \times [n_2]$ ,  $\mathbf{q}$  be the product of marginals of  $\mathbf{p}$ , and  $m$  be defined as in Line 1 of INDEPENDENCESTATS. Let  $S_p, S_q$  be samples from  $\mathbf{p}, \mathbf{q}$  respectively with size  $|S_p| = |S_q| = 100m$ , and  $Z \leftarrow \text{INDEPENDENCESTATS}(S_p, S_q)$ . Define  $G := \min(\epsilon m, m^2 \epsilon^2 / (n_1 n_2), m^{3/2} \epsilon^2 / \sqrt{n_1 n_2})$ . If  $\mathbf{p}$  is a product distribution, then  $\mathbb{E}[Z] \leq C_{I_1} G$ ; If  $\mathbf{p}$  is  $\epsilon$ -far from any product distribution in TV distance, then  $\mathbb{E}[Z] > C_{I_2} G$  for some constants  $C_{I_1} < C_{I_2}$ .

To make the final test statistic computed by INDEPENDENCESTATS more replicable, we consider a new test statistic  $Z_a$  computed by averaging over the internal randomness of INDEPENDENCESTATS.

**Definition 2.6** (Averaged Independence Statistic). Let  $S_p, S_q$  be samples over  $[n_1] \times [n_2]$ . We define  $Z_a(S_p, S_q)$  to be the expected value of INDEPENDENCESTATS( $S_p, S_q$ ) averaged over the internal randomness of INDEPENDENCESTATS.

An important quantity in analyzing the concentration of the above new statistic is the concept of non-singleton sample counts.

**Definition 2.7** (Non-singleton Sample Count). Let  $S$  be a set of samples over some finite discrete domain. We define the non-singleton sample count  $N(S)$  as the total number of samples within  $S$  that collide with another sample.

Specifically, we focus on the non-singleton sample count of the flattened sample sets  $S_p^f, S_q^f$  constructed by INDEPENDENCESTATS.

281 **Definition 2.8** (Non-singleton Sample Count of Flattened Samples). *Let  $S_p, S_q$  be two arbitrary sets*  
 282 *of samples over  $[n_1] \times [n_2]$ . Consider the two random (truncated) flattened sample sets  $S_p^f, S_q^f$  con-*  
 283 *structed by INDEPENDENCESTATS( $S_p, S_q$ ) on Line 7<sup>3</sup>. We define  $N_a(S_p, S_q) := \mathbb{E}[N(S_p^f \cup S_q^f)]$ ,*  
 284 *where the expectation is over the internal randomness of INDEPENDENCESTATS.*

285 Our main insight is that we can bound the variance of the new statistic  $Z_a(S_p, S_q)$  by the expected  
 286 value of  $N_a(S_p, S_q)$ . This key technical lemma is as follows. The proof is deferred to Appendix B.

287 **Lemma 2.9** (Bound Variance of Averaged Independence Statistic in Expected Non-Singleton Sample  
 288 Count). *Let  $\mathbf{p}$  be a distribution over  $[n_1] \times [n_2]$ , and  $\mathbf{q}$  be the product of marginals of  $\mathbf{p}$ . Let*  
 289  *$S_p, S_q$  be samples from  $\mathbf{p}, \mathbf{q}$  respectively. Consider the averaged independence statistics  $Z_a(S_p, S_q)$ ,*  
 290 *and the averaged non-singleton sample count  $N_a(S_p, S_q)$ . Then it holds that  $\text{Var}[Z_a(S_p, S_q)] \leq$*   
 291  *$O(\log^3(n_1 n_2)) \mathbb{E}[N_a(S_p, S_q)]$ , where the randomness is over the samples  $S_p, S_q$ .*

292 It then remains for us to control  $N_a(S_p, S_q)$ . Fortunately, the expected value of the non-singleton  
 293 count has already been shown to be small by [27] when the underlying distribution  $\mathbf{p}$  is known to be  
 294 a product distribution.

295 **Lemma 2.10** (Expected Non-singleton Sample Count under Product Distribution, Lemma 4.9 of  
 296 [27]). *Let  $m \in \mathbb{Z}_+$ ,  $\alpha, \beta \in (0, 1)$  be defined as in Line 1 and Line 2 from INDEPENDENCESTATS*  
 297 *respectively. Let  $S$  be samples from a product distribution  $\mathbf{q}$  over  $[n_1] \times [n_2]$  with  $|S| = 100m$ .*  
 298 *Consider the random variable  $N(S^f)$ , where  $S^f \leftarrow \text{Flatten}(S; \alpha, \beta)$ . Then there exists a universal*  
 299 *constant  $C_N$  such that  $\mathbb{E}[N(S^f)] \leq C_N \max(m^2/(n_1 n_2), m/n_2)$ , where the randomness is over*  
 300 *the internal randomness of Flatten( $\cdot$ ) as well as the samples.*

301 This motivates a two-stage testing strategy: we can first test that the expected value of  $N_a(S_p \cup S_q)$   
 302 is sufficiently small, and then compute the averaged statistic  $Z_a(S_p, S_q)$ . To ensure replicability of  
 303 the first testing stage, we also need to control the variance of the averaged non-singleton sample  
 304 count  $N_a(S_p \cup S_q)$ . Fortunately, the variance can be bounded in the same way as the variance of the  
 305 averaged independence statistic  $Z_a(S_p \cup S_q)$ . See Appendix B for the detailed argument.

306 **Lemma 2.11** (Bound Variance of Averaged Non-Singleton Sample Count). *Let  $\mathbf{p}$  be a distribution*  
 307 *over  $[n_1] \times [n_2]$ , and  $\mathbf{q}$  be the product of marginals of  $\mathbf{p}$ . Let  $S_p, S_q$  be samples from  $\mathbf{p}, \mathbf{q}$  respec-*  
 308 *tively. Consider the random variable  $N_a(S_p, S_q)$  defined as in Definition 2.8. Then it holds that*  
 309  *$\text{Var}[N_a(S_p, S_q)] \leq O(\log^3(n_1 n_2)) \mathbb{E}[N_a(S_p, S_q)]$ , where the randomness is over  $S_p, S_q$ .*

310 Using Lemma 2.11, we show that we can replicably test whether  $\mathbb{E}[N_a(S_p, S_q)]$  is on the order of  
 311  $\max(m^2/(n_1 n_2), m/\min(n_1, n_2))$  by simply drawing random sample sets  $S_p, S_q$ , (approximately)  
 312 computing  $N_a(S_p, S_q)$ , and then comparing it with an appropriately chosen random threshold.

313 We are now ready to present our full independence tester. The full analysis and proof of Theorem 1.6  
 314 can be found in Appendix B.

---

#### Algorithm 2 REPINDEPENDENCESTATS

---

**Input:** sample access to an unknown distribution  $\mathbf{p}$  over  $[n_1] \times [n_2]$

**Parameter:**  $\epsilon \in (0, 1/4)$  tolerance,  $\rho \in (0, 1/4)$  replicability.

**Output:** Whether  $\mathbf{p}$  is a product distribution.

- 1: Let  $m$  be defined as in Line 1 of INDEPENDENCESTATS.
  - 2:  $\tilde{S}_p \leftarrow 100m$  samples from  $\mathbf{p}$ , and  $\tilde{S}_q \leftarrow 100m$  samples from  $\mathbf{q}$ , the product of marginals of  $\mathbf{p}$ .
  - 3: Estimate  $N_a(\tilde{S}_p, \tilde{S}_q)$  (see Definition 2.8) up to error  $o(1)$  by running INDEPENDENCESTATS( $\tilde{S}_p, \tilde{S}_q$ ) with fresh randomness for sufficiently many times.
  - 4: Draw  $r \sim \mathcal{U}([2C_N, 100C_N])$ , where  $C_N$  is the constant from Lemma 2.10.
  - 5: Reject if (estimated)  $N_a(\tilde{S}_p, \tilde{S}_q) > r \max(m^2/(n_1 n_2), m/n_2)$ .
  - 6:  $S_p \leftarrow 100m$  samples from  $\mathbf{p}$ , and  $S_q \leftarrow 100m$  samples from  $\mathbf{q}$ , the product of marginals of  $\mathbf{p}$ .
  - 7: Estimate  $Z_a(S_p, S_q)$  (see Definition 2.6) up to error  $o(1)$  by running INDEPENDENCESTATS( $S$ ) with fresh randomness for sufficiently many times.
  - 8: Draw  $r \sim \mathcal{U}([C_{I_1}, C_{I_2}])$ , where  $C_{I_1}, C_{I_2}$  are constants from Lemma 2.5.
  - 9: Reject if (estimated)  $Z_a(S_p, S_q) > r \min(\epsilon m, m^2 \epsilon^2/(n_1 n_2), m^{3/2} \epsilon^2/\sqrt{n_1 n_2})$ . Otherwise, accept.
- 

<sup>3</sup>We think of the two sets as being empty if the algorithm aborts before reaching Line 7

### 3 Lower Bounds for Replicable Uniformity Testing

In this section, we show the sample complexity lower bound  $\tilde{\Omega}(\epsilon^{-2}\rho^{-2} + \sqrt{n}\epsilon^{-2}\rho^{-1})$  for  $(\epsilon, \rho)$ -replicable uniformity testing over  $[n]$ . The  $\tilde{\Omega}(\epsilon^{-2}\rho^{-2})$  part follows from the lower bound in Lemma 7.2 of [34] for the naive case when  $n = 2$ , i.e. distinguishing a fair from biased coin so we focus on establishing the lower bound  $\tilde{\Omega}(\sqrt{n}\epsilon^{-2}\rho^{-1})$ . As such, we assume that  $\tilde{o}(\sqrt{n}\epsilon^{-2}\rho^{-1}) = \epsilon^{-2}\rho^{-2}$ , which implies the implicit bound  $\sqrt{n}\epsilon^{-2}\rho^{-1} = \tilde{o}(n\epsilon^{-2})$ , throughout this section. To begin with, we apply a common technique called Poissonization. Specifically, it reduces the task into showing lower bounds against *Poissonized* testers allowing a more flexible sampling process from non-negative measures in place of the standard testers that are restricted to take a fixed number of samples from distributions. Formally, the Poissonized tester is defined as follows.

**Definition 3.1** (Poissonized Tester and Poisson Sampling). *Given a non-negative measure  $\mathbf{p}$  over  $[n]$  and an integer  $m$ , the Poisson sampling model samples a number  $m' \sim \text{Poi}(m\|\mathbf{p}\|_1)$ , and draws  $m'$  samples from  $\mathbf{p}/\|\mathbf{p}\|_1$ . Let  $T \in \mathbb{R}^n$  be the random vector where  $T_i$  counts the number of element  $i$  seen among the samples. We write  $\text{PoiS}(m, \mathbf{p})$  to denote the distribution of the random vector  $T$ . We say  $\mathcal{A}$  is a Poissonized tester with sample complexity  $m$  if it takes as input  $T \sim \text{PoiS}(m, \mathbf{p})$ .*

Based on this, we can relax the hard instances for uniformity testing to be in general non-negative measures over  $[n]$ . The definition below describes the meta-distribution  $\mathcal{M}_\xi$  over non-negative measures over  $[n]$  that forms the family of hard instances for uniformity testing.

**Definition 3.2** (Uniformity Hard Instance). *For  $\xi \in [0, \epsilon]$ , we define  $\mathcal{M}_\xi$  to be the distribution over non-negative measures  $\mathbf{p}_\xi$  defined as follows:  $\mathbf{p}_\xi(i) = \frac{1+\xi}{n}$  with probability  $\frac{1}{2}$  and  $\frac{1-\xi}{n}$  otherwise. The hard instance  $\mathcal{H}_U$  for replicable uniformity testing is given by  $\mathbf{p}_\xi \sim \mathcal{M}_\xi$ , where  $\xi \in [0, \epsilon]$ .*

Using a standard minimax-style argument from [34], it suffices to give a lower bound for deterministic algorithms (fixed random seed  $r$ ) on a random instance from  $\mathcal{H}_U$ . More specifically, the task can be reduced to showing that any deterministic algorithm that satisfies *distributional correctness* with respect to  $(\mathcal{M}_0, \mathcal{M}_\epsilon)$  cannot at the same time satisfy *distributional replicability* with respect to  $\mathcal{H}_U$ .

**Definition 3.3** (Distributional Correctness/Replicability). *Let  $\mathcal{M}_0, \mathcal{M}_\epsilon, \mathcal{H}$  be meta-distributions over non-negative measures over  $[n]$ . Let  $\mathcal{A}$  be a Poissonized tester with sample complexity  $m$ . (1) We say  $\mathcal{A}$  is  $\delta$ -correct with respect to  $(\mathcal{M}_0, \mathcal{M}_\epsilon)$  if  $\Pr_{r, \mathbf{p} \sim \mathcal{M}_0, T \sim \text{PoiS}(m, \mathbf{p})} [\mathcal{A}(T) = \text{Accept}] \geq 1 - \delta$  and  $\Pr_{r, \mathbf{p} \sim \mathcal{M}_\epsilon, T \sim \text{PoiS}(m, \mathbf{p})} [\mathcal{A}(T) = \text{Accept}] \leq \delta$ . (2) We say  $\mathcal{A}$  is  $\rho$ -replicable with respect to  $\mathcal{H}$  if it holds that  $\Pr_{\mathbf{p} \sim \mathcal{H}, T, T' \sim \text{PoiS}(m, \mathbf{p})} [\mathcal{A}(T) \neq \mathcal{A}(T')] \leq \rho$ .*

We defer an elaboration on the reduction from showing lower bounds against deterministic Poissonized testers to those against randomized standard testers to Appendix D. Equipped with this reduction, the proof of Theorem 1.3 can then be reduced to the following main result of this section:

**Proposition 3.4.** *Let  $\mathcal{M}_\xi$  be the meta-distribution parametrized by  $\xi \in [0, \epsilon]$  defined as in Definition 3.2,  $\mathcal{A}$  be a deterministic Poissonized tester with sample complexity  $m = \tilde{o}(\sqrt{n}\epsilon^{-2}\rho^{-1})$ . If  $\mathcal{A}$  is 0.1-correct with respect to  $\mathcal{M}_0$  and  $\mathcal{M}_\epsilon$ , then  $\mathcal{A}$  cannot be  $\rho \log^{-2} n$ -replicable with respect to  $\mathcal{H}_U$ .*

From now on, we focus on the proof of Proposition 3.4. Since  $\mathcal{A}$  is assumed to be a deterministic tester, we note that  $\Pr_{T, T' \sim \text{PoiS}(m, \mathbf{p})} [\mathcal{A}(T) \neq \mathcal{A}(T')] \geq 0.1$  holds as long as the acceptance probability of  $\mathcal{A}(T)$  lies in the interval  $[1/3, 2/3]$ . For convenience, we define the function  $\text{Acc}_m(\mathbf{p}, \mathcal{A}) := \Pr_{T \sim \text{PoiS}(m, \mathbf{p})} [\mathcal{A}(T) = \text{Accept}]$ . It then suffices for us to show

$$\Pr_{\mathbf{p} \sim \mathcal{H}_U} [\text{Acc}_m(\mathbf{p}, \mathcal{A}) \in (\log^{-2} n, 1 - \log^{-2} n)] \geq \rho. \quad (1)$$

Recall that  $\mathcal{H}_U$  is defined to first select  $\xi$  randomly from  $[0, \epsilon]$ , and then sample from the distribution family  $\mathcal{M}_\xi$ . Hence, towards showing Equation (1), we will first show the intermediate result that the average acceptance probability  $\mathbb{E}_{\mathbf{p} \sim \mathcal{M}_\xi} [\text{Acc}_m(\mathbf{p}, \mathcal{A})]$  is close to  $1/2$  with probability at least  $\rho$  over the random choice of  $\xi$ . At a high-level, we observe that the expected acceptance probability function must evaluate to exactly  $1/2$  for some  $\xi \in (0, \epsilon)$  due to continuity, and then draws tools from information theory to show that the function is in general  $0.1(\epsilon\rho)^{-1}$ -Lipschitz with respect to the parameter  $\xi$ . The argument is similar to the one employed in [40], and so we defer it to Appendix E.1. The formal statement is given below.

**Lemma 3.5.** *Let  $\mathcal{A}$  be a deterministic Poissonized tester that is 0.1-correct w.r.t.  $\mathcal{M}_0$  and  $\mathcal{M}_\epsilon$  and  $m = \tilde{o}(\sqrt{n}\epsilon^{-2}\rho^{-1})$ , then  $\Pr_{\xi \sim \mathcal{U}([0, \epsilon])} [\mathbb{E}_{\mathbf{p} \sim \mathcal{M}_\xi} [\text{Acc}_m(\mathbf{p}, \mathcal{A})] \in (1/3, 2/3)] \geq \rho$ .*



To conclude the proof of Equation (1), we then relate the acceptance probability  $\text{Acc}_m(\mathbf{p})$  for a random  $\mathbf{p} \sim \mathcal{M}_\xi$  to its expected value. To achieve the goal, the authors from [40] exploit the assumption that the underlying tester  $\mathcal{A}$  is symmetric. Our main technical contribution here is that we managed to remove this assumption. In particular, we show that even if the underlying tester is not symmetric, the acceptance probability  $\text{Acc}_m(\mathbf{p})$  will nonetheless satisfy strong concentration properties as long as the tester is still moderately replicable with respect to  $\mathcal{M}_\xi$ .

**Lemma 3.6** (Concentration of Acceptance Probabilities). *Let  $\xi \in (0, \varepsilon)$  and  $\mathcal{A}$  be a deterministic tester that is  $\log^{-2} n$ -replicable with respect to  $\mathcal{M}_\xi$ . Assume that  $m = \tilde{o}(n\varepsilon^{-2})$ . Then it holds  $\Pr_{\mathbf{p} \sim \mathcal{M}_\xi} (|\text{Acc}_m(\mathbf{p}, \mathcal{A}) - \mathbb{E}_{\mathbf{p}' \sim \mathcal{M}_\xi} [\text{Acc}_m(\mathbf{p}', \mathcal{A})]| > \frac{1}{4}) \leq \frac{1}{2}$ .*

The formal proof is deferred to Appendix E.2. At a high level, we construct a random walk on the sample space whose stationary distribution is the same as  $T \sim \mathbf{p}$ , where  $\mathbf{p} \sim \mathcal{M}_\xi$ .

**Definition 3.7** (Sample Random Walk). *Let  $\mathcal{M}$  be a meta-distribution over non-negative measures over  $[n]$ , and  $m \in \mathbb{Z}_+$ . The sample random walk  $\mathbf{RW}_{m, \mathcal{M}}$  is defined on the graph whose vertex set is  $\mathbb{N}^n$  (where each vertex corresponds to a sample count vector  $T$ ) and transitions  $(T_1, T_2)$  are defined by the conditional distribution of  $T_2$  given  $T_1$  induced by the joint distribution given by the following process: (1) Choose  $\mathbf{p} \sim \mathcal{M}$ . (2)  $T_1, T_2$  are sampled independently from  $\text{PoiS}(m, \mathbf{p})$ . Moreover, for a sample count vector  $T$ , we denote by  $\mathbf{RW}_{m, \mathcal{M}}^k(T)$  the random variable representing the outcome after  $k$  steps of the random walk  $\mathbf{RW}_{m, \mathcal{M}}$  from  $T$ . For a non-negative measure  $\mathbf{p}$  over  $[n]$ , we denote by  $\mathbf{RW}_{m, \mathcal{M}}^k(\mathbf{p})$  the distribution of  $\mathbf{RW}_{m, \mathcal{M}}^k(T)$ , where  $T \sim \text{PoiS}(m, \mathbf{p})$ .*

For simplicity, we write  $\mathbf{RW}_{m, \xi} := \mathbf{RW}_{m, \mathcal{M}_\xi}$  where  $\mathcal{M}_\xi$  is the meta-distribution given in Definition 3.2. The random walk turns out to mix very rapidly.

**Lemma 3.8.** *Let  $\xi \in (0, \varepsilon)$  and  $m = \tilde{o}(n\varepsilon^{-2})$ . Then  $\mathbf{RW}_{m, \xi}$  has mixing time  $\tau(\delta) = O(\log(n/\delta))$ .*

The proof is deferred to Appendix E.2. To see that the random walk is fast mixing, we observe that  $\mathbf{RW}_{m, \xi}$  is a product of  $n$  independent random walks induced by the following process on the sample counts  $t_1, t_2 \in \mathbb{N}$  for each domain element: 1) choose  $\lambda \sim \{\lambda_+ := (1 + \xi)/n, \lambda_- := (1 - \xi)/n\}$  and 2)  $t_1, t_2$  are sampled independently from  $\text{PoiS}(m, \lambda)$ . We show that the total variation distance between  $\text{PoiS}(m, \lambda_+)$  and  $\text{PoiS}(m, \lambda_-)$  is not too large, so that most initial states  $t_1$  are about as equally likely to be generated by  $\text{PoiS}(m, \lambda_+)$  as to be generated by  $\text{PoiS}(m, \lambda_-)$ . Consequently, the distribution of  $\lambda$  conditioned on  $t_1$  will be close to the uniform distribution over  $\lambda_+, \lambda_-$ , further implying that the conditional distribution of the next state  $t_2$  will be close to the stationary distribution.

The fast mixing time of the random walk then allows us to approximate the stationary distribution by  $\mathbf{RW}_{m, \xi}^k(\mathbf{p})$  for some  $k = \text{polylog}(n)$ . As a result, we can write  $|\mathbb{E}_{T \sim \text{PoiS}(m, \mathbf{p})} [\mathcal{A}(T)] - \mathbb{E}_{\mathbf{p}' \sim \mathcal{M}_\xi} [\mathbb{E}_{T \sim \text{PoiS}(m, \mathbf{p}')} [\mathcal{A}(T)]]| \approx |\mathbb{E}_{T \sim \text{PoiS}(m, \mathbf{p})} [\mathcal{A}(T)] - \mathbb{E}_{T' \sim \mathbf{RW}_{m, \xi}^k(\mathbf{p})} [\mathcal{A}(T')]|$ . Since  $\mathcal{A}$  is replicable with respect to  $\mathcal{M}_\xi$ , we can use the triangle inequality and some simple algebraic manipulation to further bound the above by the sum of the terms

$$\Pr_{T \sim \mathbf{RW}_{m, \xi}^{i-1}(\mathbf{p}), T' \sim \mathbf{RW}_{m, \xi}^i(\mathbf{p})} [\mathcal{A}(T) \neq \mathcal{A}(T')] , \quad (2)$$

where  $i \in [k]$ . While it is challenging to establish a uniform bound on the terms for an arbitrary non-negative measure  $\mathbf{p}$ , it turns out that this is not so hard for an “average”  $\mathbf{p} \sim \mathcal{M}_\xi$ . At a high level, if we consider the expected value of the disagreement probability in Equation (2) over  $\mathbf{p} \sim \mathcal{M}_\xi$ , the term simplifies to  $\Pr_{T \sim \pi_\xi, T' \sim \mathbf{RW}_{m, \xi}(T)} [\mathcal{A}(T) \neq \mathcal{A}(T')] = \Pr_{\mathbf{p} \sim \mathcal{M}_\xi, T, T' \sim \text{PoiS}(m, \mathbf{p})} [\mathcal{A}(T) \neq \mathcal{A}(T')]$ , where the equality follows from the definition of the stationary distribution  $\pi_\xi$  of the random walk. Therefore, the expected value of the disagreement probability cannot be too large as long as the tester  $\mathcal{A}$  is still moderately replicable with respect to the meta-distribution  $\mathcal{M}_\xi$ . The formal statement is given below, and the proof is deferred to Appendix E.3.

**Lemma 3.9** (Indistinguishability of Random Walk Step). *Let  $\mathcal{A}$  be a deterministic uniformity tester and  $\mathbf{p} \sim \mathcal{M}_\xi$ . Define  $\kappa := \Pr_{\mathbf{p} \sim \mathcal{M}_\xi, T, T' \sim \text{PoiS}(m, \mathbf{p})} [\mathcal{A}(T) \neq \mathcal{A}(T')]$ . With probability at least  $1/2$ , it holds that  $\sum_{i=1}^k \Pr_{T \sim \mathbf{RW}_{m, \xi}^{i-1}(\mathbf{p}), T' \sim \mathbf{RW}_{m, \xi}(T)} [\mathcal{A}(T) \neq \mathcal{A}(T')] < 2k\kappa$ , where the randomness is over choice of  $\mathbf{p} \sim \mathcal{M}_\xi$ .*

The proof of Lemma 3.6 then largely follows from Lemmas 3.8 and 3.9. After that, the proof of Proposition 3.4 follows from Lemmas 3.5 and 3.6. See Appendix E.4 for the formal arguments.

## References

- [1] J. Acharya, H. Das, A. Jafarpour, A. Orlitsky, and S. Pan. Competitive closeness testing. *Journal of Machine Learning Research - Proceedings Track*, 19:47–68, 2011. 1
- [2] J. Acharya, C. Daskalakis, and G. Kamath. Optimal testing for properties of distributions. *Advances in Neural Information Processing Systems*, 28, 2015. 1
- [3] J. Acharya, Z. Sun, and H. Zhang. Differentially private testing of identity and closeness of discrete distributions. *Advances in Neural Information Processing Systems*, 31, 2018. 1
- [4] M. Aliakbarpour, I. Diakonikolas, and R. Rubinfeld. Differentially private identity and equivalence testing of discrete distributions. In *International Conference on Machine Learning*, pages 169–178. PMLR, 2018. 1
- [5] M. Aliakbarpour, I. Diakonikolas, D. Kane, and R. Rubinfeld. Private testing of distributions via sample permutations. *Advances in Neural Information Processing Systems*, 32, 2019. 1, 1.2
- [6] T. Batu, L. Fortnow, R. Rubinfeld, W. D. Smith, and P. White. Testing that distributions are close. In *41st Annual Symposium on Foundations of Computer Science*, 2000. 1
- [7] T. Batu, E. Fischer, L. Fortnow, R. Kumar, R. Rubinfeld, and P. White. Testing random variables for independence and identity. In *Proceedings 42nd IEEE Symposium on Foundations of Computer Science*, pages 442–451. IEEE, 2001. 1
- [8] T. Batu, S. Dasgupta, R. Kumar, and R. Rubinfeld. The complexity of approximating entropy. In *ACM Symposium on Theory of Computing*, pages 678–687, 2002. 1
- [9] T. Batu, R. Kumar, and R. Rubinfeld. Sublinear algorithms for testing monotone and unimodal distributions. In *ACM Symposium on Theory of Computing*, pages 381–390, 2004. 1
- [10] T. Batu, L. Fortnow, R. Rubinfeld, W. D. Smith, and P. White. Testing closeness of discrete distributions. *Journal of the ACM (JACM)*, 60(1):1–25, 2013. 1
- [11] M. Bun, M. Gaboardi, M. Hopkins, R. Impagliazzo, R. Lei, T. Pitassi, S. Sivakumar, and J. Sorrell. Stability is stable: Connections between replicability, privacy, and adaptive generalization. In *Proceedings of the 55th Annual ACM Symposium on Theory of Computing, STOC*, pages 520–527. ACM, 2023. doi: 10.1145/3564246.3585246. URL <https://doi.org/10.1145/3564246.3585246>. 1
- [12] M. Bun, M. Gaboardi, M. Hopkins, R. Impagliazzo, R. Lei, T. Pitassi, S. Sivakumar, and J. Sorrell. Stability is stable: Connections between replicability, privacy, and adaptive generalization. In *Proceedings of the 55th Annual ACM Symposium on Theory of Computing*, pages 520–527, 2023. 1
- [13] B. Cai, C. Daskalakis, and G. Kamath. Priv’it: Private and sample efficient identity testing. In *International Conference on Machine Learning*, pages 635–644. PMLR, 2017. 1
- [14] C. Canonne. A short note on poisson tail bounds, 2019. URL <https://github.com/ccanonne/probabilitydistributiontoolbox/blob/master/poissonconcentration.pdf>. A.1
- [15] C. Canonne. Topics and techniques in distribution testing: A biased but representative sample. *Foundations and Trends® in Communications and Information Theory*, 19(6):1032–1198, 2022. 1
- [16] C. L. Canonne. A survey on distribution testing: Your data is big. but is it blue? *Theory of Computing*, pages 1–100, 2020. 1
- [17] C. L. Canonne, I. Diakonikolas, D. M. Kane, and A. Stewart. Testing bayesian networks. In *Proceedings of the 30th Conference on Learning Theory, COLT 2017*, pages 370–448, 2017. 1
- [18] C. L. Canonne, I. Diakonikolas, D. M. Kane, and A. Stewart. Testing conditional independence of discrete distributions. In *Proceedings of the 50th Annual ACM SIGACT Symposium on Theory of Computing, STOC 2018, Los Angeles, CA, USA, June 25-29, 2018*, pages 735–748. ACM, 2018. doi: 10.1145/3188745.3188756. URL <https://doi.org/10.1145/3188745.3188756>. 1
- [19] C. L. Canonne, I. Diakonikolas, D. M. Kane, and S. Liu. Near-optimal bounds for testing histogram distributions. *CoRR*, abs/2207.06596, 2022. doi: 10.48550/arXiv.2207.06596. URL <https://doi.org/10.48550/arXiv.2207.06596>. Conference version in NeurIPS’22. 1

- [20] C. L. Canonne, A. Jain, G. Kamath, and J. Li. The price of tolerance in distribution testing. In *Conference on Learning Theory*, volume 178 of *Proceedings of Machine Learning Research*, pages 573–624. PMLR, 2022. 1
- [21] S. Chan, I. Diakonikolas, P. Valiant, and G. Valiant. Optimal algorithms for testing closeness of discrete distributions. In *Proceedings of the twenty-fifth annual ACM-SIAM symposium on Discrete algorithms*, pages 1193–1203. SIAM, 2014. 1, 1.2
- [22] Z. Chase, B. Chornomaz, S. Moran, and A. Yehudayoff. Local borsuk-ulam, stability, and replicability. *arXiv preprint arXiv:2311.01599*, 2023. 1
- [23] C. Daskalakis, N. Dikkala, and G. Kamath. Testing ising models. In *Proceedings of the Twenty-Ninth Annual ACM-SIAM Symposium on Discrete Algorithms, SODA 2018, 2018*, pages 1989–2007. SIAM, 2018. 1
- [24] I. Diakonikolas and D. M. Kane. A new approach for testing properties of discrete distributions. In *2016 IEEE 57th Annual Symposium on Foundations of Computer Science (FOCS)*, pages 685–694. IEEE, 2016. 1, 1.2, 2
- [25] I. Diakonikolas, D. M. Kane, and V. Nikishkin. Optimal algorithms and lower bounds for testing closeness of structured distributions. In *2015 IEEE 56th Annual Symposium on Foundations of Computer Science*, pages 1183–1202. IEEE, 2015. 1
- [26] I. Diakonikolas, T. Gouleakis, J. Peebles, and E. Price. Sample-optimal identity testing with high probability. In *45th International Colloquium on Automata, Languages, and Programming (ICALP 2018)*, pages 41–1. Schloss Dagstuhl–Leibniz-Zentrum für Informatik, 2018. 1.1
- [27] I. Diakonikolas, T. Gouleakis, D. M. Kane, J. Peebles, and E. Price. Optimal testing of discrete distributions with high probability. In *Proceedings of the 53rd Annual ACM SIGACT Symposium on Theory of Computing*, pages 542–555, 2021. 1.1, 2, 1.2, 2, 2, 2, 2.5, 2, 2.10, C, C.2, C.3
- [28] E. Eaton, M. Hussing, M. Kearns, and J. Sorrell. Replicable reinforcement learning. *Advances in Neural Information Processing Systems*, 36, 2023. 1
- [29] H. Esfandiari, A. Kalavasis, K. A. A. Krause, V. Mirrokni, and G. Veleghkas. Replicable bandits. *arXiv preprint arXiv:2210.01898*, 2022. 1
- [30] H. Esfandiari, A. Karbasi, V. Mirrokni, G. Veleghkas, and F. Zhou. Replicable clustering. *Advances in Neural Information Processing Systems*, 36:39277–39320, 2023. 1
- [31] O. Goldreich and D. Ron. On testing expansion in bounded-degree graphs. *Studies in Complexity and Cryptography. Miscellanea on the Interplay between Randomness and Computation: In Collaboration with Lidor Avigad, Mihir Bellare, Zvika Brakerski, Shafi Goldwasser, Shai Halevi, Tali Kaufman, Leonid Levin, Noam Nisan, Dana Ron, Madhu Sudan, Luca Trevisan, Salil Vadhan, Avi Wigderson, David Zuckerman*, pages 68–75, 2011. 1
- [32] V. Guruswami. Rapidly mixing markov chains: A comparison of techniques (A survey). *CoRR*, abs/1603.01512, 2016. URL <http://arxiv.org/abs/1603.01512>. A.2
- [33] M. Hopkins, R. Impagliazzo, D. Kane, S. Liu, and C. Ye. Replicability in high dimensional statistics. In *2024 IEEE 65th Annual Symposium on Foundations of Computer Science (FOCS)*, pages 1–8. IEEE, 2024. 1
- [34] R. Impagliazzo, R. Lei, T. Pitassi, and J. Sorrell. Reproducibility in learning. In *Proceedings of the 54th annual ACM SIGACT symposium on theory of computing*, pages 818–831, 2022. 1, 1.1, 3, 3
- [35] A. Kalavasis, A. Karbasi, S. Moran, and G. Veleghkas. Statistical indistinguishability of learning algorithms. In *International Conference on Machine Learning, ICML, 2023*. 1
- [36] A. Kalavasis, A. Karbasi, K. G. Larsen, G. Veleghkas, and F. Zhou. Replicable learning of large-margin halfspaces. In *Forty-first International Conference on Machine Learning, 2024*. 1
- [37] A. Karbasi, G. Veleghkas, L. Yang, and F. Zhou. Replicability in reinforcement learning. *Advances in Neural Information Processing Systems*, 36:74702–74735, 2023. 1
- [38] R. Levi, D. Ron, and R. Rubinfeld. Testing properties of collections of distributions. In *ICS*, pages 179–194, 2011. 1
- [39] D. Levin, Y. Peres, and E. Wilmer. *Markov Chains and Mixing Times*. American Mathematical Society, 2006. URL <https://pages.uoregon.edu/dlevin/MARKOV/markovmixing.pdf>. A.2, A.10, E.2

- 520 [40] S. Liu and C. Ye. Replicable uniformity testing. *Advances in Neural Information Processing*  
521 *Systems*, 37:32039–32075, 2024. 1, 1.1, 1.2, 3, 3, E.1
- 522 [41] S. Moran, H. Scheffler, and J. Shafer. The bayesian stability zoo. *CoRR*, abs/2310.18428,  
523 2023. doi: 10.48550/ARXIV.2310.18428. URL [https://doi.org/10.48550/arXiv.2310.](https://doi.org/10.48550/arXiv.2310.18428)  
524 [18428](https://doi.org/10.48550/arXiv.2310.18428). 1
- 525 [42] L. Paninski. A coincidence-based test for uniformity given very sparsely sampled discrete data.  
526 *IEEE Transactions on Information Theory*, 54(10):4750–4755, 2008. 1
- 527 [43] R. Rubinfeld. Taming big probability distributions. *XRDS: Crossroads, The ACM Magazine for*  
528 *Students*, 19(1):24–28, 2012. 1
- 529 [44] G. Valiant and P. Valiant. An automatic inequality prover and instance optimal identity testing.  
530 *SIAM Journal on Computing*, 46(1):429–455, 2017. 1
- 531 [45] P. Valiant. Testing symmetric properties of distributions. In *Proceedings of the fortieth annual*  
532 *ACM symposium on Theory of computing*, pages 383–392, 2008. 1, 1.2

## 533 NeurIPS Paper Checklist

### 534 1. Claims

535 Question: Do the main claims made in the abstract and introduction accurately reflect the  
536 paper's contributions and scope?

537 Answer: [Yes]

538 Justification: The abstract and introduction concisely demonstrate our contributions and  
539 scope.

540 Guidelines:

- 541 • The answer NA means that the abstract and introduction do not include the claims  
542 made in the paper.
- 543 • The abstract and/or introduction should clearly state the claims made, including the  
544 contributions made in the paper and important assumptions and limitations. A No or  
545 NA answer to this question will not be perceived well by the reviewers.
- 546 • The claims made should match theoretical and experimental results, and reflect how  
547 much the results can be expected to generalize to other settings.
- 548 • It is fine to include aspirational goals as motivation as long as it is clear that these goals  
549 are not attained by the paper.

### 550 2. Limitations

551 Question: Does the paper discuss the limitations of the work performed by the authors?

552 Answer: [Yes]

553 Justification: Our new lower bound framework for replicable distribution testing does not  
554 require additional assumptions on testers. Our replicable closeness tester with near-optimal  
555 sample complexity runs in linear time in sample size, yet our replicable independence tester  
556 runs in polynomial time in sample size, and we wonder whether one can obtain a more  
557 efficient linear time algorithm. We discuss this in our paper.

558 Guidelines:

- 559 • The answer NA means that the paper has no limitation while the answer No means that  
560 the paper has limitations, but those are not discussed in the paper.
- 561 • The authors are encouraged to create a separate "Limitations" section in their paper.
- 562 • The paper should point out any strong assumptions and how robust the results are to  
563 violations of these assumptions (e.g., independence assumptions, noiseless settings,  
564 model well-specification, asymptotic approximations only holding locally). The authors  
565 should reflect on how these assumptions might be violated in practice and what the  
566 implications would be.
- 567 • The authors should reflect on the scope of the claims made, e.g., if the approach was  
568 only tested on a few datasets or with a few runs. In general, empirical results often  
569 depend on implicit assumptions, which should be articulated.
- 570 • The authors should reflect on the factors that influence the performance of the approach.  
571 For example, a facial recognition algorithm may perform poorly when image resolution  
572 is low or images are taken in low lighting. Or a speech-to-text system might not be  
573 used reliably to provide closed captions for online lectures because it fails to handle  
574 technical jargon.
- 575 • The authors should discuss the computational efficiency of the proposed algorithms  
576 and how they scale with dataset size.
- 577 • If applicable, the authors should discuss possible limitations of their approach to  
578 address problems of privacy and fairness.
- 579 • While the authors might fear that complete honesty about limitations might be used by  
580 reviewers as grounds for rejection, a worse outcome might be that reviewers discover  
581 limitations that aren't acknowledged in the paper. The authors should use their best  
582 judgment and recognize that individual actions in favor of transparency play an impor-  
583 tant role in developing norms that preserve the integrity of the community. Reviewers  
584 will be specifically instructed to not penalize honesty concerning limitations.

### 585 3. Theory assumptions and proofs

586 Question: For each theoretical result, does the paper provide the full set of assumptions and  
587 a complete (and correct) proof?

588 Answer: [Yes]



Justification: All assumptions were clearly provided in the statements and each statement has a corresponding proof in either the main body or appendix.

Guidelines:

- The answer NA means that the paper does not include theoretical results.
- All the theorems, formulas, and proofs in the paper should be numbered and cross-referenced.
- All assumptions should be clearly stated or referenced in the statement of any theorems.
- The proofs can either appear in the main paper or the supplemental material, but if they appear in the supplemental material, the authors are encouraged to provide a short proof sketch to provide intuition.
- Inversely, any informal proof provided in the core of the paper should be complemented by formal proofs provided in appendix or supplemental material.
- Theorems and Lemmas that the proof relies upon should be properly referenced.

#### 4. Experimental result reproducibility

Question: Does the paper fully disclose all the information needed to reproduce the main experimental results of the paper to the extent that it affects the main claims and/or conclusions of the paper (regardless of whether the code and data are provided or not)?

Answer:[NA]

Justification: The paper does not include experiments.

Guidelines:

- The answer NA means that the paper does not include experiments.
- If the paper includes experiments, a No answer to this question will not be perceived well by the reviewers: Making the paper reproducible is important, regardless of whether the code and data are provided or not.
- If the contribution is a dataset and/or model, the authors should describe the steps taken to make their results reproducible or verifiable.
- Depending on the contribution, reproducibility can be accomplished in various ways. For example, if the contribution is a novel architecture, describing the architecture fully might suffice, or if the contribution is a specific model and empirical evaluation, it may be necessary to either make it possible for others to replicate the model with the same dataset, or provide access to the model. In general, releasing code and data is often one good way to accomplish this, but reproducibility can also be provided via detailed instructions for how to replicate the results, access to a hosted model (e.g., in the case of a large language model), releasing of a model checkpoint, or other means that are appropriate to the research performed.
- While NeurIPS does not require releasing code, the conference does require all submissions to provide some reasonable avenue for reproducibility, which may depend on the nature of the contribution. For example
  - (a) If the contribution is primarily a new algorithm, the paper should make it clear how to reproduce that algorithm.
  - (b) If the contribution is primarily a new model architecture, the paper should describe the architecture clearly and fully.
  - (c) If the contribution is a new model (e.g., a large language model), then there should either be a way to access this model for reproducing the results or a way to reproduce the model (e.g., with an open-source dataset or instructions for how to construct the dataset).
  - (d) We recognize that reproducibility may be tricky in some cases, in which case authors are welcome to describe the particular way they provide for reproducibility. In the case of closed-source models, it may be that access to the model is limited in some way (e.g., to registered users), but it should be possible for other researchers to have some path to reproducing or verifying the results.

#### 5. Open access to data and code

Question: Does the paper provide open access to the data and code, with sufficient instructions to faithfully reproduce the main experimental results, as described in supplemental material?

Answer: [NA]

Justification: The paper does not include experiments requiring code.

Guidelines:

- The answer NA means that paper does not include experiments requiring code.
- Please see the NeurIPS code and data submission guidelines (<https://nips.cc/public/guides/CodeSubmissionPolicy>) for more details.
- While we encourage the release of code and data, we understand that this might not be possible, so “No” is an acceptable answer. Papers cannot be rejected simply for not including code, unless this is central to the contribution (e.g., for a new open-source benchmark).
- The instructions should contain the exact command and environment needed to run to reproduce the results. See the NeurIPS code and data submission guidelines (<https://nips.cc/public/guides/CodeSubmissionPolicy>) for more details.
- The authors should provide instructions on data access and preparation, including how to access the raw data, preprocessed data, intermediate data, and generated data, etc.
- The authors should provide scripts to reproduce all experimental results for the new proposed method and baselines. If only a subset of experiments are reproducible, they should state which ones are omitted from the script and why.
- At submission time, to preserve anonymity, the authors should release anonymized versions (if applicable).
- Providing as much information as possible in supplemental material (appended to the paper) is recommended, but including URLs to data and code is permitted.

**6. Experimental setting/details**

Question: Does the paper specify all the training and test details (e.g., data splits, hyper-parameters, how they were chosen, type of optimizer, etc.) necessary to understand the results?

Answer: [NA]

Justification: The paper does not include experiments.

Guidelines:

- The answer NA means that the paper does not include experiments.
- The experimental setting should be presented in the core of the paper to a level of detail that is necessary to appreciate the results and make sense of them.
- The full details can be provided either with the code, in appendix, or as supplemental material.

**7. Experiment statistical significance**

Question: Does the paper report error bars suitably and correctly defined or other appropriate information about the statistical significance of the experiments?

Answer: [NA]

Justification: The paper does not include experiments.

Guidelines:

- The answer NA means that the paper does not include experiments.
- The authors should answer "Yes" if the results are accompanied by error bars, confidence intervals, or statistical significance tests, at least for the experiments that support the main claims of the paper.
- The factors of variability that the error bars are capturing should be clearly stated (for example, train/test split, initialization, random drawing of some parameter, or overall run with given experimental conditions).
- The method for calculating the error bars should be explained (closed form formula, call to a library function, bootstrap, etc.)
- The assumptions made should be given (e.g., Normally distributed errors).
- It should be clear whether the error bar is the standard deviation or the standard error of the mean.
- It is OK to report 1-sigma error bars, but one should state it. The authors should preferably report a 2-sigma error bar than state that they have a 96% CI, if the hypothesis of Normality of errors is not verified.
- For asymmetric distributions, the authors should be careful not to show in tables or figures symmetric error bars that would yield results that are out of range (e.g. negative error rates).

- If error bars are reported in tables or plots, The authors should explain in the text how they were calculated and reference the corresponding figures or tables in the text.

## 8. Experiments compute resources

Question: For each experiment, does the paper provide sufficient information on the computer resources (type of compute workers, memory, time of execution) needed to reproduce the experiments?

Answer: [NA]

Justification: The paper does not include experiments.

Guidelines:

- The answer NA means that the paper does not include experiments.
- The paper should indicate the type of compute workers CPU or GPU, internal cluster, or cloud provider, including relevant memory and storage.
- The paper should provide the amount of compute required for each of the individual experimental runs as well as estimate the total compute.
- The paper should disclose whether the full research project required more compute than the experiments reported in the paper (e.g., preliminary or failed experiments that didn't make it into the paper).

## 9. Code of ethics

Question: Does the research conducted in the paper conform, in every respect, with the NeurIPS Code of Ethics <https://neurips.cc/public/EthicsGuidelines>?

Answer: [Yes]

Justification: Yes, the research conducted in the paper conforms, in every respect, with the NeurIPS Code of Ethics.

Guidelines:

- The answer NA means that the authors have not reviewed the NeurIPS Code of Ethics.
- If the authors answer No, they should explain the special circumstances that require a deviation from the Code of Ethics.
- The authors should make sure to preserve anonymity (e.g., if there is a special consideration due to laws or regulations in their jurisdiction).

## 10. Broader impacts

Question: Does the paper discuss both potential positive societal impacts and negative societal impacts of the work performed?

Answer: [Yes]

Justification: While the paper focuses on foundational research, replicable distribution testing is aimed towards building an algorithmic framework for replicability in scientific analysis, helping build an efficient procedure to verify experimental procedures are followed correctly and building public trust in science. The authors are not aware of any potential negative impacts.

Guidelines:

- The answer NA means that there is no societal impact of the work performed.
- If the authors answer NA or No, they should explain why their work has no societal impact or why the paper does not address societal impact.
- Examples of negative societal impacts include potential malicious or unintended uses (e.g., disinformation, generating fake profiles, surveillance), fairness considerations (e.g., deployment of technologies that could make decisions that unfairly impact specific groups), privacy considerations, and security considerations.
- The conference expects that many papers will be foundational research and not tied to particular applications, let alone deployments. However, if there is a direct path to any negative applications, the authors should point it out. For example, it is legitimate to point out that an improvement in the quality of generative models could be used to generate deepfakes for disinformation. On the other hand, it is not needed to point out that a generic algorithm for optimizing neural networks could enable people to train models that generate Deepfakes faster.
- The authors should consider possible harms that could arise when the technology is being used as intended and functioning correctly, harms that could arise when the technology is being used as intended but gives incorrect results, and harms following from (intentional or unintentional) misuse of the technology.

759           • If there are negative societal impacts, the authors could also discuss possible mitigation  
760           strategies (e.g., gated release of models, providing defenses in addition to attacks,  
761           mechanisms for monitoring misuse, mechanisms to monitor how a system learns from  
762           feedback over time, improving the efficiency and accessibility of ML).

## 763 11. Safeguards

764   Question: Does the paper describe safeguards that have been put in place for responsible  
765   release of data or models that have a high risk for misuse (e.g., pretrained language models,  
766   image generators, or scraped datasets)?

767   Answer: [NA]

768   Justification: The paper poses no such risks.

769   Guidelines:

- 770       • The answer NA means that the paper poses no such risks.
- 771       • Released models that have a high risk for misuse or dual-use should be released with  
772       necessary safeguards to allow for controlled use of the model, for example by requiring  
773       that users adhere to usage guidelines or restrictions to access the model or implementing  
774       safety filters.
- 775       • Datasets that have been scraped from the Internet could pose safety risks. The authors  
776       should describe how they avoided releasing unsafe images.
- 777       • We recognize that providing effective safeguards is challenging, and many papers do  
778       not require this, but we encourage authors to take this into account and make a best  
779       faith effort.

## 780 12. Licenses for existing assets

781   Question: Are the creators or original owners of assets (e.g., code, data, models), used in  
782   the paper, properly credited and are the license and terms of use explicitly mentioned and  
783   properly respected?

784   Answer: [NA]

785   Justification: The paper does not use existing assets.

786   Guidelines:

- 787       • The answer NA means that the paper does not use existing assets.
- 788       • The authors should cite the original paper that produced the code package or dataset.
- 789       • The authors should state which version of the asset is used and, if possible, include a  
790       URL.
- 791       • The name of the license (e.g., CC-BY 4.0) should be included for each asset.
- 792       • For scraped data from a particular source (e.g., website), the copyright and terms of  
793       service of that source should be provided.
- 794       • If assets are released, the license, copyright information, and terms of use in the  
795       package should be provided. For popular datasets, [paperswithcode.com/datasets](https://paperswithcode.com/datasets)  
796       has curated licenses for some datasets. Their licensing guide can help determine the  
797       license of a dataset.
- 798       • For existing datasets that are re-packaged, both the original license and the license of  
799       the derived asset (if it has changed) should be provided.
- 800       • If this information is not available online, the authors are encouraged to reach out to  
801       the asset's creators.

## 802 13. New assets

803   Question: Are new assets introduced in the paper well documented and is the documentation  
804   provided alongside the assets?

805   Answer: [NA]

806   Justification: The paper does not release new assets.

807   Guidelines:

- 808       • The answer NA means that the paper does not release new assets.
- 809       • Researchers should communicate the details of the dataset/code/model as part of their  
810       submissions via structured templates. This includes details about training, license,  
811       limitations, etc.
- 812       • The paper should discuss whether and how consent was obtained from people whose  
813       asset is used.
- 814       • At submission time, remember to anonymize your assets (if applicable). You can either  
815       create an anonymized URL or include an anonymized zip file.

816 **14. Crowdsourcing and research with human subjects**

817 Question: For crowdsourcing experiments and research with human subjects, does the paper  
818 include the full text of instructions given to participants and screenshots, if applicable, as  
819 well as details about compensation (if any)?

820 Answer: [NA]

821 Justification: The paper does not involve crowdsourcing nor research with human subjects.  
822 Guidelines:

- 823 • The answer NA means that the paper does not involve crowdsourcing nor research with  
824 human subjects.
- 825 • Including this information in the supplemental material is fine, but if the main contribu-  
826 tion of the paper involves human subjects, then as much detail as possible should be  
827 included in the main paper.
- 828 • According to the NeurIPS Code of Ethics, workers involved in data collection, curation,  
829 or other labor should be paid at least the minimum wage in the country of the data  
830 collector.

831 **15. Institutional review board (IRB) approvals or equivalent for research with human**  
832 **subjects**

833 Question: Does the paper describe potential risks incurred by study participants, whether  
834 such risks were disclosed to the subjects, and whether Institutional Review Board (IRB)  
835 approvals (or an equivalent approval/review based on the requirements of your country or  
836 institution) were obtained?

837 Answer: [NA]

838 Justification: The paper does not involve crowdsourcing nor research with human subjects.  
839 Guidelines:

- 840 • The answer NA means that the paper does not involve crowdsourcing nor research with  
841 human subjects.
- 842 • Depending on the country in which research is conducted, IRB approval (or equivalent)  
843 may be required for any human subjects research. If you obtained IRB approval, you  
844 should clearly state this in the paper.
- 845 • We recognize that the procedures for this may vary significantly between institutions  
846 and locations, and we expect authors to adhere to the NeurIPS Code of Ethics and the  
847 guidelines for their institution.
- 848 • For initial submissions, do not include any information that would break anonymity (if  
849 applicable), such as the institution conducting the review.

850 **16. Declaration of LLM usage**

851 Question: Does the paper describe the usage of LLMs if it is an important, original, or  
852 non-standard component of the core methods in this research? Note that if the LLM is used  
853 only for writing, editing, or formatting purposes and does not impact the core methodology,  
854 scientific rigor, or originality of the research, declaration is not required.

855 Answer: [NA]

856 Justification: The core method development in this research does not involve LLMs as any  
857 important, original, or non-standard components.

858 Guidelines:

- 859 • The answer NA means that the core method development in this research does not  
860 involve LLMs as any important, original, or non-standard components.
- 861 • Please refer to our LLM policy (<https://neurips.cc/Conferences/2025/LLM>)  
862 for what should or should not be described.



## 863 Supplementary Material

### 864 A Additional Preliminaries

#### 865 A.1 Probability and Information Theory

866 In this subsection, we present some basic lemmas about probability and information theory.

867 **Lemma A.1** (Poisson Concentration (see e.g. [14])). *Let  $X \sim \text{Poi}(\lambda)$ . Then for any  $x > 0$ ,*

$$\max(\Pr(X \geq \lambda + x), \Pr(X \leq \lambda - x)) < e^{-\frac{x^2}{2(\lambda+x)}}.$$

868 **Claim A.2** (Asymptotically Equivalent Notation of mutual information). *Let  $X$  be an unbiased*  
869 *uniform random bit, and  $M$  be a discrete random variable s.t.  $\Pr[M = a|X = 0] = \Theta(1) \Pr[M =$   
870  $a|X = 1]$ , for all  $a$  within the support of  $M$ , then the mutual information between the two random*  
871 *variables satisfies that  $I(X : M) = O(1) \sum_a \frac{(\Pr[M=a|X=0] - \Pr[M=a|X=1])^2}{\Pr[M=a|X=0] + \Pr[M=a|X=1]}$ .*

872 *Proof.* Denote  $\alpha := \Pr[M = a, X = 1], \beta := \Pr[M = a, X = 0]$  for simplicity. Since  $\Pr[X =$   
873  $1] = \Pr[X = 0] = 1/2 \implies \beta = \Theta(\alpha)$  then  $\frac{(\beta - \alpha)^2}{\beta + \alpha} = \Theta\left(\frac{(\beta - \alpha)^2}{\alpha}\right) = \Theta\left(\frac{(\beta - \alpha)^2}{\beta}\right)$ . By definition,

$$\begin{aligned} I(X : M) &= \sum_a \sum_{i=0,1} \Pr[X = i, M = a] \log \left( \frac{\Pr[X = i, M = a]}{\Pr[X = i] \Pr[M = a]} \right) \\ &= \frac{1}{2} \sum_a \left( \beta \log \left( \frac{2\beta}{\beta + \alpha} \right) + \alpha \log \left( \frac{2\alpha}{\beta + \alpha} \right) \right) \\ &\quad \text{rearranging} \\ &= \Theta(1) \sum_a \left( \beta \log \left( \frac{1}{1 + \frac{\alpha - \beta}{2\beta}} \right) + \alpha \log \left( \frac{1}{1 - \frac{\alpha - \beta}{2\alpha}} \right) \right). \end{aligned}$$

874 Denote  $A := \frac{\alpha - \beta}{2\beta}$  and  $B := \frac{\alpha - \beta}{2\alpha}$ , then by Taylor expansion of  $\log\left(\frac{1}{1+A}\right)$  and  $\log\left(\frac{1}{1-B}\right)$  we have  
875 that

$$\begin{aligned} I(X : M) &= \Theta(1) \sum_a \left( \beta \left( \sum_{n=1}^{\infty} (-1)^n \frac{A^n}{n} \right) + \alpha \left( \sum_{n=1}^{\infty} \frac{B^n}{n} \right) \right) \\ &= \Theta(1) \sum_a \left( \sum_{\substack{n=3 \\ n \text{ odd}}} \frac{1}{n} (\alpha B^n - \beta A^n) + \sum_{\substack{n=2 \\ n \text{ even}}} \frac{1}{n} (\beta A^n + \alpha B^n) \right) \\ &\leq O(1) \sum_a 2 \sum_{n=2} (\alpha B^n + \beta A^n) \leq O(1) \alpha B^2 = \sum_a O\left(\frac{(\beta - \alpha)^2}{\alpha}\right) \end{aligned}$$

876 as desired. □

#### 877 A.2 Random Walks

878 Let RW denote a random walk with transition matrix  $P$  where  $P(x, y)$  denotes the probability of  
879 transitioning to state  $y$  from state  $x$ .  $P^t(x, y)$  hence denotes the probability of landing in a state  $y$   
880 after  $t$  steps if one starts from state  $x$ . We give some elementary properties of random walks important  
881 to our analysis.

882 **Definition A.3.** *A random walk RW is irreducible if for all  $x, y$ , there exists  $t > 0$  such that*  
883  $P^t(x, y) > 0$ .

884 **Definition A.4.** *For a given state  $x$ , let  $\mathcal{T}(x) := \{t > 0 \text{ s.t. } P^t(x, x) > 0\}$ . The period of  $x$  is the*  
885 *greatest common divisor of  $\mathcal{T}(x)$ . A random walk is aperiodic if the period of any of its states is 1.*

886 A random walk that is both irreducible and aperiodic is called ergodic.

887 We say a distribution  $\pi$  over the states of a random walk is stationary if it stays invariant after one  
 888 step of the random walk. A useful fact is that any ergodic random walk has a unique stationary  
 889 distribution.

890 **Fact 2.** *Any irreducible and aperiodic random walk has a unique stationary distribution.*

891 While any irreducible and aperiodic random walk is guaranteed to converge to its stationary distribu-  
 892 tion, we are interested in a quantitative bound on the convergence rate. In what follows, we define the  
 893 concept of the mixing time of a random walk and give the relevant preliminaries (see e.g. [39, 32] for  
 894 a detailed survey).

895 **Definition A.5.** *The mixing time  $\tau(\delta)$  of an ergodic random walk  $\mathbf{RW}$  with stationary distribution  $\pi$   
 896 is defined by*

$$\tau(\delta) = \max_{i \in \Omega} \min \left\{ t \text{ s.t. } (\forall t' \geq t) \sum_{j \in \Omega} |P_{ij}^{t'} - \pi_j| < \delta \right\}.$$

897 We require the following facts regarding mixing time. First, the mixing time of a product random  
 898 walk can be bounded via the mixing times of the individual coordinates (up to polynomial factors in  
 899 the dimension).

900 **Lemma A.6.** *Let  $\mathbf{RW}$  be a random walk over the product space  $\mathcal{X}^n$ , where the  $i$ -th coordinate  
 901 follows an independent random walk  $\mathbf{RW}_i$  over  $\mathcal{X}$ . Assume that  $\mathbf{RW}_i$  has mixing time  $\tau_i(\delta)$ . Then  
 902 the mixing time of  $\mathbf{RW}$  satisfies that  $\tau(\delta) \leq \max_i \tau_i(\delta/n)$ .*

903 *Proof.* Let  $P^{(i)}$  denote the transition matrix for each coordinate  $i$  and  $\pi^{(i)}$  denote the stationary  
 904 distribution. Then,

$$\left\| \prod_{\ell=1}^n P^{(\ell)t} - \prod_{\ell=1}^n \pi^{(\ell)} \right\|_1 \leq \sum_{\ell=1}^n \left\| P^{(\ell)t} - \pi^{(\ell)} \right\|_1.$$

905 This concludes the proof of Lemma A.6. □

906 For any ergodic random walk  $\mathbf{RW}$  with transition matrix  $P$  and stationary distribution  $\pi$ , we let  $\lambda$   
 907 denote the eigenvalues of  $P$ . The following lemma relates the mixing time to the absolute spectral  
 908 gap  $\lambda_*$  of the transition matrix (or alternative the relaxation time of the random walk).

909 **Definition A.7.** *Let  $\mathcal{E}$  be the set of eigenvalues of the transition matrix  $P$ . The absolute spectral gap of  
 910 a Markov chain with transition matrix  $P$  is  $\gamma_* = 1 - \lambda_*$ , where  $\lambda_* = \max |\lambda|$  s.t.  $\lambda \neq 1$  and  $\lambda \in \mathcal{E}$ .*

911 **Definition A.8.** *The relaxation time of a Markov chain is  $t_{\text{rel}} = \frac{1}{\gamma_*}$ .*

912 Another property important to the mixing time of the random walk is the detailed balance criteria. If  
 913 a random walk satisfies this criteria, then we say it is reversible.

914 **Definition A.9** (Detailed Balance Criteria). *A random walk is reversible if and only if for all states  
 915  $x, y$ ,  $\pi(x)P(x, y) = \pi(y)P(y, x)$ .*

916 We are now ready to state the mixing time of a Markov chain in terms of its relaxation time (or the  
 917 inverse of the absolute spectral gap).

918 **Theorem A.10** (Theorem 12.5 of [39]). *For an ergodic and reversible Markov chain, its mixing time  
 919 satisfies that*

$$\tau(\delta) \geq (t_{\text{rel}} - 1) \log(1/2\delta).$$

## 920 B Replicable Independence Testing Algorithm

921 In this section, we provide omitted proofs and analysis for our replicable independence tester, and  
 922 then conclude the proof of Theorem 1.6.

923 We begin with a useful property of the flattening procedure (see Definition 2.1) — it ensures that  
 924 there will be no “heavy” bins after the operation with high probability .

**Lemma B.1.** Let  $S$  be a set of samples over  $[n]$  with  $|S| = \text{poly}(n)$ , and  $S^f = \text{Flatten}(S; \alpha)$ . Denote by  $T^f$  the sample count vector of the flattened samples. For any constant  $C$ , it holds that  $T_i^f \leq O(\alpha^{-1} \log n)$  for all  $i \in \text{supp}(S^f)$  with probability at least  $1 - n^{-C}$ , where the randomness is over the internal randomness of  $\text{Flatten}(\cdot)$ .

*Proof.* After sorting the samples in  $S$ , we note that the position of the first flattening sample follows exactly a geometric distribution with mean  $1/\alpha$ . Denote by  $Y$  its position. We have that  $\Pr[Y \geq t] = (1 - \alpha)^{t-1} = \exp((t-1) \log(1 - \alpha)) \leq \exp(-\alpha(t-1))$ . In particular, this implies that  $\Pr[Y \geq a\alpha^{-1} \log(n)] \leq n^{-a}$  for any number  $a > 0$ . This shows that with probability at least  $n^{-a}$  it holds that the number of samples falling in the first bin is at most  $a\alpha^{-1} \log(1/n)$ . If we choose  $a$  to be a sufficiently large constant, we then have that  $Y \leq O(\alpha^{-1} \log(n))$  with probability at least  $1 - 1/\text{poly}(n)$ . Since  $Y$  is also the number of samples within the first sub-bin, Lemma B.1 then follows applying this argument to all subsequent samples and the union bound.  $\square$

Recall that a key technical step is to bound the variance of the averaged independence statistic  $Z_a(S_p, S_q)$  by the expected value of the non-singleton sample count  $N_a(S_p, S_q)$ .

*Proof of Lemma 2.9.* We will bound the variance of  $Z_a(S_p, S_q)$  by the expected sum over samples of the squared difference in the final test statistic by removing each sample.

In particular, suppose that  $S_p, S_q$  contains the samples  $\{P_\ell\}_{\ell=1}^k$ . For convenience, we denote by  $S_{p,-\ell}, S_{q,-\ell}$  the corresponding set after removing the sample  $P_\ell$ .<sup>4</sup> We then have the following inequality that bounds from above the variance.

$$\text{Var}[Z_a(S_p, S_q)] \leq O(1) \mathbb{E} \left[ \sum_{\ell=1}^k (Z_a(S_{p,-\ell}, S_{q,-\ell}) - Z_a(S_p, S_q))^2 \right], \quad (3)$$

where the randomness is over the samples. Fix some sample sets  $S_p, S_q$ . Consider the random variables  $Z = \text{INDEPENDENCESTATS}(S_p, S_q)$  and  $Z_{-\ell} = \text{INDEPENDENCESTATS}(S_{p,-\ell}, S_{q,-\ell})$ . We claim that it suffices for us to show that

$$\sum_{\ell=1}^k (\mathbb{E}[Z] - \mathbb{E}[Z_{-\ell}])^2 \leq O(\log^2(n_1 n_2)) N_a(S_p, S_q), \quad (4)$$

where the expectation is over the internal randomness of  $\text{INDEPENDENCESTATS}$ . After that, taking expectation over the randomness of the samples on both sides of Equation (4) and combining it with Equation (3) then concludes the proof.

It then remains for us to show Equation (4). Recall that the tester first partitions the samples into flattening samples and testing samples randomly. We denote by  $S_p^f, S_q^f$  the flattened testing samples constructed in Line 3 from the original sample set  $S_p, S_q$ , and  $S_{p,-\ell}^f, S_{q,-\ell}^f$  the ones constructed from the leave-one-out sample sets  $S_{p,-\ell}, S_{q,-\ell}$ .

Denote by  $F_\ell^x, F_\ell^y \in \{0, 1\}$  the indicator variables of whether  $P_\ell$  is selected for row or column flattening purpose respectively (see Definition 2.2) while constructing  $S_p^f, S_q^f$ . We then break into cases based on the values of  $F_\ell^x, F_\ell^y$ .

In the first case, we have that  $F_\ell^x = F_\ell^y = 0$ . This suggests that the  $\ell$ -th sample is not selected as a flattening sample. Hence, there exists a flattened version of  $P_\ell$ , which we denote by  $P_\ell^f$ , within  $S_p^f \cup S_q^f$ . In this case,  $S_{p,-\ell}^f, S_{q,-\ell}^f$  are obtained by deleting exactly  $P_\ell^f$  from  $S_p^f, S_q^f$ . There are then again two sub-cases. Either  $P_\ell^f$  is a singleton sample among  $S_{p,-\ell}^f \cup S_{q,-\ell}^f$ . In that case, we must have  $Z_C(S_p^f, S_q^f) = Z_C(\bar{S}_{p,-\ell}^f, \bar{S}_{q,-\ell}^f)$  by Fact 1. Otherwise, we have  $|Z(S_p^f, S_q^f) - Z(\bar{S}_{p,k}^f, \bar{S}_{q,k}^f)| \leq O(1)$  as the closeness test statistic is Lipschitz in its inputs. As a result, it follows that

$$\sum_{\ell=1}^k (\mathbb{E}[Z \mathbb{1}\{F_\ell^x = F_\ell^y = 0\}] - \mathbb{E}[Z_{-\ell}])^2 \leq \mathbb{E}[N(S_p^f \cup S_q^f)]. \quad (5)$$

<sup>4</sup>If  $P_\ell \notin S_p$ , then  $S_{p,-\ell} = S_p$ , and the same for  $S_{q,-\ell}$ .

Next, consider the case that  $F_\ell^x = 1$  and  $F_\ell^y = 0$ , which happens with probability at most  $p_x := \min(n_1/(100m), 1/100)$ . This suggests that the  $P_\ell$  is selected as a row flattening sample. Denote by  $K_\ell$  the number of samples lying in the same row as  $P_\ell$ . Consider the following coupling between  $(S_p^f, S_q^f)$  (conditioned on  $F_\ell^x = 1$  and  $F_\ell^y = 0$ ) and  $(S_{p,-\ell}^f, S_{q,-\ell}^f)$ : (1) Pick a random sub-row  $a$  (in the flattened domain) weighted by the total sample count of sub-row  $a$  within  $S_{p,-\ell}^f \cup S_{q,-\ell}^f$  divided by  $K_\ell$ , (2) subdivide the sub-row into two sub-rows  $a_1, a_2$ , and (3) randomly assign the samples from  $a$  to  $a_1, a_2$ . Denote by  $T_i$  the total number of samples among  $S_{p,-\ell}^f \cup S_{q,-\ell}^f$  within the sub-row  $i$ , and  $N_i$  the corresponding non-singleton sample count. Note that if a flattened sample is a singleton sample among  $S_{p,-\ell}^f \cup S_{q,-\ell}^f$ , then it remains a singleton sample after the subdivision, and hence has no impact on the final closeness statistic. Therefore, such subdivision can change the final closeness statistic by at most  $N_i$ . On the other hand, the probability of the sub-row  $i$  being selected and the sample  $\ell$  being selected for flattening purpose is at most  $p_x T_i/K_\ell$ . Hence, the averaged statistic changes by at most

$$(\mathbb{E}[Z \mathbb{1}\{F_\ell^x = 1, F_\ell^y = 0\}] - \mathbb{E}[Z_{-\ell}])^2 \leq O(1) \left( \sum_{i: \text{sub-rows of the row of } P_\ell} \mathbb{E} \left[ \frac{N_i p_x T_i}{K_\ell} \right] \right)^2.$$

Summing over all  $\ell'$  such that  $P_\ell$  and  $P_{\ell'}$  lie in the same row then gives that

$$\sum_{\ell': P_\ell \text{ lies in the same row as } P_{\ell'}} (\mathbb{E}[Z \mathbb{1}\{F_\ell^x = 1, F_\ell^y = 0\}] - \mathbb{E}[Z_{-\ell}])^2 \leq O(1) \mathbb{E}^2 \left[ \sum_{i: \text{sub-rows of the row of } P_\ell} N_i p_x T_i \right] / K_\ell.$$

963 By Lemma B.1, we have that  $T_i$  is at most  $\log(n_1)p_x^{-1}$  with probability at least  $1 - 1/\text{poly}(n_1)$ .  
 964 Besides,  $\sum_{i: \text{sub-rows of the row of } P_\ell} N_i$  is always at most  $K_\ell$ . It then follows that

$$\begin{aligned} & \sum_{\ell': P_\ell \text{ lies in the same row as } P_{\ell'}} (\mathbb{E}[Z \mathbb{1}\{F_\ell^x = 1, F_\ell^y = 0\}] - \mathbb{E}[Z_{-\ell}])^2 \\ & \leq O(\log^2 n) \mathbb{E}^2 \left[ \sum_{i: \text{sub-rows of the row of } P_\ell} N_i \right] / K_\ell \\ & \leq O(\log^2 n) \mathbb{E} \left[ \sum_{i: \text{sub-rows of the row of } P_\ell} N_i \right]. \end{aligned}$$

965 Note that the non-single sample count can only increase conditioned on that  $P_\ell$  is not selected for  
 966 flattening, which happens with at least constant probability. As a result, the expected number of  
 967 non-singleton samples among  $S_{p,-\ell}^f \cup S_{q,-\ell}^f$  is always at most a constant factor of the expected  
 968 number of non-singleton samples among  $S_p^f \cup S_q^f$ . Summing over all  $\ell$  then gives that

$$\sum_{\ell=1}^k (\mathbb{E}[Z \mathbb{1}\{F_\ell^x = 1, F_\ell^y = 0\}] - \mathbb{E}[Z_{-\ell}])^2 \leq O(\log^2 n_1) \mathbb{E} [N(S_p^f, S_q^f)]. \quad (6)$$

969 This then concludes the analysis of the second case.

970 In the third case, we assume that  $F_\ell^x = 0, F_\ell^y = 1$ . Using an argument that is almost identical to the  
 971 second case, one can show that

$$\sum_{\ell=1}^k (\mathbb{E}[Z \mathbb{1}\{F_\ell^x = 0, F_\ell^y = 1\}] - \mathbb{E}[Z_{-\ell}])^2 \leq O(\log^2 n_2) \mathbb{E} [N(S_p^f, S_q^f)]. \quad (7)$$

972 as this corresponds to the case when the  $k$ -th sample is chosen for column flattening.

973 Finally, for  $F_k^x = F_k^y = 1$ , we can use an argument that is almost identical to the second case to show  
 974 that

$$\sum_{\ell=1}^k (\mathbb{E}[Z \mathbb{1}\{F_\ell^x = 1, F_\ell^y = 1\}] - \mathbb{E}[Z \mathbb{1}\{F_\ell^x = 0, F_\ell^y = 1\}])^2 \leq O(\log^2 n_1) \mathbb{E} [N(S_p^f, S_q^f)].$$

975 It then follows from the triangle inequality that

$$\begin{aligned}
& \sum_{\ell=1}^k (\mathbb{E}[Z \mathbb{1}\{F_\ell^x = 0, F_\ell^y = 1\}] - \mathbb{E}[Z_{-\ell}])^2 \\
& \leq O(1) \left( \sum_{\ell=1}^k (\mathbb{E}[Z \mathbb{1}\{F_\ell^x = 1, F_\ell^y = 1\}] - \mathbb{E}[Z \mathbb{1}\{F_\ell^x = 0, F_\ell^y = 1\}])^2 \right. \\
& \quad \left. + \sum_{\ell=1}^k (\mathbb{E}[Z \mathbb{1}\{F_\ell^x = 0, F_\ell^y = 1\}] - \mathbb{E}[Z_{-\ell}])^2 \right) \leq O(\log^2 n_1) \mathbb{E}[N(S_p^f, S_q^f)]. \quad (8)
\end{aligned}$$

Combining the case analysis (Equations (5) to (8)) then yields that

$$\sum_{\ell=1}^k (\mathbb{E}[Z] - \mathbb{E}[Z_{-\ell}])^2 \leq O(\log^2 n_1) \mathbb{E}[N(S_p^f \cup S_q^f)] = O(\log^2 n_1) N_a(S_p, S_q).$$

976 This concludes the proof of Equation (4) as well as Lemma 2.9.  $\square$

977 Recall that we adhere to a two-stage testing strategy, where we first test the size of the expected  
 978 non-singleton sample count before computing the averaged independence statistics. In what follows,  
 979 we provide the proof which bounds the variance of the averaged non-singleton sample count by its  
 980 expected value.

981 *Proof of Lemma 2.11.* Denote by  $N(S_p^f, S_q^f)$  the number of non-singleton samples among  $S_p^f \cup S_q^f$ .  
 982 Recall that the averaged non-singleton sample count  $N_a(S_p, S_q)$  is simply  $\mathbb{E}[N(S_p^f, S_q^f)]$ , where  
 983 the randomness is over the flattened sample set  $S_p^f, S_q^f$ . Similar to the closeness statistic  $Z_C(S_p^f, S_q^f)$ ,  
 984  $N(S_p^f, S_q^f)$  has the two following properties: (1)  $N(S_p^f, S_q^f)$  is invariant if one removes any singleton  
 985 sample from  $S_p^f$  or  $S_q^f$  and changes by 1 if one removes a non-singleton sample. We note that these  
 986 are the only two properties used in Lemma 2.9 to show that the variance of the averaged statistic  
 987  $Z_a(S_p, S_q)$  can be bounded from above by  $O(\log^2(n_1 n_2)) \mathbb{E}[N_a(S_p, S_q)]$ . Hence, we can use the  
 988 same argument to show that  $\text{Var}[N_a(S_p, S_q)] \leq O(\log^2(n_1 n_2)) \mathbb{E}[N_a(S_p, S_q)]$ , and this concludes  
 989 the proof of Lemma 2.11.  $\square$

990 We are now ready to show the full analysis of our replicable independence tester, and the proof of  
 991 Theorem 1.6.

992 *Proof of Theorem 1.6.* Recall that the algorithm has two steps. In the first step, it verifies that the size  
 993 of the expected value of the non-singleton sample count is not large by comparing  $N_a(S_p, S_q)$  with a  
 994 random threshold. In the second step, it computes the averaged independence statistics  $Z_a(S_p, S_q)$   
 995 with fresh samples, and compare it with another appropriately chosen random threshold.

996 We first analyze the correctness and replicability of the first step. Let  $m$  be defined as in Line 1 of  
 997 INDEPENDENCESTATS, and  $S_p, S_q$  be sample sets with size  $100m$ . By Lemma 2.10, the expected  
 998 number of non-singleton sample count  $\mathbb{E}[N_a(S_p, S_q)]$  is at most  $C_N \max(m^2/(n_1 n_2), m/n_2)$  for  
 999 some constant  $C_N$  if the underlying distribution  $\mathbf{p}$  is indeed a product distribution. By Lemma 2.11,  
 1000 we have that  $\text{Var}[N_a(S_p, S_q)] \leq \mathbb{E}[N_a(S_p, S_q)]$ . We first show the validity of the following bound:

$$\log^2(n_1) \max(m^2/(n_1 n_2), m/n_2) \ll \rho^2 (\max(m^2/(n_1 n_2), m/n_2))^2. \quad (9)$$

In particular, we will see that for this step, it is sufficient if  $m \gg n_1^{2/3} n_2^{1/3} \rho^{-2/3} + \sqrt{n_1 n_2} \rho^{-1}$ . We  
 begin with a case analysis. In the first case, we have that  $m^2/(n_1 n_2)$  is the dominating term in  
 Equation (9). It is not hard to verify that

$$m^2/(n_1 n_2) \leq \rho^2 m^4/(n_1 n_2)^2$$

1001 as long as  $m \gg \sqrt{n_1 n_2} \rho^{-1}$ . So Equation (9) easily holds in this case. In the second case, we  
 1002 have that  $m^2/(n_1 n_2) \leq m/n_2$  and so  $m/n_2$  is the dominating term. In this case, we need to show  
 1003 that  $m/n_2 \leq \rho^2 (m/n_2)^2$ , which is true as long as  $m \geq n_2 \rho^{-2}$ . In particular, the case assumption



1004 indicates that  $n_1^{2/3} n_2^{1/3} \rho^{-2/3} \ll m < n_1$ . This implies that  $n_1 \gg n_2 \rho^{-2}$ , which further implies that  
 1005  $m \gg \sqrt{n_1 n_2} \rho^{-1} > n_2 \rho^{-2}$ . This hence concludes the proof of Equation (9).

1006 To argue the correctness of the tester, we analyze the completeness and the soundness cases separately.  
 1007 Denote by  $G := C_N \max(m^2/(n_1 n_2), m/n_2)$ . In the completeness case, the expectation is at most  
 1008  $G$ , and the variance is at most  $O(1) \log^2(n_1) G$ . By Chebyshev's inequality and Equation (9), the  
 1009 statistic  $N_a(S_p, S_q)$  will be at most  $2G$  with high constant probability. In the soundness case, suppose  
 1010  $\mathbb{E}[N_a(S_p, S_q)] \geq 101G$ . It is not hard to verify that  $G \gg \log^2(n_1)$  as our choice of  $m$  ensures that  
 1011  $m \gg \log^2(n_1) \sqrt{n_1 n_2} \geq \log^2(n_1) n_2$ . In particular, this implies that  $\sqrt{\log(n_1) G} \ll G$ . In this case,  
 1012 by Chebyshev's inequality,  $N_a(S_p, S_q)$  is at least  $101G - \sqrt{\log^2(n_1) G} \geq 100G$ . The above ensures  
 1013 that the tester will be correct with high constant probability. Combining this with the standard median  
 1014 trick then ensures correctness with probability at least  $1 - \rho$  at the cost of increasing the sample  
 1015 complexity by an extra  $\log(1/\rho)$  factor.

1016 To argue the replicability of the tester when we are in neither the completeness nor the soundness  
 1017 case, we note that the variance is at most  $\log(n_1) G$ . By Chebyshev's inequality and Equation (9),  
 1018 we have that the test statistic will concentration around an interval of size  $\sqrt{\log(n_1) G} \ll \rho G$  with  
 1019 high constant probability. Again, combining this with the median trick ensures that  $N_a(S_p, S_q)$  will  
 1020 lie in an interval (around its expected value) of size  $\rho G$  with probability at least  $1 - \rho$  (at the cost  
 1021 of increasing the sample complexity by an extra factor of  $\log(1/\rho)$ ). Conditioned on that, we have  
 1022 that the tester will be replicable as long as the random threshold lies outside this interval of size  $\rho G$ ,  
 1023 which happens with probability at least  $1 - \rho$ . We can therefore conclude that the tester is replicable  
 1024 with probability at least  $1 - 2\rho$  by the union bound.

Conditioned on that the first-stage testing passes, we hence must have that

$$\text{Var}[Z_a(S_p, S_q)] \leq \log^2(n_1) \mathbb{E}[N_a(S_p, S_q)] \leq O(\log^2(n_1)) (m^2/(n_1 n_2) + m/n_2).$$

1025 Besides, since  $Z_a(S_p, S_q)$  is the average over some statistic that is Lipchitz in the input samples, we  
 1026 also have the trivial variance bound  $\text{Var}[Z_a(S_p, S_q)] \leq O(m)$ . Again, we begin with a quantitative  
 1027 bound that will be useful for both the replicability and correctness analysis:

$$\sqrt{\log^2(n_1) \min(m, m^2/(n_1 n_2) + m/n_2)} \ll \rho \min(\varepsilon m, m^2 \varepsilon^2/(n_1 n_2), m^{3/2} \varepsilon^2/\sqrt{n_1 n_2}). \quad (10)$$

1028 Again, we proceed by a case analysis. Suppose the right hand side evaluates to  $\varepsilon m$ . We note that  
 1029  $\log(n_1) \sqrt{m} \ll \rho \varepsilon m$  as long as  $m \gg \log^2(n_1) \rho^{-2} \varepsilon^{-2}$ . So Equation (10) clearly holds in this  
 1030 case. Suppose that the right hand side evaluates to  $m^2 \varepsilon^2/(n_1 n_2)$ . The case assumption implies  
 1031 that  $m^{1/2} \leq \sqrt{n_1 n_2}$ , which further implies that  $m \leq n_1 n_2$ . Since we always have  $m \gg n_2$ , this  
 1032 suggests that  $m/n_2$  will be the dominating term on the left hand side. However, we always have  
 1033  $\log(n_1) \sqrt{m/n_2} \ll \rho m^2 \varepsilon^2/(n_1 n_2)$  as long as  $m \gg \log^{2/3}(n_1) n_1^{2/3} n_2^{1/3} \rho^{-2/3} \varepsilon^{-4/3}$ . This verifies  
 1034 the validity of Equation (10) in this case. The last case is when the right hand side evaluates to  
 1035  $m^{3/2} \varepsilon^2/\sqrt{n_1 n_2}$ . In this case, it suffices to show that  $\log(n_1) \sqrt{m} \ll \rho m^{3/2} \varepsilon^2/\sqrt{n_1 n_2}$ , which is true  
 1036 as long as  $m \gg \log(n_1) \sqrt{n_1 n_2} \varepsilon^{-2} \rho^{-1}$ . This concludes the proof of Equation (10).

1037 To argue the correctness of the second stage, we again break into the completeness and the soundness  
 1038 cases. For convenience, denote by  $H_E := \min(\varepsilon m, m^2 \varepsilon^2/(n_1 n_2), m^{3/2} \varepsilon^2/\sqrt{n_1 n_2})$  and  $H_V :=$   
 1039  $\log^2(n_1) \min(m, m^2/(n_1 n_2) + m/n_2)$ . In the completeness case, by Lemma 2.5, we have that  
 1040  $\mathbb{E}[Z_a(S_p, S_q)] \leq C_{I_1} H_E$ . By Equation (10) and Chebyshev's inequality, we have that  $Z_a(S_p, S_q) \leq$   
 1041  $C_{I_1} H_E + O(\sqrt{H_V}) \leq (C_{I_1} + o(1)) H_E$  with high constant probability. In the soundness case, by  
 1042 Lemma 2.5, we have that  $\mathbb{E}[Z_a(S_p, S_q)] \geq C_{I_2} H_E$ . By Equation (10) and Chebyshev's inequality,  
 1043 we have that  $Z_a(S_p, S_q) \geq C_{I_2} H_E - O(\sqrt{H_V}) \leq (C_{I_2} - o(1)) H_E$  with high constant probability.  
 1044 This shows that the test on  $Z_a(S_p, S_q)$  is correct with high constant probability. Combining this  
 1045 with the median trick ensures correctness with probability at least  $1 - \rho$  at the cost of increasing the  
 1046 sample complexity by an extra factor of  $\log(1/\rho)$ .

1047 To argue the replicability of the second stage, we note that  $Z_a(S_p, S_q)$  must lie in an interval around  
 1048 its expected value with size at most  $\sqrt{H_V} \ll \rho H_E$  with high constant probability. Again, combining  
 1049 this with the median trick ensures that  $Z_a(S_p, S_q)$  must lie in an interval  $L$  of size  $\rho H_E$  with  
 1050 probability at least  $1 - \rho$  (at the cost of increasing the sample complexity by an extra factor of

1051  $\log(1/\rho)$ ). Thus, the tester will be replicable as long as the random threshold chosen uniformly  
 1052 random from  $[C_{I_1} H_E, C_{I_2} H_E]$  falls outside of this interval  $L$ . This happens with probability at least  
 1053  $1 - \frac{\rho H_E}{(C_{I_2} - C_{I_1}) H_E} \geq 1 - O(\rho)$ . We can then conclude that the tester is replicable with probability at  
 1054 least  $1 - O(\rho)$  by the union bound.

1055 Lastly, it is clear from the description of `REPINDEPENDENCESTATS` that the tester draws  $\Theta(m)$   
 1056 many samples, and  $m$  (Line 1 of `INDEPENDENCESTATS`) is within the sample budget of Theorem 1.6.  
 1057 This concludes the proof of Theorem 1.6.  $\square$

## 1058 C Replicable Closeness Testing Algorithm

1059 In this section, we present a replicable closeness tester with optimal sample complexity.

---

### Algorithm 3 `REPCLOSENESSTESTER`(( $\mathbf{p}, \mathbf{q}$ ), $\epsilon, \rho, n$ )

---

**Input:** sample access to distribution  $\mathbf{p}$  and  $\mathbf{q}$  supported on  $[n]$ .  
**Parameter:**  $\epsilon \in (0, 1/4)$  tolerance,  $\rho \in (0, 1/4)$  replicability,  $n$  support size.  
**Output:** ACCEPT if  $\mathbf{p} = \mathbf{q}$ , REJECT if  $d_{TV}(\mathbf{p}, \mathbf{q}) \geq \epsilon$ .

- 1:  $m \leftarrow \tilde{\Theta}\left(\frac{n^{2/3}}{\rho^{2/3}\epsilon^{4/3}} + \frac{\sqrt{n}}{\epsilon^2\rho} + \frac{1}{\rho^2\epsilon^2}\right)$ ,  
 $(m_{\mathbf{p}}, m'_{\mathbf{p}}, m_{\mathbf{q}}, m'_{\mathbf{q}}) \leftarrow \text{Multinom}(4m, (1/4, 1/4, 1/4, 1/4))$ .
- 2: Draw two multisets  $D_1, D_2$  of iid samples from  $p$  of sizes  $m_p, m'_p$  respectively; and two multisets  $D_3, D_4$  of iid samples from  $p$  of sizes  $m_q, m'_q$  respectively.  $\forall i \in [n]$  let  $X_i, X'_i, Y_i, Y'_i$  be the occurrence of  $i$  in  $D_1, D_2, D_3, D_4$ , respectively.
- 3: Compute the statistic  $\forall i \in [n], Z_i \leftarrow |X_i - Y_i| + |X'_i - Y'_i| - |X_i - X'_i| - |Y_i - Y'_i|$  and  $Z \leftarrow \sum_{i=1}^n Z_i$ .
- 4: Set threshold  $r \leftarrow C_1\sqrt{m} + r_0(R - C_1\sqrt{m})$  where  $r_0 \leftarrow \text{Unif}(\frac{1}{4}, \frac{3}{4})$  and  $R, C_1$  are given in Lemma C.2.
- 5: **return** ACCEPT if  $Z \leq r$ . REJECT otherwise.

---

1060 **Theorem C.1.** For  $n \in \mathbb{Z}_+$ ,  $\epsilon, \rho \in (0, 1/4)$ , Algorithm 3 solves  $(n, \epsilon, \rho)$ -replicable closeness testing  
 1061 with sample complexity  $m = \tilde{O}\left(\frac{n^{2/3}}{\epsilon^{4/3}\rho^{2/3}} + \frac{\sqrt{n}}{\epsilon^2\rho} + \frac{1}{\rho^2\epsilon^2}\right)$ .

1062 To show Theorem C.1, the key idea is that firstly, to guarantee correctness the threshold we randomly  
 1063 picked needs to fall between an upper bound on the test statistic of the completeness case and a lower  
 1064 bound on the test statistic of the soundness case whp and the proof follows from [27]; secondly, to  
 1065 guarantee replicability we need to further make sure that the randomly picked threshold falls in the  
 1066 high confidence interval of the statistic with probability  $< \rho$ , so that upon multiple runs, the algorithm  
 1067 gives same answers whp. Remark that the main difference between replicable closeness tester and  
 1068 high confidence closeness tester is that the former needs to whp output the same result upon receiving  
 1069 different sample set even in the case when  $0 < d_{TV}(\mathbf{p}, \mathbf{q}) < \epsilon$ , yet there's no requirement on the  
 1070 behavior of the latter in such case.

1071 The main ingredients are the two following facts: a concentration bound on statistic  $Z$  and the  
 1072 expectation gap between the case when  $\mathbf{p} = \mathbf{q}$  and the case when  $d_{TV}(\mathbf{p}, \mathbf{q}) \geq \epsilon$ . Luckily, both facts  
 1073 were shown in [27].

1074 **Lemma C.2.** (Expectation Gap, Lemma 3.3 in [27]) Given  $m, \epsilon, \rho, n, Z$  as specified in Algorithm 3,  
 1075 there exists universal constants  $C_1, C_2 > 0$  s.t.

- 1076 1. If  $\mathbf{p} = \mathbf{q}$ ,  $\mathbb{E}[Z] \leq C_1\sqrt{m}$ ;
- 1077 2. If  $d_{TV}(\mathbf{p}, \mathbf{q}) \geq \epsilon$ ,  $\mathbb{E}[Z] \geq R := C_2 \min\left(\epsilon m, \frac{m^2\epsilon^2}{n}, \frac{m^{3/2}\epsilon^2}{n^{1/2}}\right)$ . In particular,  $R \geq$   
 1078  $C_2\sqrt{m \log(1/\rho)}$ .

1079 **Lemma C.3.** (Concentration bound on  $Z$ , Section 3.2 in [27]) Given  $m, \rho, Z$  as specified in Algo-  
 1080 rithm 3, there exists a universal constant  $C > 0$  such that  $\Pr\left[|Z - \mathbb{E}[Z]| \geq C\sqrt{m \log(1/\rho)}\right] < \frac{\rho}{2}$   
 1081 where  $C\sqrt{m \log(1/\rho)} < \frac{1}{4}\left(C_2\sqrt{m \log(1/\rho)} - C_1\sqrt{m}\right)$ .

1082 *Proof of Theorem C.1.* We first argue the correctness. From Lemma C.2 and Lemma C.3, with  
 1083 probability  $\geq 1 - \rho/2$  threshold  $r$  falls between the value of  $Z$  for the completeness case and the  
 1084 soundness case, whence successfully separates two cases,

1085 We next show replicability. We break into 3 cases based on the value of  $R$ . Essentially we need to  
 1086 show that for each case the ratio  $\frac{\text{concentration bound}}{\text{expectation gap}} \leq \frac{\rho}{6}$ .

- 1087 • When  $R = C_2 \epsilon m$ , since  $m \geq \frac{36(2C+C_1/6)^2}{C_2^2} \cdot \frac{\log(1/\rho)}{\epsilon^2 \rho^2}$ , we have that  $\frac{2C\sqrt{m \log(1/\rho)}}{C_2 \epsilon m - C_1 \sqrt{m}} \leq \frac{\rho}{6}$ .
- 1088 • When  $R = C_2 \frac{m^2 \epsilon^2}{n}$ , since  $m \geq \frac{4(2C+C_1/6)^{2/3}}{C_2^{2/3}} \cdot \frac{\log^{1/3}(1/\rho) n^{2/3}}{\epsilon^{4/3} \rho^{2/3}}$ , we have that  $\frac{2C\sqrt{m \log(1/\rho)}}{C_2 \frac{m^2 \epsilon^2}{n} - C_1 \sqrt{m}} \leq \frac{\rho}{6}$ .
- 1089 • When  $R = C_2 \frac{m^{3/2} \epsilon^2}{n^{1/2}}$ , since  $m \geq \frac{6(2C+C_1/6)}{C_2} \cdot \frac{\log^{1/2}(1/\rho) \sqrt{n}}{\rho \epsilon^2}$ , we have that  $\frac{2C\sqrt{m \log(1/\rho)}}{C_2 \frac{m^{3/2} \epsilon^2}{n^{1/2}} - C_1 \sqrt{m}} \leq \frac{\rho}{6}$ .

1090 By a union bound, Algorithm 3 is  $\rho$ -replicable.  $\square$

## 1091 D Poissonization and Internal Randomness Elimination

1092 Let  $\mathcal{A}$  be a replicable tester that satisfies the correctness requirement of the corresponding testing  
 1093 problem. To show a sample complexity lower bound against  $\mathcal{A}$ , we often construct a meta-distribution  
 1094  $\mathcal{M}_\xi$  parametrized by a positive number  $\xi \in [0, \epsilon]$  over potential testing instances. In particular,  $\mathcal{M}_\xi$   
 1095 will be constructed such that  $\mathcal{M}_0$  represents a collection of instances satisfying the property to be  
 1096 tested while  $\mathcal{M}_\epsilon$  represents ones that are “far” from satisfying the property.

1097 Our end goal is to show that  $\mathcal{A}$  cannot be  $\rho$ -replicable under a random choice of  $\mathbf{p} \sim \mathcal{M}_\xi$ , where  
 1098  $\xi \sim \mathcal{U}([0, \epsilon])$ , with non-trivial probability.

1099 There are two common techniques towards the goal. Firstly, the tester is usually assumed to take  
 1100 a fixed number of samples from a probability distribution. Nonetheless, a common practice in  
 1101 distribution testing is to first show lower bounds in the so-called Poisson sampling model, which  
 1102 allows for the more general sampling process for pseudo-distributions, i.e., non-negative measures  
 1103 over the discrete domain, and is often more amenable to analyze. After that, one can use a reduction-  
 1104 based argument to translate the lower bound back to the standard sampling model. We restate the  
 1105 sampling model below for convenience.

1106 **Definition D.1** (Poisson Sampling). *Given a non-negative measure  $\mathbf{p}$  over  $[n]$  and an integer  $m$ , the*  
 1107 *Poisson sampling model samples a number  $m' \sim \text{Poi}(m \|\mathbf{p}\|_1)$ , and draws  $m'$  samples from  $\mathbf{p}/\|\mathbf{p}\|_1$ .*  
 1108 *Define  $T \in \mathbb{R}^n$  to be the random vector where  $T_i$  counts the number of element  $i$  seen. We write*  
 1109  *$\text{PoiS}(m, \mathbf{p})$  to denote the distribution of the random vector  $T$ . We say  $\mathcal{A}$  is a Poissonized tester with*  
 1110 *sample complexity  $m$  if it takes as input a sample count vector  $T \sim \text{PoiS}(m, \mathbf{p})$ .*

1111 Secondly, the tester  $\mathcal{A}$  is in general allowed to use internal randomness. Yet, since we have already  
 1112 fixed the hard instance meta-distribution over the testing instances, a common approach in showing  
 1113 replicability lower bounds is to use a minimax style argument that allows us to fix a “good” random  
 1114 string  $r$  such that the induced deterministic algorithm  $\mathcal{A}(\cdot; r)$  enjoys about the same correctness and  
 1115 replicability guarantees under the meta-distribution as the original randomized algorithm. This then  
 1116 allows us to focus on analyzing the replicability of deterministic algorithms under  $\mathbf{p} \sim \mathcal{M}_\xi$ . To  
 1117 facilitate the discussion of the minimax argument, we recall the notion of distributional correctness  
 1118 and replicability.

1119 **Definition D.2** (Distributional Correctness/Replicability). *Let  $\mathcal{M}_\xi$  be a meta-distribution*  
 1120 *parametrized by a number  $\xi \in [0, \epsilon]$  over non-negative measures  $\mathbf{p}$ , and  $\mathcal{A}$  be a Poissonized*  
 1121 *tester with sample complexity  $m$ .*

- 1122 • We say  $\mathcal{A}$  is  $\delta$ -correct with respect to  $\mathcal{M}_\xi$  if  $\Pr_{r, \mathbf{p} \sim \mathcal{M}_0, T \sim \text{PoiS}(m, \mathbf{p})} [\mathcal{A}(T) = \text{Accept}] \geq 1 - \delta$  and
- 1123  $\Pr_{r, \mathbf{p} \sim \mathcal{M}_\epsilon, T \sim \text{PoiS}(m, \mathbf{p})} [\mathcal{A}(T) = \text{Accept}] \leq \delta$ .
- 1124 • We say  $\mathcal{A}$  is  $\rho$ -replicable with respect to  $\mathcal{M}_\xi$  if it holds that
- 1125  $\Pr_{r, \xi \sim \mathcal{U}([0, \epsilon]), \mathbf{p} \sim \mathcal{M}_\xi, T, T' \sim \text{PoiS}(m, \mathbf{p})} [\mathcal{A}(T) \neq \mathcal{A}(T')] \leq \rho$ .

1126 The notions of distributional correctness/replicability for a non-Poissonized tester taking  $m$  samples  
 1127 are defined similarly with the sampling process  $S \sim (\mathbf{p}/\|\mathbf{p}\|_1)^{\otimes m}$  instead of  $T \sim \text{PoiS}(m, \mathbf{p})$ .

1128 To make our lower bound arguments more modular, we show the following meta-lemma that allows  
1129 us to focus on lower bounds against deterministic algorithm within the Poisson sampling model.

1130 **Lemma D.3.** *Let  $\mathcal{M}_\xi$  be a distribution parametrized by a number  $\xi \in (0, \varepsilon)$  over non-negative  
1131 measures  $\mathbf{p}$  over a finite universe  $\mathcal{X}$  satisfying  $\|\mathbf{p}\|_1 \in (0.5, 2)$ . Let  $\delta, \rho \in (0, 1/3)$ , and  $m$  be a  
1132 positive integer satisfying  $m \geq \log(10/\delta) + \log(10/\rho)$ . Consider the following two statements:*

- 1133 • *For any deterministic Poissonized tester  $\mathcal{A}$  with sample complexity  $m$ , if  $\mathcal{A}$  is  $\delta$ -correct with respect  
1134 to  $\mathcal{M}_0, \mathcal{M}_\varepsilon$ , then  $\mathcal{A}$  cannot be  $\rho$ -replicable with respect to  $\mathcal{M}_\xi$  for  $\xi \sim \mathcal{U}([0, \varepsilon])$ .*
- 1135 • *For any randomized tester  $\mathcal{A}$  that consumes  $m' \leq m/10$  samples over  $\mathcal{X}$ , if  $\mathcal{A}$  is  $\delta/10$ -correct with  
1136 respect to  $\mathcal{M}_0$  and  $\mathcal{M}_\varepsilon$ , then  $\mathcal{A}$  cannot be  $\rho/10$ -replicable with respect to  $\mathcal{M}_\xi$  for  $\xi \sim \mathcal{U}([0, \varepsilon])$ .*

1137 *The first statement implies the second statement.*

1138 *Proof.* Let  $\mathcal{A}$  be a randomized tester that consumes  $m'$  samples. Consider the negation of the second  
1139 statement. In particular, assume that  $\mathcal{A}$  is  $\delta/10$ -correct with respect to  $\mathcal{M}_0$  and  $\mathcal{M}_\varepsilon$  as well as  $\rho/10$   
1140 replicable with respect to  $\mathcal{M}_\xi$  for  $\xi \sim \mathcal{U}[0, \varepsilon]$ . We show that this will contradict the first statement.

1141 By Markov's inequality, with probability at least  $2/3$  over the choice of the random string  $r$ , we have  
1142 that the induced deterministic tester  $\mathcal{A}(\cdot; r)$  is  $0.3\delta$ -correct with respect to  $\mathcal{M}_0$  and  $\mathcal{M}_\varepsilon$ . Similarly,  
1143 with probability at least  $2/3$  over the choice of  $r$ ,  $\mathcal{A}(\cdot; r)$  is  $0.3\rho$ -replicable with respect to  $\mathcal{M}_\xi$  for  
1144  $\xi \sim \mathcal{U}[0, \varepsilon]$ . By the union bound, with probability at least  $1/3$  over the choice of  $r$ ,  $\mathcal{A}(\cdot; r)$  is at  
1145 the same time  $0.3\rho$ -replicable with respect to  $\mathcal{M}_\xi$  for  $\xi \sim \mathcal{U}[0, \varepsilon]$ . and  $0.3\delta$ -correct with respect to  
1146  $\mathcal{M}_0, \mathcal{M}_\varepsilon$ .

1147 We will now convert the tester into a Poissonized one. In particular, consider the Poissonized tester  
1148  $\bar{\mathcal{A}}$  obtained as follows. We first take  $k \sim \text{Poi}(m)$  samples from the underlying distribution  $\mathbf{p}/\|\mathbf{p}\|_1$ .  
1149 If  $k \geq m'$ , we take the first  $k$  samples, and feed it to  $\mathcal{A}(\cdot; r)$ . If  $k < m'$ , we simply return reject.  
1150 Since we assume  $\|\mathbf{p}\|_1 \in (0.5, 2)$  and  $m \geq \log(10/\delta) + \log(10/\rho)$ , it then follows from standard  
1151 Poisson concentration that  $k \geq m$  with probability at least  $1 - \min(\delta, \rho)$ . In particular, this implies  
1152 that  $\bar{\mathcal{A}}$  is a Poissonized tester with sample complexity  $m$  that is at the same time  $0.4\rho$ -replicable and  
1153  $0.4\delta$ -correct with respect to  $\mathcal{M}_\xi$ . This therefore contradicts the first statement of the lemma.  $\square$

## 1154 E Omitted Proofs for Replicable Uniformity Testing Lower Bounds

1155 In this section, we provide the omitted proofs for replicable uniformity testing. We give the proofs of  
1156 Lemma 3.5, Lemma 3.9, Lemma 3.6, Proposition 3.4, and finally Theorem 1.3. Remark that since in  
1157 Section 3 we assumed that  $\bar{\Theta}(\sqrt{n}\epsilon^{-2}\rho^{-1})$  dominates  $\epsilon^{-2}\rho^{-2}$ , throughout this section we have the  
1158 implicit upper bound  $\sqrt{n}\epsilon^{-2}\rho^{-1} = \tilde{o}(n\epsilon^{-2})$ .

### 1159 E.1 Bounding the Average Acceptance Probability for Uniformity Testing

1160 In this subsection, we provide the proof of Lemma 3.5.

1161 At a high level, we appeal to the same argument as in [40] to analyze the expected acceptance  
1162 probability of the tester. The framework proceeds as follows. Fix any  $\epsilon_0 < \epsilon_1$  in  $[0, \epsilon]$  such that  
1163  $\epsilon_1 - \epsilon_0 < \epsilon\rho$ . Let  $X$  be an unbiased random bit,  $\tilde{\mathbf{p}} \sim \mathcal{M}_{\epsilon_X}$  be defined as in Definition 3.2, and  
1164  $T \sim \text{PoiS}(m, \tilde{\mathbf{p}})$  be defined as in Definition 3.1. Then, the mutual information between  $X$  and  
1165  $T$  is bounded from above by a function of the parameters  $m, n, \epsilon$ , and  $\rho$ , as stated formally in  
1166 Lemma E.1. Secondly, given the mutual information bound, we know that with limited amount of  
1167 samples, for any pair of  $\epsilon_0, \epsilon_1 \in [0, \epsilon]$  that are  $\rho\epsilon$  close to each other,  $\mathbb{E}_{\mathbf{p} \sim \mathcal{M}_{\epsilon_0}}[\text{Acc}_m(\mathbf{p}, \mathcal{A})]$  and  
1168  $\mathbb{E}_{\mathbf{p} \sim \mathcal{M}_{\epsilon_1}}[\text{Acc}_m(\mathbf{p}, \mathcal{A})]$  must be close to each other. See Lemma E.3 for the formal statement. Lastly,  
1169 given  $\mathcal{A}$  as above and is  $0.1$ -correct w.r.t.  $\mathcal{M}_0$  and  $\mathcal{M}_\varepsilon$ , then the acceptance probability function  
1170 should satisfy that  $\mathbb{E}_{\mathbf{p} \sim \mathcal{M}_0}[\text{Acc}_m(\mathbf{p}, \mathcal{A})] \geq 0.9$  and  $\mathbb{E}_{\mathbf{p} \sim \mathcal{M}_\varepsilon}[\text{Acc}_m(\mathbf{p}, \mathcal{A})] < 0.1$ . Thus, by the mean  
1171 value theorem there exists  $\xi^* \in (0, \epsilon)$  such that  $\mathbb{E}_{\mathbf{p} \sim \mathcal{M}_{\xi^*}}[\text{Acc}_m(\mathbf{p}, \mathcal{A})] = \frac{1}{2}$ . Furthermore, from the  
1172 above Lipschitzness of  $\mathbb{E}_{\mathbf{p} \sim \mathcal{M}_\xi}[\text{Acc}_m(\mathbf{p}, \mathcal{A})]$  in  $\xi$  we know that for at least  $\rho$  fraction of  $\xi \in [0, \epsilon]$ ,  
1173  $\mathbb{E}_{\mathbf{p} \sim \mathcal{M}_\xi}[\text{Acc}_m(\mathbf{p}, \mathcal{A})] \in (1/3, 2/3)$ , which concludes the proof of Lemma 3.5.

1174 We begin by showing the mutual information bound.

1175 **Lemma E.1** (Mutual Information Bound for Uniformity Testing Hard Instance). *Let  $m =$*   
 1176  *$o(n\varepsilon^{-2} \log^{-2} n)$ ,  $\epsilon_0 < \epsilon_1 \in [0, \epsilon]$  be such that  $\epsilon_1 - \epsilon_0 < \epsilon\rho$ ,  $X$  be an unbiased random bit,*  
 1177  *$\mathcal{M}_{\epsilon_X}$  be the distribution over measures defined as in Definition 3.2,  $\tilde{\mathbf{p}} \sim \mathcal{M}_{\epsilon_X}$ ,  $T \sim \text{PoiS}(m, \tilde{\mathbf{p}})$ .*  
 1178 *Then the mutual information  $I(X : T_1, \dots, T_n)$  satisfies:*

$$I(X : T_1, \dots, T_n) = O\left(\frac{m^2}{n} \epsilon^4 \rho^2 \log^4 n\right) + o(1).$$

1179

1180 *Proof of Lemma E.1.* Let  $\delta := \epsilon_1 - \epsilon_0 = O(\epsilon\rho)$ . Since  $M_i^l$ s are conditionally independent condi-  
 1181 tioned on  $X$ , we have that

$$I(X : T_1, \dots, T_n) \leq \sum_{i=1}^n I(X : T_i) = nI(X : T_1).$$

1182 Therefore, it suffices show that  $I(X : T_1) = O\left(\frac{m^2}{n^2} \epsilon^4 \rho^2 \log^4 n\right) + o\left(\frac{1}{n}\right)$ .

1183 We start by expanding the conditional probabilities of  $T_1$  conditioned on value of  $X$ .

$$T_1|(X=0) \sim \frac{1}{2} \text{Poi}\left(\frac{m}{n}(1+\epsilon_0)\right) + \frac{1}{2} \text{Poi}\left(\frac{m}{n}(1-\epsilon_0)\right),$$

1184 and similarly,

$$T_1|(X=1) \sim \frac{1}{2} \text{Poi}\left(\frac{m}{n}(1+\epsilon_1)\right) + \frac{1}{2} \text{Poi}\left(\frac{m}{n}(1-\epsilon_1)\right),$$

1185 then we can expand  $\Pr[T_1 = a|X=0]$  and  $\Pr[T_1 = a|X=1]$  accordingly. Indeed,

$$\begin{aligned} \Pr[T_1 = a|X=0] &= \frac{1}{2a!} \left(\frac{m}{n}\right)^a (1+\epsilon_0)^a \exp\left(-\frac{m}{n}(1+\epsilon_0)\right) + \frac{1}{2a!} \left(\frac{m}{n}\right)^a (1-\epsilon_0)^a \exp\left(-\frac{m}{n}(1-\epsilon_0)\right) \\ &= \frac{1}{2a!} \left(\frac{m}{n}\right)^a \exp\left(-\frac{m}{n}\right) \left(\exp\left(-\frac{m\epsilon_0}{n}\right) (1+\epsilon_0)^a + \exp\left(\frac{m\epsilon_0}{n}\right) (1-\epsilon_0)^a\right), \\ \Pr[T_1 = a|X=1] &= \frac{1}{2a!} \left(\frac{m}{n}\right)^a \exp\left(-\frac{m}{n}\right) \left(\exp\left(-\frac{m(\epsilon_0+\delta)}{n}\right) (1+\epsilon_0+\delta)^a + \exp\left(\frac{m(\epsilon_0+\delta)}{n}\right) (1-\epsilon_0-\delta)^a\right). \end{aligned}$$

1186 Since  $\delta = o(\epsilon)$ ,  $\Pr[T_1 = a|X=0] = \Theta(\Pr[T_1 = a|X=1])$ . By Claim A.2, it suffices to show  
 1187 that  $\bar{I} := \sum_a \frac{(\Pr[T_1=a|X=0] - \Pr[T_1=a|X=1])^2}{\Pr[T_1=a|X=0] + \Pr[T_1=a|X=1]} = O\left(\frac{m^2}{n^2} \epsilon^4 \rho^2 \log^4 n\right) + o\left(\frac{1}{n}\right)$ .

1188 Let

$$f_a(y) := \exp\left(-\frac{my}{n}\right) (1+y)^a + \exp\left(\frac{my}{n}\right) (1-y)^a. \quad (11)$$

1189 Then it holds

$$\bar{I} = O(1) \sum_{a=0}^{\infty} \frac{1}{a!} \left(\frac{m}{n}\right)^a \exp\left(-\frac{m}{n}\right) \frac{(f_a(\epsilon_0) - f_a(\epsilon_0 + \delta))^2}{f_a(\epsilon_0) + f_a(\epsilon_0 + \delta)} =: O(1) \sum_{a=0}^{\infty} \bar{I}_a,$$

1190 where for simplicity, denote  $\bar{I}_a := \frac{1}{a!} \left(\frac{m}{n}\right)^a \frac{(f_a(\epsilon_0) - f_a(\epsilon_0 + \delta))^2}{f_a(\epsilon_0) + f_a(\epsilon_0 + \delta)}$ . Then by the mean value theorem  $\bar{I}_a \leq$   
 1191  $\delta^2 \frac{\max_{y \in [\epsilon_0, \epsilon_0 + \delta]} \left(\frac{\partial}{\partial y} f_a(y)\right)^2}{f_a(\epsilon_0) + f_a(\epsilon_0 + \delta)}$ , whence to bound  $\bar{I}_a$  from above, it suffices to bound the denominator  
 1192 of RHS from below and the numerator of RHS from above separately. We next break into 3 cases  
 1193 depending on the size of  $\frac{m}{n}$ .

1194 **Case 1:** For the sublinear regime, i.e.,  $\frac{m}{n} \leq 1/2$ , we break into 3 cases depending on the value of  $a$ .

1195 when  $a = 0$ , applying the mean value theorem gives that  $|f_0(\epsilon_0) - f_0(\epsilon_0 + \delta)| \leq$   
 1196  $-\frac{m}{n} \delta \frac{2m(\epsilon_0 + \delta)}{n} \exp\left(\frac{m(\epsilon_0 + \delta)}{n}\right)$ . Since  $f_0(\epsilon_0) + f_0(\epsilon_1) = \Omega(1)$ , we have that  $\bar{I}_0 =$

1197  $O(1) (f_0(\epsilon_0) - f_0(\epsilon_0 + \delta))^2 = O\left(\frac{m^4}{n^4} \epsilon_0^2 \delta^2\right) = O\left(\frac{m^2}{n^2} \epsilon_0^2 \delta^2\right)$ .

1198 when  $a = 1$ ,

$$\begin{aligned}
& |f_1(\epsilon_0) - f_1(\epsilon_0 + \delta)| \\
& \leq |f_0(\epsilon_0) - f_0(\epsilon_0 + \delta)| \\
& + \left| \epsilon_0 \left( \exp\left(\frac{m\epsilon_0}{n}\right) - \exp\left(-\frac{m\epsilon_0}{n}\right) \right) - (\epsilon_0 + \delta) \left( \exp\left(-\frac{m(\epsilon_0 + \delta)}{n}\right) + \exp\left(\frac{m(\epsilon_0 + \delta)}{n}\right) \right) \right| \\
& \leq O\left(\frac{m^2}{n^2}\epsilon_0\delta\right) + \epsilon_0 \left| \exp\left(-\frac{m\epsilon_0}{n}\right) - \exp\left(-\frac{m(\epsilon_0 + \delta)}{n}\right) \right| + \epsilon_0 \left| \exp\left(\frac{m(\epsilon_0 + \delta)}{n}\right) - \exp\left(\frac{m\epsilon_0}{n}\right) \right| \\
& \quad + \delta \left| \exp\left(\frac{m(\epsilon_0 + \delta)}{n}\right) - \exp\left(-\frac{m(\epsilon_0 + \delta)}{n}\right) \right| \\
& = O\left(\frac{m}{n}\epsilon_0\delta\right). \tag{the mean value theorem}
\end{aligned}$$

1199 Combining with the fact that  $f_1(\epsilon_0) + f_1(\epsilon_1) = \Omega(1)$ , we have that  $\bar{I}_1 =$   
1200  $O(1)(f_1(\epsilon_0) - f_1(\epsilon_0 + \delta))^2 = O\left(\frac{m^2}{n^2}\epsilon^2\delta^2\right)$ .

1201 when  $a \geq 2$ ,

$$\begin{aligned}
\frac{\partial}{\partial y} f_a(y) &= -\frac{m}{n} \exp\left(-\frac{my}{n}\right) (1+y)^a + a(1+y)^{a-1} \exp\left(-\frac{my}{n}\right) \\
&\quad + \frac{m}{n} \exp\left(\frac{my}{n}\right) (1-y)^a - a(1-y)^{a-1} \exp\left(\frac{my}{n}\right).
\end{aligned}$$

1202 Before bounding  $\left|\frac{\partial}{\partial y} f_a(y)\right|$ , we introduce a technical claim that is helpful in the rest of the proof to  
1203 show the monotonicity of specific families of functions.

1204 **Claim E.2.** For  $a, b, s, d, x \in \mathbb{R}$ , when  $s + dx \geq 0$ , if  $dk \geq (\leq, \text{resp.}) b(s + dx)$  then  $\exp(a -$   
1205  $bx)(s + dx)^k$  is nondecreasing(nonincreasing, resp.) as a function of  $x$ .

1206 *Proof of Claim E.2.*  $\frac{\partial}{\partial x} (\exp(a - bx)(s + dx)^k) = \exp(a - bx)(s + dx)^{k-1}[dk - b(s + dx)]$ , then  
1207 if  $dk \geq b(s + dx)$ , we have that  $\frac{\partial}{\partial x} (\exp(a - bx)(s + dx)^k) \geq 0$ . Similar argument applies when  
1208  $dk \leq b(s + dx)$ .  $\square$

1209 When  $y \in [\epsilon_0, \epsilon_0 + \delta]$ , by Claim E.2, since  $a - 1 \geq 1 \geq (1 + y)\frac{m}{n}$ ,

$$\begin{aligned}
\left| \frac{\partial}{\partial y} f_a(y) \right| &\leq \exp\left(-\frac{my}{n}\right) \left[ \frac{m}{n} ((1+y)^a - (1-y)^a) + a((1+y)^{a-1} - (1-y)^{a-1}) \right] \\
&\leq \frac{m}{n} a(1+y)^{a-1} 2y + a(a-1)(1+y)^{a-2} 2y = O(2^a a^2 y).
\end{aligned}$$

1210 Thus, we have that  $\max_{y \in [\epsilon_0, \epsilon_0 + \delta]} \left( \frac{\partial}{\partial y} f_a(y) \right)^2 = \max_{y \in [\epsilon_0, \epsilon_0 + \delta]} (O(2^{2a} a^4 y^2)) = O(4^a a^4 \epsilon^2)$ .

1211 Since  $f_a(\epsilon_0) + f_a(\epsilon_0 + \delta) = \Omega(1)$ ,

$$\sum_{a=2}^{\infty} \bar{I}_a \leq O(\delta^2 \epsilon^2) \sum_{a=2}^{\infty} \frac{4^a a^4}{a!} \left(\frac{m}{n}\right)^a.$$

1212 Since  $\sum_{a=2}^{\infty} \frac{4^a a^4}{a!}$  is a converging series, it can be bounded by  $O(1)$ . Therefore,  $\sum_{a=2}^{\infty} \bar{I}_a \leq$   
1213  $O(\delta^2 \epsilon^2) \sum_{a=2}^{\infty} \left(\frac{m}{n}\right)^a = O\left(\frac{m^2}{n^2} \delta^2 \epsilon^2\right)$ .

1214 In conclusion, from the above three cases,  $\bar{I} = O\left(\frac{m^2}{n^2} \delta^2 \epsilon^2\right)$ .

1215 **Case 2:** For the superlinear regime when  $n/2 \leq m \leq o\left(\frac{n}{\epsilon^2 \log^2 n}\right)$ , we start by noticing that when  $a$   
1216 deviates far enough from  $\frac{m}{n}$ , the sum of all such  $\bar{I}_a$  is negligible. More specifically, let  $\lambda = \frac{m(1-\epsilon-\delta)}{n}$ ,



1217 and  $c > 0$  be a constant such that  $\exp\left(-\frac{x^2}{2(\lambda+x)}\right)\Big|_{x=c\log n\sqrt{m/n}} \leq \frac{1}{n^2}$  then by Lemma A.1,

$$\sum_{\substack{a \geq \lfloor \lambda + c \log n \sqrt{m/n} \rfloor \\ a \leq \lceil \lambda - c \log n \sqrt{m/n} \rceil}} \frac{(\Pr[T_1 = a|X = 0] - \Pr[T_1 = a|X = 1])^2}{\Pr[T_1 = a|X = 0] + \Pr[T_1 = a|X = 1]} = o\left(\frac{1}{n}\right).$$

1218 Therefore, to compute  $\bar{I}$ , it suffices to consider  $\bar{I}_a$  when  $a \in$   
 1219  $[\lambda - c \log n \sqrt{m/n}, \lambda + c \log n \sqrt{m/n}]$ . Instead of directly bounding  $|f_a(\epsilon_0) - f_a(\epsilon_1)|$ , we  
 1220 separate  $f_a(y)$  into parts. In particular, by the Taylor expansion of  $\exp(x)$

$$\begin{aligned} f_a(y) &= \exp\left(-\frac{m}{n}y + a \log(1+y)\right) + \exp\left(\frac{m}{n}y + a \log(1-y)\right) \\ &= 2 + a \log(1-y^2) + \sum_{i=2}^{\infty} \frac{1}{i!} \left( \left(-\frac{m}{n}y + a \log(1+y)\right)^i + \left(\frac{m}{n}y + a \log(1-y)\right)^i \right). \end{aligned}$$

1221 Define  $g_a(y) := a \log(1-y^2)$  and  $h_a(y) := \sum_{i=2}^{\infty} \frac{1}{i!} \left(-\frac{m}{n}y + a \log(1+y)\right)^i$ . Then it follows that  
 1222  $f_a(y) = 2 + g_a(y) + h_a(y) + h_a(-y)$ .

1223 On one hand,

$$\begin{aligned} |g_a(\epsilon_0) - g_a(\epsilon_1)| &= \left| a \log\left(\frac{1-\epsilon_0^2}{1-\epsilon_1^2}\right) \right| \leq a \left| 1 - \frac{1-\epsilon_0^2}{1-\epsilon_1^2} \right| \quad (\text{for } x \geq 1, |\log(x)| \leq x-1) \\ &= \frac{a}{1-\epsilon_1^2} (\epsilon_0 + \epsilon_1) |\epsilon_0 - \epsilon_1| \\ &= O\left(\frac{m}{n} \epsilon \delta \log n\right). \end{aligned} \tag{12}$$

1224 On the other hand,

$$\begin{aligned} \frac{\partial}{\partial y} h_a(y) &= \left(-\frac{m}{n} + \frac{a}{1+y}\right) \sum_{i=2}^{\infty} \frac{1}{(i-1)!} \left(-\frac{m}{n}y + a \log(1+y)\right)^{i-1} \\ &= \left(-\frac{m}{n} + \frac{a}{1+y}\right) \left(\exp\left(-\frac{m}{n}y\right) (1+y)^x - 1\right). \end{aligned}$$

1225 When  $y \in [\epsilon_0, \epsilon_1]$ ,

$$\begin{aligned} \left| -\frac{m}{n} + \frac{a}{1+y} \right| &\leq \left| -\frac{m}{n} + \frac{1}{1+y} \left( \frac{m}{n} (1-\epsilon_0-\delta) + c \log n \sqrt{m/n} \right) \right| \\ &\leq \left| \frac{-y-\epsilon_0-\delta}{1+y} \frac{m}{n} \right| + \frac{c}{1+y} \log n \sqrt{m/n} \\ &= O(1) \left( \frac{m}{n} \epsilon_0 + \log n \sqrt{m/n} \right) = O\left(\log n \sqrt{m/n}\right), \end{aligned}$$

1226 where the last equality follows from the fact that  $\sqrt{\frac{m}{n}} = o\left(\frac{1}{\epsilon \log n}\right) = o\left(\frac{\log n}{\epsilon}\right)$  implies that  
 1227  $\log n \sqrt{m/n} \gg \frac{m}{n} \epsilon$ . For  $|\exp\left(-\frac{m}{n}y\right) (1+y)^a - 1|$ , from Claim E.2, since  $a > m/n(1+y)$ ,  
 1228  $\exp\left(-\frac{m}{n}y\right) (1+y)^a$  nondecreasing and takes value 1 when  $y = 0$ . Therefore, we can remove  
 1229 absolute value directly, which gives that

$$\begin{aligned} \left| \exp\left(-\frac{m}{n}y\right) (1+y)^a - 1 \right| &\leq \left( \sum_{i=0}^{\infty} \frac{y^i}{i!} \right)^{-m/n} (1+y)^a - 1 \leq (1+y)^{-m/n} (1+y)^x - 1 \\ &\leq 2(1+y)^{\log n \sqrt{m/n}} - 1 \leq \sum_{k=1}^{\lceil \log n \sqrt{m/n} \rceil} \binom{\lceil \log n \sqrt{m/n} \rceil}{k} y^k \\ &\leq O(1) \sum_{k=1}^{\lceil \log n \sqrt{m/n} \rceil} \left( \frac{\epsilon e \log n \sqrt{m/n}}{k} \right)^k. \end{aligned}$$

1230 To show that  $O\left(\epsilon \log n \sqrt{m/n}\right)$  dominates the last term, it suffices to show that  $\frac{\epsilon e \log n \sqrt{m/n}}{k} = o(1)$   
 1231 i.e.  $\epsilon = o\left(\frac{1}{\log n \sqrt{m/n}}\right)$ , which is equivalent to showing that  $\sqrt{m/n} = o\left(\frac{1}{\log n \epsilon}\right)$ . This is true if  
 1232 and only if  $m = o\left(\frac{n}{\epsilon^2 \log^2 n}\right)$  as assumed in the premise.

1233 Therefore, we have that  $\max_{y \in [\epsilon_0, \epsilon_1]} \left| \frac{\partial}{\partial y} h_a(y) \right| = O\left(\epsilon \log^2 n \frac{m}{n}\right)$ . By the mean value theorem, we  
 1234 have that

$$|h_a(\epsilon_0) - h_a(\epsilon_1)| = O\left(\epsilon \log^2 n \frac{m}{n}\right), \quad (13)$$

1235 and

$$|h_a(-\epsilon_0) - h_a(-\epsilon_1)| = O\left(\epsilon \delta \log^2 n \frac{m}{n}\right). \quad (14)$$

1236 Combining Equation (12), Equation (13), and Equation (14), we have that

$$|f_a(\epsilon_0) - f_a(\epsilon_1)| = O\left(\epsilon \delta \log^2 n \frac{m}{n}\right). \quad (15)$$

1237 We now consider bounding from below the denominator  $f_a(\epsilon_0) + f_a(\epsilon_1)$ . Recall that from Equa-  
 1238 tion (11), we have that

$$f_a(y) = \exp\left(-\frac{my}{n}\right) (1+y)^a + \exp\left(\frac{my}{n}\right) (1-y)^a.$$

1239 Since  $1+x \geq \exp(x-x^2)$ , we have that  $(1+y)^a \geq \exp(ay-ay^2)$ . This implies that

$$\begin{aligned} f_a(\epsilon_0) + f_a(\epsilon_1) &\geq \Omega(1) \exp\left((\epsilon + \delta) \left(-\frac{m}{n} + a\right) - a(\epsilon + \delta)^2\right) \\ &= \Omega(1) \exp\left(-\frac{m}{n}(\epsilon + \delta)^2 - (\epsilon + \delta)c \log n \sqrt{m/n} - a(\epsilon + \delta)^2\right) \\ &= \Omega(1) \exp\left(-\frac{m}{n}\epsilon^2 - \epsilon \log n \sqrt{m/n} - \epsilon^2 \log n \sqrt{m/n}\right). \end{aligned}$$

1240 Since  $\frac{m}{n} = o\left(\frac{1}{\epsilon^2 \log^2 n}\right)$ , we have that

$$f_a(\epsilon_0) + f_a(\epsilon_1) \geq \Omega(1) \frac{1}{\exp(o(1))} = \Omega(1). \quad (16)$$

1241 Hence, by Equation (15) and Equation (16),

$$\begin{aligned} \bar{I} &= O(1) \sum_{a=0}^{\infty} \frac{1}{a!} \left(\frac{m}{n}\right)^a \exp\left(-\frac{m}{n}\right) \frac{(f_a(\epsilon_0) - f_a(\epsilon_0 + \delta))^2}{f_a(\epsilon_0) + f_a(\epsilon_0 + \delta)} \\ &= O\left(\epsilon^2 \delta^2 \log^4 n \frac{m^2}{n^2}\right) \sum_{\substack{a \geq \lfloor \lambda + c \log n \sqrt{m/n} \rfloor \\ a \leq \lceil \lambda - c \log n \sqrt{m/n} \rceil \\ a \in \mathbb{Z}}} \frac{1}{a!} \left(\frac{m}{n}\right)^a \exp\left(-\frac{m}{n}\right) + o\left(\frac{1}{n}\right). \end{aligned}$$

1242 Since  $\sum_{a=\lfloor \lambda + c \log n \sqrt{m/n} \rfloor}^{\lceil \lambda - c \log n \sqrt{m/n} \rceil} \frac{1}{a!} \left(\frac{m}{n}\right)^a < \sum_{a=0}^{\infty} \frac{1}{a!} \left(\frac{m}{n}\right)^a = \exp(m/n)$ , this term cancels out with the  
 1243 succeeding  $\exp(-m/n)$  term. Thus

$$\bar{I} \leq O\left(\epsilon^2 \delta^2 \log^4 n \frac{m^2}{n^2}\right) + o\left(\frac{1}{n}\right)$$

1244 as desired.

1245 The above 2 cases conclude the proof of Lemma E.1. □

1246 The second step of the framework is as follows.

1247 **Lemma E.3** (Lipschitzness of Expected Acceptance Probability). Assume that  $m = \tilde{o}(\sqrt{n}\epsilon^{-2}\rho^{-1})$ .  
 1248 Let  $\mathcal{A}$  be a deterministic tester that takes a sample-count vector over  $[n]$  as input. Let  $\epsilon_0 < \epsilon_1 \in [0, \epsilon]$   
 1249 be such that  $\epsilon_0 - \epsilon_1 \leq \epsilon\rho$ . Then it holds that

$$|\mathbb{E}_{\mathbf{p} \sim \mathcal{M}_{\epsilon_0}}[\text{Acc}_m(\mathbf{p}, \mathcal{A})] - \mathbb{E}_{\mathbf{p} \sim \mathcal{M}_{\epsilon_1}}[\text{Acc}_m(\mathbf{p}, \mathcal{A})]| < 0.1,$$

1250

1251 where  $\text{Acc}_m$  is the acceptance probability function defined as  $\text{Acc}_m(\mathbf{p}, \mathcal{A}) :=$   
 1252  $\Pr_{T \sim \text{PoiS}(m, \mathbf{p})}[\mathcal{A}(T) = \text{Accept}]$ .

1253 *Proof of Lemma E.3.* Assume for the sake of contradiction that  $|\mathbb{E}_{\mathbf{p} \sim \mathcal{M}_{\epsilon_0}}[\text{Acc}_m(\mathbf{p}, \mathcal{A})] -$   
 1254  $\mathbb{E}_{\mathbf{p} \sim \mathcal{M}_{\epsilon_1}}[\text{Acc}_m(\mathbf{p}, \mathcal{A})]| \geq 0.1$ . Let  $X$  be an unbiased random bit, and  $Y$  be the random variable  
 1255 defined as follows: let  $\mathbf{p} \sim \mathcal{M}_{\epsilon_X}$ ,  $T \sim \text{PoiS}(m, \mathbf{p})$ , then  $Y = 1$  if  $\mathcal{A}(T)$  accept,  $Y = 0$  otherwise.  
 1256 It follows from the definition and the assumption that  $\Pr[Y = 1|X = 0] = \mathbb{E}_{\mathbf{p} \sim \mathcal{M}_{\epsilon_0}}[\text{Acc}_m(\mathbf{p}, \mathcal{A})]$   
 1257 and  $\Pr[Y = 1|X = 1] = \mathbb{E}_{\mathbf{p} \sim \mathcal{M}_{\epsilon_1}}[\text{Acc}_m(\mathbf{p}, \mathcal{A})]$ , which implies a mutual information bound of  
 1258  $I(X : T) \geq I(X : Y) = \Omega(1)$ . This clearly contradicts the result from Lemma E.1, and hence  
 1259 concludes the proof of Lemma E.3.  $\square$

1260 We are ready to show the main result of this subsection.

1261 *Proof of Lemma 3.5.* Since  $\mathcal{A}$  is 0.1-correct w.r.t.  $\mathcal{M}_0$  and  $\mathcal{M}_\epsilon$ , we have that  
 1262  $\mathbb{E}_{\mathbf{p} \sim \mathcal{M}_0}[\text{Acc}_m(\mathbf{p}, \mathcal{A})] \geq 0.9$  and  $\mathbb{E}_{\mathbf{p} \sim \mathcal{M}_\epsilon}[\text{Acc}_m(\mathbf{p}, \mathcal{A})] < 0.1$ . Furthermore, since  
 1263  $\mathbb{E}_{\mathbf{p} \sim \mathcal{M}_\xi}[\text{Acc}_m(\mathbf{p}, \mathcal{A})]$  is a polynomial in  $\xi$ , it is continuous in  $\xi$ . Hence, by the mean value  
 1264 theorem, there exists  $\xi^* \in (0, \epsilon)$  such that  $\mathbb{E}_{\mathbf{p} \sim \mathcal{M}_{\xi^*}}[\text{Acc}_m(\mathbf{p}, \mathcal{A})] = 1/2$ . It follows immediately  
 1265 from E.3 that  $\forall \xi \in [\xi^* - \rho\epsilon, \xi^* + \rho\epsilon]$  we have that

$$\begin{aligned} \mathbb{E}_{\mathbf{p} \sim \mathcal{M}_\xi}[\text{Acc}_m(\mathbf{p}, \mathcal{A})] &\in (\mathbb{E}_{\mathbf{p} \sim \mathcal{M}_{\xi^*}}[\text{Acc}_m(\mathbf{p}, \mathcal{A})] - 0.1, \mathbb{E}_{\mathbf{p} \sim \mathcal{M}_{\xi^*}}[\text{Acc}_m(\mathbf{p}, \mathcal{A})] + 0.1) \\ &= (0.4, 0.6) \subset (1/3, 2/3). \end{aligned}$$

1266 In conclusion, if we uniformly at randomly select a  $\xi \in [0, \epsilon]$ , then once it falls in interval  $[\xi^* -$   
 1267  $\rho\epsilon, \xi^* + \rho\epsilon]$  of length  $2\rho\epsilon$ , which happens with probability  $2\rho\epsilon$ , we have that  $\mathbb{E}_{\mathbf{p} \sim \mathcal{M}_\xi}[\text{Acc}_m(\mathbf{p}, \mathcal{A})] \in$   
 1268  $(1/3, 2/3)$  as desired.  $\square$

## 1269 E.2 Concentration of Acceptance Probability

1270 In this subsection, we prove Lemma 3.6. Throughout this section we identify the Accept outcome  
 1271 with 1 so that  $\text{Acc}_m(\mathbf{p}, \mathcal{A}) = \Pr_{T \sim \text{PoiS}(m, \mathbf{p})}[\mathcal{A}(T) = \text{Accept}] = \mathbb{E}_{T \sim \text{PoiS}(m, \mathbf{p})}[\mathcal{A}(T)]$ .

1272 A key technical result in this section is to bound the mixing time of the random walk  $\mathbf{RW}_{m, \mathcal{M}_\xi}$ ,  
 1273 which we abbreviate as  $\mathbf{RW}_{m, \xi}$  within this section for convenience.

1274 **Lemma 3.8.** Let  $\xi \in (0, \epsilon)$  and  $m = \tilde{o}(n\epsilon^{-2})$ . Then  $\mathbf{RW}_{m, \xi}$  has mixing time  $\tau(\delta) = O(\log(n/\delta))$ .

1275 We analyze the transition probability of the random walk  $\mathbf{RW}_{m, \xi}$ . We first note that drawing  $\text{Poi}(m)$   
 1276 samples from  $\mathbf{p} \sim \mathcal{M}_\xi$  is equivalent as drawing  $\text{Poi}(m\mathbf{p}_i)$  samples from each bucket independently  
 1277 where  $p_i \in \{\frac{1+\xi}{n}, \frac{1-\xi}{n}\}$  is the mass of bucket  $i$  under the measure  $\mathbf{p}$ . Since the observed count of  
 1278 each bucket  $i \in [n]$  is independent, we may decompose the random walk  $\mathbf{RW}_{m, \xi}$  as a product of  $n$   
 1279 independent random walks.

1280 **Definition E.4.** The Coordinate Sample Random Walk  $\mathbf{RW}_{m, \xi, i}$  is defined on the graph whose vertex  
 1281 set is  $\mathbb{N}$  and transitions  $(T_1[i], T_2[i])$  are defined by the conditional distribution of  $T_2[i]$  given  $T_1[i]$   
 1282 induced by the joint distribution given by the following process:

- 1283 1. Choose  $\mathbf{p}_i \sim \{\frac{1+\xi}{n}, \frac{1-\xi}{n}\}$ .
- 1284 2.  $T_1[i], T_2[i]$  are sampled independently from  $\text{PoiS}(m, \mathbf{p}_i)$ .

1285 Given a sample count  $T[i]$ , we denote  $\mathbf{RW}_{m, \xi, i}^k(T[i])$  the random variable representing the outcome  
 1286 after  $k$  steps of random walk from  $T$ . For  $\mathbf{p}_i \geq 0$ , we denote by  $\mathbf{RW}_{m, \xi, i}^k(\mathbf{p}_i)$  the distribution of  
 1287  $\mathbf{RW}_{m, \xi, i}^k(T[i])$  where  $T[i] \sim \text{PoiS}(m, \mathbf{p}_i)$ .

1288 By independence, we have that

$$\mathbf{RW}_{m,\xi} = \prod_{i=1}^n \mathbf{RW}_{m,\xi,i}.$$

1289 For a sample  $T$ , let  $T[i]$  denote the empirical frequency of the  $i$ -th bucket in  $T$ . Let  $T_1 \sim$   
 1290  $\mathbf{RW}_{m,\xi,i}(T_0)$ . We can write the joint distribution of  $T_0, T_1$  as

$$\begin{aligned} \Pr(T_0[i] = a, T_1[i] = b) &= \frac{\left( e^{-2m(1+\xi)/n} \frac{((1+\xi)m/n)^{a+b}}{a!b!} + e^{-2m(1-\xi)/n} \frac{((1-\xi)m/n)^{a+b}}{a!b!} \right)}{2} \\ &= \frac{1}{2a!b!} e^{-2m/n} \left( \frac{m}{n} \right)^{a+b} \left( e^{-2\xi m/n} (1+\xi)^{a+b} + e^{2\xi m/n} (1-\xi)^{a+b} \right). \end{aligned}$$

1291 Furthermore, we have that

$$\begin{aligned} \Pr(T_0[i] = a) &= \sum_{b=0}^{\infty} \frac{\left( e^{-2(1+\xi)m/n} \frac{((1+\xi)m/n)^{a+b}}{a!b!} + e^{-2(1-\xi)m/n} \frac{((1-\xi)m/n)^{a+b}}{a!b!} \right)}{2} \\ &= \frac{e^{-(1+\xi)m/n} ((1+\xi)m/n)^a + e^{-(1-\xi)m/n} ((1-\xi)m/n)^a}{2a!} \\ &= \frac{1}{2a!} e^{-m/n} \left( \frac{m}{n} \right)^a \left( e^{-\xi m/n} (1+\xi)^a + e^{\xi m/n} (1-\xi)^a \right) \end{aligned}$$

1292 Combining the two gives that the probability of the transition  $P(a, b) := \Pr(T_1[i] = b | T_0[i] = a)$  is

$$\begin{aligned} P(a, b) &= \frac{\Pr(T_1[i] = b, T_0[i] = a)}{\Pr(T_0[i] = a)} \\ &= \frac{1}{b!} e^{-m/n} \left( \frac{m}{n} \right)^b \left( \frac{e^{-2\xi m/n} (1+\xi)^{a+b} + e^{2\xi m/n} (1-\xi)^{a+b}}{e^{-\xi m/n} (1+\xi)^a + e^{\xi m/n} (1-\xi)^a} \right). \end{aligned}$$

1293 This defines the random walk  $\mathbf{RW}_{m,\xi,i}$  for each  $i \in [n]$  with transition probabilities given above.  
 1294 Given  $\mathbf{RW}_{m,\xi,i}$  for all  $i$ , we can write the transition probability of  $\mathbf{RW}_{m,\xi}$  from  $a = (a_1, \dots, a_n)$   
 1295 to  $b = (b_1, \dots, b_n)$  as

$$\begin{aligned} \Pr(\mathbf{RW}_{m,\xi}(a) = b) &= \prod_{i=1}^n \Pr(T_1[i] = b_i | T_0[i] = a_i) \\ &= e^{-m} \prod_{i=1}^n \frac{1}{b_i!} \left( \frac{m}{n} \right)^{b_i} \left( \frac{e^{-2\xi m/n} (1+\xi)^{a_i+b_i} + e^{2\xi m/n} (1-\xi)^{a_i+b_i}}{e^{-\xi m/n} (1+\xi)^{a_i} + e^{\xi m/n} (1-\xi)^{a_i}} \right). \end{aligned}$$

1296 In particular, the stationary distribution of  $\mathbf{RW}_{m,\xi}$  is the vector  $\pi \in [m]^n$  given by

$$\begin{aligned} \pi((a_1, \dots, a_n)) &= \prod_{i=1}^n \Pr(T_0[i] = a_i) \\ &= e^{-m} \prod_{i=1}^n \frac{1}{2a_i!} \left( \frac{m}{n} \right)^{a_i} \left( e^{-\xi m/n} (1+\xi)^{a_i} + e^{\xi m/n} (1-\xi)^{a_i} \right). \end{aligned}$$

1297 It is not hard to see that our random walk is ergodic and reversible.

1298 **Lemma E.5.** *The random walk  $\mathbf{RW}_{m,\xi}$  is ergodic and reversible.*

1299 *Proof.* The random walk  $\mathbf{RW}_{m,\xi}$  is ergodic since every transition is possible (including self-loops).  
 1300 Furthermore,  $\mathbf{RW}_{m,\xi}$  is reversible since  $\pi(i)P(i,j)$  is a joint distribution that is the same as  
 1301  $\pi(j)P(j,i)$ .  $\square$

1302 We proceed to show that  $\mathbf{RW}_{m,\xi,i}$  mixes rapidly.

1303 **Lemma E.6.** *Suppose  $m = o(n/\varepsilon^2)$ . The random walk  $\mathbf{RW}_{m,\xi,i}$  has mixing time  $\tau(0.04) \leq 2$ .*

1304 *Proof.* Note that the random walk  $\mathbf{RW}_{m,\xi,i}$  has transition probabilities from  $Y_0 \geq 0$  to  $Y_1 \geq 0$  given  
 1305 by the conditional distribution induced by the following joint distribution.

- 1306 1. Let  $X \sim \{0, 1\}$  be a uniformly random bit.
- 1307 2. Independently sample  $Y_0, Y_1 \sim \text{Poi}(m(1 - \xi)/n)$  if  $X = 0$  and otherwise sample  $Y_0, Y_1 \sim$   
 1308  $\text{Poi}(m(1 + \xi)/n)$  if  $X = 1$ .

1309 A useful fact is that the total variation distance between  $\text{Poi}(m(1 - \xi)/n)$  and  $\text{Poi}(m(1 + \xi)/n)$  is  
 1310 small.

1311 **Claim E.7.** *Let  $\lambda_1 > \lambda_2 > 0$ . Let  $X \sim \text{Poi}(\lambda_1)$  and  $Y \sim \text{Poi}(\lambda_2)$ . Then*

$$d_{\text{TV}}(X, Y) \leq \sqrt{\frac{(\lambda_1 - \lambda_2)^2}{2\lambda_2}}.$$

1312 *Proof.* We begin by bounding the KL-divergence as

$$D_{\text{KL}} = \lambda_1 \log \frac{\lambda_1}{\lambda_2} + \lambda_2 - \lambda_1 \leq \lambda_1 \left( \frac{\lambda_1 - \lambda_2}{\lambda_2} \right) + \lambda_2 - \lambda_1 \leq \frac{(\lambda_1 - \lambda_2)^2}{\lambda_2}$$

1313 where we have used  $\log x \leq x - 1$  for  $x > 0$ . Now, using Pinsker's inequality, we can bound

$$d_{\text{TV}}(X, Y) \leq \sqrt{\frac{(\lambda_1 - \lambda_2)^2}{2\lambda_2}}.$$

1314 This concludes the proof of Claim E.7.  $\square$

1315 We handle the sub-linear and super-linear cases separately.

1316 **Sub-linear Case:**  $m \leq n$ . Note that Claim E.7 implies that the total variation distance between  
 1317  $Z_0 \sim \text{Poi}(m(1 - \xi)/n)$  and  $Z_1 \sim \text{Poi}(m(1 + \xi)/n)$  is at most

$$\sqrt{\frac{(2m\xi/n)^2}{2m(1 - \xi)/n}} \leq \sqrt{\frac{2m\xi^2/n}{1 - \xi}} \leq 2\xi.$$

1318 where in the final inequality we have used  $m/n \leq 1$  and  $1 - \xi > 0.5$ .

1319 Now consider a step of the random walk from initial state  $Y_0 = \ell$ . The distribution of  $Y_1$  is given by  
 1320 the mixture of two Poisson distributions

$$\Pr(Y_1 = k | Y_0 = \ell) = \Pr(X = 0 | Y_0 = \ell) \Pr(Z_0 = k) + \Pr(X = 1 | Y_0 = \ell) \Pr(Z_1 = k).$$

1321 The total variation distance between this distribution and the stationary distribution  $\pi$  is at most

$$\frac{1}{2} \sum_k |\Pr(Y_1 = k | Y_0 = \ell) - \pi(k)| \leq 2 \left| \Pr(X = 0 | Y_0 = \ell) - \frac{1}{2} \right| \xi \leq 2\xi.$$

1322 Now, consider a step from  $Y_1 = k$ . By the total variation distance bound, we can conclude that  
 1323 an algorithm cannot distinguish  $X = 0$  with advantage better than  $2\xi < 0.2$ . Therefore, we can  
 1324 bound  $0.3 \leq \Pr(X = 0 | Y_1 = k) \leq 0.7$  otherwise the algorithm that returns  $X$  with this conditional  
 1325 probability is a distinguisher. From our previous calculation we conclude that after two steps, the  
 1326 random walk mixes to within  $0.4\xi < 0.04$  of the stationary distribution.

1327 **Super-linear Case:**  $n \leq m = o\left(\frac{n}{\varepsilon^2}\right)$  Following similar arguments as in the sub-linear case,  
 1328 the total variation distance between  $Z_0, Z_1$  is at most  $o(1) < 0.1$ . As in the sub-linear case, no  
 1329 algorithm can distinguish  $X = 0$  with advantage better than the total variation distance 0.1. Since  
 1330  $\Pr(X = 0 | Y_1 = k) \leq 0.6$ , we can conclude that the random walk mixes within 0.01 of the stationary  
 1331 distribution in two steps. This concludes the proof of Lemma E.6.  $\square$

1332 Given Lemma E.6, we can bound the relaxation time of each coordinate random walk via Theo-  
 1333 rem A.10. In particular, we have that for  $\mathbf{RW}_{m,\xi,i}$ ,  $t_{\text{rel}} \leq \frac{\tau(\delta)}{\log(1/2\delta)} + 1$ . Combining this with  
 1334 Lemma E.6 gives that

$$t_{\text{rel}} \leq \frac{\tau(0.04)}{\log(1/0.08)} + 1 \leq \frac{2}{\log(1/0.08)} + 1 = O(1).$$

1335 We are now ready to bound the mixing time of the product random walk  $\mathbf{RW}_{m,\xi}$ .

1336 **Lemma E.8.** *Let  $m = o\left(\frac{n}{\varepsilon^2}\right)$ . Let  $\gamma(x) \sim \text{Poi}((1+\xi)m/n)$  or  $\gamma(x) \sim \text{Poi}((1-\xi)m/n)$  denote*  
 1337 *the initial distribution. Then, under either initial distribution  $\gamma$ ,  $\mathbf{RW}_{m,\xi,i}$  has mixing time:*

$$\tau_i(\delta) = O(\log(1/\delta)).$$

1338 *Proof.* Consider a coordinate random walk  $\mathbf{RW}_{m,\xi,i}$ . Let  $P$  denote the transition matrix and  $P^t$   
 1339 denote the transition matrix after  $t$  steps. Let  $\pi$  denote the stationary distribution. Recall that we have  
 1340 shown that  $\mathbf{RW}_{m,\xi,i}$  has constant relaxation time and therefore constant absolute spectral gap  $\lambda_*$ .  
 1341 Given either initial distribution  $\gamma(x)$ , our goal is to bound the quantity

$$\sum_y \left| \left( \sum_x \gamma(x) P^t(x, y) \right) - \pi(y) \right|.$$

1342 We begin with the following inequality that follows from the proof of Theorem 12.5 of [39]. For any  
 1343 two states  $x, y$ ,

$$\left| \frac{P^t(x, y)}{\pi(y)} - 1 \right| \leq \frac{\lambda_*^t}{\sqrt{\pi(x)\pi(y)}}.$$

1344 Multiplying both sides by  $\pi(y)\gamma(x)$  we obtain the inequality

$$|\gamma(x)P^t(x, y) - \gamma(x)\pi(y)| \leq \frac{\lambda_*^t \gamma(x) \sqrt{\pi(y)}}{\sqrt{\pi(x)}}.$$

1345 The next claim bounds the ratio between  $\gamma(x)$  and  $\pi(x)$ .

1346 **Claim E.9.** *For any  $x \geq 0$ ,*

$$\frac{\gamma(x)}{\pi(x)} \leq 2.$$

1347 *Proof.* Let  $Z_0 \sim \text{Poi}((1-\xi)m/n)$  and  $Z_1 \sim \text{Poi}((1+\xi)m/n)$ . Let  $\lambda_0, \lambda_1$  denote the means of  
 1348  $Z_0, Z_1$  respectively. First, we show that  $\gamma(x)/\pi(x)$  is bounded when  $\gamma \sim Z_0$ .

$$\begin{aligned} \frac{\Pr(Z_0 = x)}{(\Pr(Z_0 = x) + \Pr(Z_1 = x))/2} &= \frac{2 \Pr(Z_0 = x)}{\Pr(Z_0 = x) + \Pr(Z_1 = x)} \\ &\leq \frac{2 \Pr(Z_0 = x)}{\Pr(Z_0 = x)} = 2. \end{aligned}$$

1349 A similar argument holds for  $\gamma \sim Z_1$ . This concludes the proof of Claim E.9.  $\square$

1350 Continuing from our previous calculation, we obtain

$$|\gamma(x)P^t(x, y) - \gamma(x)\pi(y)| \leq \lambda_*^t \sqrt{2\gamma(x)\pi(y)}.$$

1351 Summing over  $x$ , applying the triangle inequality and noting that  $\sum_x \gamma(x) = 1$ , we now have

$$\left| \left( \sum_x \gamma(x) P^t(x, y) \right) - \pi(y) \right| \leq \lambda_*^t \sqrt{2\pi(y)} \sum_x \sqrt{\gamma(x)}.$$

1352 For the remainder of the proof, we will consider the sub-linear and super-linear cases separately.



1353 **Sub-linear Case:**  $m \leq n$  Since  $m \leq n$ , in both cases the Poisson distribution has parameter  
 1354  $\lambda \leq (1 + \xi) \leq 1.1$ . By standard Poisson concentration, for both  $i \in \{0, 1\}$

$$\Pr(Z_i > \lambda + t) < e^{-t^2/2(\lambda+t)} = e^{-\Omega(t)}.$$

1355 In particular,  $\gamma(x+2) < e^{-\Omega(x)}$  for all  $x$ . Therefore,

$$\sum_{x=0}^{\infty} \sqrt{\gamma(x)} \leq \sum_{x=0}^C \sqrt{\gamma(x)} + \sum_{x=C}^{\infty} \sqrt{\gamma(x)} = C + \sum_{x=C}^{\infty} e^{-\Omega(x/2-1)} = O(1)$$

1356 for some large enough absolute constant  $C$ . Here, we observe that for  $x \geq C$ ,  $e^{-\Omega(x/2-1)} < e^{-x/C'}$   
 1357 for some constant  $C'$  so that the second term is an infinite geometric series with ratio  $e^{-1/C'} < 1$ .  
 1358 Similarly, we can bound  $\sum_{y=0}^{\infty} \pi(y) = O(1)$ . Thus, to conclude we sum over  $y$  and note that

$$\sum_y \left| \left( \sum_x \gamma(x) P^t(x, y) \right) - \pi(y) \right| \leq \sqrt{2} \lambda_*^t \sum_y \sqrt{\pi(y)} \sum_x \sqrt{\gamma(x)} = O(\lambda_*^t).$$

1359 In particular, from the initial distribution  $\gamma$ , the random walk  $\mathbf{RW}_\xi$  mixes to  $\delta$  in time  $O(\log(1/\delta))$ .

1360 **Super-linear Case:**  $n < m \leq o(\frac{n}{\varepsilon^2})$  Recall that  $x, y \sim \text{Poi}(\lambda)$  for  $\lambda \in \{(1 + \xi)m/n, (1 - \xi)m/n\}$ . Using standard Poisson concentration (e.g. Lemma A.1) and noting that  $\lambda > 1 - \xi$ , we  
 1361 observe that for any  $x$ , we have  $\gamma(x) < e^{-\Omega(|x-\lambda|)}$ . As in the sub-linear case, we begin by bounding  
 1362  $\sum \sqrt{\gamma(x)}$  for initial distribution  $\gamma$ . For sufficiently large constant  $C$ , we can bound

$$\sum_{x=0}^{\infty} \sqrt{\gamma(x)} \leq \sum_{|x-\lambda| \leq C} \sqrt{\gamma(x)} + \sum_{|x-\lambda| > C} \sqrt{\gamma(x)} = O(1).$$

1364 As above, we observe that for large enough  $C$ ,  $\sum_{|x-\lambda| > C} \sqrt{\gamma(x)}$  can be decomposed into two  
 1365 geometric series with ratio strictly less than 1. Since  $\pi$  is a mixture of both  $\gamma$ , we have that  
 1366  $\sum_y \sqrt{\pi(y)} = O(1)$  as well. The conclusion then follows as in the sub-linear case. This concludes  
 1367 the proof of Lemma E.8.  $\square$

1368 *Proof of Lemma 3.8.* The proof follows immediately from Lemma E.8 and Lemma A.6.  $\square$

1369 We are now ready to show that the acceptance probability of the algorithm on sample drawn from  
 1370  $\text{PoiS}(m, \mathbf{p})$  for a random  $\mathbf{p} \sim \mathcal{M}_\xi$  is well concentrated assuming that the algorithm is sufficiently  
 1371 replicable in terms of the mixing time of the random walk.

1372 **Lemma E.10.** Let  $K = \tau(0.01)$  and  $\xi \in [0, \varepsilon]$ . Suppose  $\mathcal{A}$  is  $\frac{1}{10K}$ -replicable with respect to  $\mathcal{M}_\xi$ .  
 1373 Then,

$$\Pr_{\mathbf{p} \sim \mathcal{M}_\xi} \left( \left| \mathbb{E}_{T \sim \text{PoiS}(m, \mathbf{p})} [\mathcal{A}(T)] - \mathbb{E}_{\mathbf{p}' \sim \mathcal{M}_\xi, T' \sim \text{PoiS}(m, \mathbf{p}')} [\mathcal{A}(T')] \right| > \frac{1}{4} \right) \leq \frac{1}{2}.$$

1374 *Proof.* Consider the following sampling process:

- 1375 1. Sample  $\mathbf{p} \sim \mathcal{M}_\xi$ .
- 1376 2. Sample  $T_0 \sim \text{PoiS}(m, \mathbf{p})$ .
- 1377 3. For  $1 \leq k \leq K := \tau(0.01) = O(\log n)$ , sample  $T_k \sim \mathbf{RW}_{m, \xi}(T_{k-1})$ .

1378 From Lemma 3.9 we know that on average over  $\mathbf{p} \sim \mathcal{M}_\xi$ ,  $\mathcal{A}(T_0) = \mathcal{A}(T_1) = \dots = \mathcal{A}(T_K)$  with  
 1379 probability at least 0.9. By Markov's inequality, for  $\frac{1}{2}$ -fraction of  $S$ , we have that  $\mathcal{A}(T_0) = \mathcal{A}(T_1) =$   
 1380  $\dots = \mathcal{A}(T_k)$  with probability at least 0.8.

1381 We now argue that the distribution of  $T_k$  is 0.01-close to the distribution of  $T$  drawn from the stationary  
 1382 distribution  $\pi$  in total variation distance. Since  $\mathbf{RW}_{m, \xi}$  is a product random walk, Lemma A.6  
 1383 implies that it suffices to argue that each coordinate random walk  $\mathbf{RW}_{m, \xi, i}$  mixes to within  $\frac{0.01}{n}$   
 1384 of the stationary distribution on that coordinate in  $\tau_i(0.01/n)$  steps. Fix a coordinate  $i$ . Note that  
 1385  $T_0[i] \sim \text{Poi}((1 + \xi)m/n)$  or  $\text{Poi}((1 - \xi)m/n)$ . In either case, the initial distribution satisfies the

assumptions of Lemma E.8, so that after  $O(\log n)$  steps, the random walk  $\mathbf{RW}_{m,\xi,i}$  mixes to within  $\frac{0.01}{n}$  of the stationary distribution. Given that  $T_k$  is close to the stationary distribution, the data processing inequality says that the probability of acceptance under either distribution cannot differ by more than 0.01.

Here, recall that  $T' \sim \pi$  is given by  $T' \sim \mathbf{p}$  where  $\mathbf{p} \sim \mathcal{M}_\xi$ . In particular, since the stationary distribution is exactly the probability of a sample drawn from random  $\mathbf{p} \sim \mathcal{M}_\xi$ , we have that for  $\frac{1}{2}$ -fraction of  $S$ ,

$$\begin{aligned} \left| \mathbb{E}_{\substack{\mathbf{p} \sim \mathcal{M}_\xi \\ T_0 \sim \mathbf{p}}}(\mathcal{A}(T_0)) - \mathbb{E}_{T' \sim \pi}(\mathcal{A}(T')) \right| &\leq \left| \mathbb{E}_{\substack{\mathbf{p} \sim \mathcal{M}_\xi \\ T_0 \sim \mathbf{p}}}(\mathcal{A}(T_0)) - \mathbb{E}_{T_K \sim \mathbf{RW}_{m,\xi}^K(T_0)}(\mathcal{A}(T_K)) \right| \\ &\quad + \left| \mathbb{E}_{T_K \sim \mathbf{RW}_{m,\xi}^K(T_0)}(\mathcal{A}(T_K)) - \mathbb{E}_{T' \sim \pi}(\mathcal{A}(T')) \right| \\ &\leq 0.2 + 0.01 \\ &\leq \frac{1}{4}. \end{aligned}$$

□

We are now ready to prove the main lemma of this subsection.

*Proof of Lemma 3.6.* From Lemma 3.8 we note that the mixing time  $K = \tau(0.01) = O(\log n)$ . Then, since we assume that  $\mathcal{A}$  is  $(\log n)^{-2}$ -replicable with respect to  $\mathcal{M}_\xi$ , we have  $\mathcal{A}$  is  $\frac{1}{10K}$ -replicable. Applying Lemma E.10, we obtain the desired result noting that  $\text{Acc}_m(\mathbf{p}, \mathcal{A}) = \mathbb{E}_{T \sim \text{PoiS}(m, \mathbf{p})}[\mathcal{A}(T)]$ . □

### E.3 Random Walk Indistinguishability

In this subsection, we show that a moderately replicable tester in general cannot distinguish a sample from the outcome after one random walk step.

*Proof of Lemma 3.9.* We first show that

$$\sum_{i=1}^k \mathbb{E}_{\mathbf{p} \sim \mathcal{M}_\xi} \left[ \Pr_{T \sim \mathbf{RW}_{m,\xi}^{i-1}(\mathbf{p}), T' \sim \mathbf{RW}_{m,\xi}(T)} [\mathcal{A}(T) \neq \mathcal{A}(T')] \right] < k\kappa, \quad (17)$$

After that, the lemma will follow from Markov's inequality.

Note that if we sample  $\mathbf{p} \sim \mathcal{M}_\xi$ , and then  $T \sim \text{PoiS}(m, \mathbf{p})$ , we obtain exactly the stationary distribution of the random walk. Thus, the distribution of  $T \sim \mathbf{RW}_{m,\xi}^{i-1}(\mathbf{p})$ ,  $T' \sim \mathbf{RW}_{m,\xi}^i(\mathbf{p})$  is equivalent as  $\mathbf{p} \sim \mathcal{M}_\xi$ ,  $T \sim \text{PoiS}(m, \mathbf{p})$ ,  $T' \sim \mathbf{RW}_{m,\xi}(T)$ . If we focus on just the joint distribution of  $T, T'$ , by the definition of  $\mathbf{RW}_{m,\xi}$ , this is the same as  $T, T' \sim \text{PoiS}(m, \mathbf{p})$ , where  $\mathbf{p} \sim \mathcal{M}_\xi$ .

This therefore gives rise to the identity  $\mathbb{E}_{\mathbf{p} \sim \mathcal{M}_\xi} \left[ \Pr_{T \sim \mathbf{RW}_{m,\xi}^{i-1}(\mathbf{p}), T' \sim \mathbf{RW}_{m,\xi}(T)} [\mathcal{A}(T) \neq \mathcal{A}(T')] \right] = \Pr_{\mathbf{p} \sim \mathcal{M}_\xi, T, T' \sim \text{PoiS}(m, \mathbf{p})} [\mathcal{A}(T) \neq \mathcal{A}(T')] = \kappa$ . Summing over all  $i$  then concludes the proof of Equation (17) as well as Lemma 3.9. □

### E.4 Lower Bound for Poissonized Tester and Proof of Theorem 1.3

*Proof of Proposition 3.4.* By Lemma 3.5, with probability at least  $\Omega(\rho)$  over the choice of  $\xi$ , we have that

$$\mathbb{E}_{\mathbf{p} \sim \mathcal{M}_\xi} [\text{Acc}_m(\mathbf{p}, \mathcal{A})] \in (1/3, 2/3). \quad (18)$$

Conditioned on some  $\xi$  satisfying the above, we claim that we must have

$$\mathbb{E}_{\mathbf{p} \sim \mathcal{M}_\xi} \left[ \Pr_{T, T' \sim \text{PoiS}(m, \mathbf{p})} [\mathcal{A}(T) \neq \mathcal{A}(T')] \right] \geq \log^{-2} n. \quad (19)$$

1415 We will proceed by a proof of contradiction. Assume that the opposite of Equation (19) holds. In that  
 1416 case, Lemma 3.6 becomes applicable, which gives that

$$\Pr_{\mathbf{p} \sim \mathcal{M}_\xi} [|\text{Acc}_m(\mathbf{p}, \mathcal{A}) - \mathbb{E}_{\mathbf{p} \sim \mathcal{M}_\xi} [\text{Acc}_m(\mathbf{p}, \mathcal{A})]| > 1/4] \leq 1/2. \quad (20)$$

1417 Combining Equations (18) and (20) then gives that  $\text{Acc}_m(\mathbf{p}, \mathcal{A}) \in (1/3 - 1/4, 2/3 + 1/4)$   
 1418 with probability at least  $1/2$  when we choose  $\mathbf{p} \sim \mathcal{M}_\xi$ . Conditioned on such a  $\mathbf{p}$ , we  
 1419 immediately have that  $\Pr_{T, T' \sim \text{PoiS}(m, \mathbf{p})} [\mathcal{A}(T) \neq \mathcal{A}(T')] \geq \Omega(1)$ . This therefore implies  
 1420 that  $\mathbb{E}_{\mathbf{p} \sim \mathcal{M}_\xi} [\Pr_{T, T' \sim \text{PoiS}(m, \mathbf{p})} [\mathcal{A}(T) \neq \mathcal{A}(T')]] \geq \Omega(1)$ , which contradicts the assumption  
 1421  $\mathbb{E}_{\mathbf{p} \sim \mathcal{M}_\xi} [\Pr_{T, T' \sim \text{PoiS}(m, \mathbf{p})} [\mathcal{A}(T) \neq \mathcal{A}(T')]] \leq \log^{-2}(n)$ . This concludes the proof of Equation (19).

1422 Recall that the meta-distribution  $\mathcal{H}_U$  is precisely the distribution of  $\mathbf{p}$  if one first chooses  $\xi$  from  $[0, \varepsilon]$   
 1423 uniformly at random, and then chooses  $\mathbf{p} \sim \mathcal{M}_\xi$ . Thus, combining Equations (18) and (19) gives that

$$\Pr_{\mathbf{p} \sim \mathcal{H}_U} \left[ \Pr_{T, T' \sim \text{PoiS}(m, \mathbf{p})} [\mathcal{A}(T) \neq \mathcal{A}(T')] \right] \geq \Omega(\rho \log^{-2} n).$$

1424 Moreover,  $\|\mathbf{p}\|_1 \in (1 - \varepsilon, 1 + \varepsilon) \subseteq (0.5, 2)$  with high probability. This therefore concludes the proof  
 1425 of Proposition 3.4.  $\square$

1426 Our lower bound for replicable uniformity test easily follows from Proposition 3.4, and Lemma D.3.

1427 *Proof of Theorem 1.3.* Assume without loss of generality that  $m \geq \log(10/\delta) + \log(10 \log^2 n/\rho)$ .  
 1428 From Proposition 3.4, any deterministic Poissonized tester with sample complexity  $m =$   
 1429  $\tilde{o}(\sqrt{n} \varepsilon^{-2} \rho^{-1})$  that is 0.1-correct with respect to  $\mathcal{M}_0$  and  $\mathcal{M}_\varepsilon$  cannot be  $\rho \log^{-2} n$ -replicable with  
 1430 respect to  $\mathcal{H}_U$ . Furthermore, any  $\mathbf{p} \sim \mathcal{H}_U$  satisfies  $\|\mathbf{p}\|_1 \in (0.5, 2)$  with high probability. Thus, even  
 1431 conditioned on  $\mathbf{p} \sim \mathcal{H}_U$  satisfying the norm condition, the deterministic Poissonized tester cannot be  
 1432 both 0.1-correct and  $\ll \rho \log^{-2} n$ -replicable. The conclusion therefore follows from Lemma D.3 (i.e.  
 1433 any randomized tester that is 0.01-correct cannot be  $\rho/\text{polylog}(n)$ -replicable.  $\square$

## 1434 F Omitted Proofs for Replicable Closeness Testing Lower Bounds

1435 In this section, we give a sample complexity lower bound of  $\tilde{\Omega}(n^{2/3} \varepsilon^{-4/3} \rho^{-2/3} + \sqrt{n} \varepsilon^{-2} \rho^{-1} +$   
 1436  $\varepsilon^{-2} \rho^{-2})$  for replicable closeness testing.

1437 Note that closeness testing is at least as hard as uniformity testing (even when replicability is of  
 1438 concern). Hence, it remains for us to show a lower bound of  $\tilde{\Omega}(n^{2/3} \varepsilon^{-4/3} \rho^{-2/3})$ . Note that this  
 1439 term dominates exactly in the sub-linear regime so it suffices to prove a lower bound in the regime  
 1440  $m \ll n$ .

1441 We start by describing the hard instance for replicable closeness testing in this regime. In particular,  
 1442 we construct meta-distributions over pairs of non-negative measures that will be used as inputs to the  
 1443 closeness testing problem.

1444 **Definition F.1** (Closeness Test Hard Instance). *For  $\xi \in [0, \varepsilon]$ , we define  $\mathcal{N}_\xi$  to be the distribution*  
 1445 *over pairs of non-negative measures  $\mathbf{p}_\xi, \mathbf{q}_\xi$  generated as follows:  $\forall i \in [n]$*

$$(\mathbf{p}_\xi(i), \mathbf{q}_\xi(i)) = \begin{cases} \left( \frac{1-\varepsilon}{m}, \frac{1-\varepsilon}{m} \right) & w.p. \quad \frac{m}{n} \\ \left( \frac{2\varepsilon+\xi}{2(n-m)}, \frac{2\varepsilon-\xi}{2(n-m)} \right) & w.p. \quad \frac{n-m}{2n} \\ \left( \frac{2\varepsilon-\xi}{2(n-m)}, \frac{2\varepsilon+\xi}{2(n-m)} \right) & w.p. \quad \frac{n-m}{2n}. \end{cases} \quad (21)$$

1446 *The meta-distribution  $\mathcal{H}_C$  is the distribution over random pairs of non-negative measures  $(\mathbf{p}, \mathbf{q})$*   
 1447 *generated as follows: choose  $\xi$  uniformly at random from  $[0, \varepsilon]$ , and return  $(\mathbf{p}, \mathbf{q}) \sim \mathcal{N}_\xi$ .*

1448 Again, thanks to Lemma D.3, after fixing the hard instance to be  $\mathcal{H}_C$ , it then suffices for us to show  
 1449 sample complexity lower bounds against deterministic closeness tester  $\mathcal{A}$  within the Poisson sampling  
 1450 model.

1451 **Proposition F.2.** Let  $\mathcal{H}_C$  be the meta-distribution defined as in Definition F.1,  $\mathcal{A}$  be a deterministic  
 1452 tester that takes as input a sample count vectors  $T \in \mathbb{R}^{2n}$ ,<sup>5</sup> and  $m = \tilde{o}(n^{2/3}\epsilon^{-4/3}\rho^{-2/3} + n)$ . Then  
 1453 it holds

$$\Pr_{(\mathbf{p}, \mathbf{q}) \sim \mathcal{H}_C} \left[ \Pr_{T, T' \sim \text{PoiS}(m, \mathbf{p} \oplus \mathbf{q})} [\mathcal{A}(T) \neq \mathcal{A}(T')] \geq \log^{-2} n \text{ and } \|(\mathbf{p} \oplus \mathbf{q})/2\|_1 \in (0.5, 2) \right] \geq \rho.$$

1454 In the rest of the section, we focus on showing Proposition F.2.

1455 Define  $\text{Acc}_m(\mathbf{p}, \mathbf{q}, \mathcal{A}) := \Pr_{T \sim \text{PoiS}(m, \mathbf{p} \oplus \mathbf{q})} [\mathcal{A}(T) = \text{Accept}]$ . Similar to the argument for replicable  
 1456 uniformity testing lower bound, we begin by showing the intermediate result that the average  
 1457 acceptance probability  $\mathbb{E}_{(\mathbf{p}, \mathbf{q}) \sim \mathcal{N}_\xi} [\text{Acc}_m(\mathbf{p}, \mathbf{q}, \mathcal{A})]$  is close to 1/2 with probability at least  $\rho$  if  $\xi$  is  
 1458 chosen randomly from  $[0, \epsilon]$ .

### 1459 F.1 Bounding the Average Acceptance Probability for Closeness Testing

1460 We dedicate this section to show the following lemma.

1461 **Lemma F.3.** Let  $\mathcal{A}$  be a deterministic Poissonized tester that's 0.1-correct w.r.t.  $\mathcal{N}_\xi$ , then  
 1462  $\Pr_{\xi \sim \mathcal{U}([0, \epsilon])} [\mathbb{E}_{(\mathbf{p}, \mathbf{q}) \sim \mathcal{N}_\xi} [\text{Acc}_m(\mathbf{p}, \mathbf{q}, \mathcal{A})] \in (1/3, 2/3)] \geq \rho$  as long as  $m = o(n^{2/3}\epsilon^{-4/3}\rho^{-2/3} +$   
 1463  $n)$ .

1464 The argument again uses information theory and is similar to the proof of Lemma 3.5. We follow the  
 1465 road map similar to the one to show Lemma 3.5 in Appendix E.1, where the main difference is that  
 1466 we work with a different hard instance. We therefore present the needed lemmas without restating the  
 1467 outline.

1468 **Lemma F.4** (Mutual Information Bound for Closeness Testing Hard Instance). Let  $m < n/2$ ,  $\epsilon_0 <$   
 1469  $\epsilon_1 \in [0, \epsilon]$  be such that  $\epsilon_1 - \epsilon_0 < \epsilon\rho$ ,  $X$  be an unbiased random bit,  $(\tilde{\mathbf{p}}, \tilde{\mathbf{q}}) \sim \mathcal{N}_{\epsilon_X}$  be defined as in Def-  
 1470 inition F.1,  $T \sim \text{PoiS}(m, \tilde{\mathbf{p}} \oplus \tilde{\mathbf{q}})$  as in Proposition F.2 where  $(T_1^{\tilde{\mathbf{p}}}, T_2^{\tilde{\mathbf{p}}}, \dots, T_n^{\tilde{\mathbf{p}}}, T_1^{\tilde{\mathbf{q}}}, T_2^{\tilde{\mathbf{q}}}, \dots, T_n^{\tilde{\mathbf{q}}}) =$   
 1471  $T \in \mathbb{R}^{2n}$  where  $T_i^{\tilde{\mathbf{p}}}$  counts the occurrences of element  $i$  sampled from  $\tilde{\mathbf{p}}/\|\tilde{\mathbf{p}}\|_1$ ,  $T_i^{\tilde{\mathbf{q}}}$  counts the  
 1472 occurrences of element  $i$  sampled from  $\tilde{\mathbf{q}}/\|\tilde{\mathbf{q}}\|_1$ . Then

$$I(X : T_1^{\tilde{\mathbf{p}}}, \dots, T_n^{\tilde{\mathbf{p}}}, T_1^{\tilde{\mathbf{q}}}, \dots, T_n^{\tilde{\mathbf{q}}}) = O\left(\frac{m^3}{n^2}\epsilon^4\rho^2\right).$$

1473

1474 *Proof of Lemma F.4.* Denote  $\delta := \epsilon_1 - \epsilon_0 = O(\epsilon\rho)$ . Since  $(T_i, N_i)'$ s are conditionally independent  
 1475 on  $X$ , we have that

$$I(X : T_1^{\tilde{\mathbf{p}}}, \dots, T_n^{\tilde{\mathbf{p}}}, T_1^{\tilde{\mathbf{q}}}, \dots, T_n^{\tilde{\mathbf{q}}}) \leq \sum_{i=1}^n I(X : T_i^{\tilde{\mathbf{p}}}, T_i^{\tilde{\mathbf{q}}}) =: nI(X : T_1^{\tilde{\mathbf{p}}}, T_1^{\tilde{\mathbf{q}}}).$$

1476 Therefore, it suffices to show that  $I(X : T_1^{\tilde{\mathbf{p}}}, T_1^{\tilde{\mathbf{q}}}) = O\left(\frac{m^3}{n^2}\epsilon^2\delta^2\right)$ . We first note that

1477  $\Pr[T_1^{\tilde{\mathbf{p}}} = a, T_1^{\tilde{\mathbf{q}}} = b | X = 0] = \Theta(1) \Pr[T_1^{\tilde{\mathbf{p}}} = a, T_1^{\tilde{\mathbf{q}}} = b | X = 1]$  since  $\delta = o(\epsilon)$ . Therefore,

1478 by Claim A.2 it suffices to show that  $\bar{I} := \sum_a \frac{(\Pr[T_1^{\tilde{\mathbf{p}}} = a, T_1^{\tilde{\mathbf{q}}} = b | X = 0] - \Pr[T_1^{\tilde{\mathbf{p}}} = a, T_1^{\tilde{\mathbf{q}}} = b | X = 1])^2}{\Pr[T_1^{\tilde{\mathbf{p}}} = a, T_1^{\tilde{\mathbf{q}}} = b | X = 0] + \Pr[T_1^{\tilde{\mathbf{p}}} = a, T_1^{\tilde{\mathbf{q}}} = b | X = 1]} =$

<sup>5</sup>Note that a closeness tester  $\mathcal{A}$  should in principle receive two sets of samples (or two sample count vectors in the Poisson sampling model) — one from  $\mathbf{p}$  and the other from  $\mathbf{q}$ . However, it is not hard to see that do not lose any information if we simply concatenate the two sample count vectors together. For notational convenience, we denote by  $(\mathbf{p} \oplus \mathbf{q})$  the non-negative measures over  $[2n]$ , where the first  $n$  entries agree with  $\mathbf{p}$  and the last  $n$  entries agree with  $\mathbf{q}$ . Then the distribution over the concatenated sample count vectors is simply given by  $\text{Poi}(m, \mathbf{p} \oplus \mathbf{q})$ .

1479  $O\left(\frac{m^3}{n^3}\epsilon^2\delta^2\right)$ . We next expand  $\Pr\left[T_1^{\tilde{\mathbf{P}}} = a, T_1^{\tilde{\mathbf{Q}}} = b | X = 0\right]$ .

$$\begin{aligned}
& \Pr\left[T_1^{\tilde{\mathbf{P}}} = a, T_1^{\tilde{\mathbf{Q}}} = b | X = 0\right] \\
&= \frac{m}{n} \frac{1}{a!} (1 - \epsilon)^a \exp(-(1 - \epsilon)) \frac{1}{b!} (1 - \epsilon)^b \exp(-(1 - \epsilon)) \\
&\quad + \frac{n - m}{2n} \frac{1}{a!} \left(\frac{m(2\epsilon + \epsilon_0)}{2(n - m)}\right)^a \exp\left(-\frac{m(2\epsilon + \epsilon_0)}{2(n - m)}\right) \frac{1}{b!} \left(\frac{m(2\epsilon - \epsilon_0)}{2(n - m)}\right)^b \exp\left(-\frac{m(2\epsilon - \epsilon_0)}{2(n - m)}\right) \\
&\quad + \frac{n - m}{2n} \frac{1}{b!} \left(\frac{m(2\epsilon + \epsilon_0)}{2(n - m)}\right)^b \exp\left(-\frac{m(2\epsilon + \epsilon_0)}{2(n - m)}\right) \frac{1}{a!} \left(\frac{m(2\epsilon - \epsilon_0)}{2(n - m)}\right)^a \exp\left(-\frac{m(2\epsilon - \epsilon_0)}{2(n - m)}\right) \\
&= \frac{1}{a!b!} \left( \frac{m}{n} (1 - \epsilon)^{a+b} \exp(-2(1 - \epsilon)) + \frac{n - m}{2n} \left(\frac{m(2\epsilon + \epsilon_0)}{2(n - m)}\right)^a \left(\frac{m(2\epsilon - \epsilon_0)}{2(n - m)}\right)^b \exp\left(\frac{2m\epsilon}{n - m}\right) \right. \\
&\quad \left. + \frac{n - m}{2n} \left(\frac{m(2\epsilon + \epsilon_0)}{2(n - m)}\right)^b \left(\frac{m(2\epsilon - \epsilon_0)}{2(n - m)}\right)^a \exp\left(\frac{2m\epsilon}{n - m}\right) \right) =: f_{a,b}(\epsilon_0),
\end{aligned}$$

1480 Then it follows that

$$\bar{I} = O(1) \sum_{a,b \in \mathbb{Z}_{\geq 0}} \frac{1}{a!b!} \frac{(f_{a,b}(\epsilon_0) - f_{a,b}(\epsilon_1))^2}{f_{a,b}(\epsilon_0) + f_{a,b}(\epsilon_1)} =: O(1) \sum_{a,b \in \mathbb{Z}_{\geq 0}} \bar{I}_{a,b}$$

1481 where we denote  $\bar{I}_{a,b} := \frac{1}{a!b!} \frac{(f_{a,b}(\epsilon_0) - f_{a,b}(\epsilon_1))^2}{f_{a,b}(\epsilon_0) + f_{a,b}(\epsilon_1)}$ . To bound  $\bar{I}_{a,b}$ , we break into 3 cases regarding the  
1482 value of  $a$ .

1483 when  $a + b = 0$ , viz.  $a = b = 0$ ,  $\Pr\left[T_1^{\tilde{\mathbf{P}}} = 0, T_1^{\tilde{\mathbf{Q}}} = 0 | X = 0\right] = \Pr\left[T_1^{\tilde{\mathbf{P}}} = 0, T_1^{\tilde{\mathbf{Q}}} = 0 | X = 1\right] =$

1484  $\frac{m}{n} \exp(-2(1 - \epsilon)) + \frac{n - m}{n} \exp\left(\frac{2m\epsilon}{n - m}\right)$ . Therefore,  $\bar{I}_{0,0} = 0$ .

1485 when  $a + b = 1$ , wlog  $a = 0, b = 1$  (by the symmetry between  $a$  and  $b$ .) We have that

$$\begin{aligned}
& \Pr\left[T_1^{\tilde{\mathbf{P}}} = 0, T_1^{\tilde{\mathbf{Q}}} = 1 | X = 0\right] = \Pr\left[T_1^{\tilde{\mathbf{P}}} = 0, T_1^{\tilde{\mathbf{Q}}} = 1 | X = 1\right] = \\
&= \frac{m}{n} (1 - \epsilon) \exp(-2(1 - \epsilon)) + \frac{n - m}{2n} \left(\frac{m(2\epsilon - \epsilon_0)}{2(n - m)}\right) \exp\left(\frac{2m\epsilon}{n - m}\right) \\
&\quad + \frac{n - m}{2n} \left(\frac{m(2\epsilon + \epsilon_0)}{2(n - m)}\right) \exp\left(\frac{2m\epsilon}{n - m}\right) \\
&= \frac{m}{n} (1 - \epsilon) \exp(-2(1 - \epsilon)) + \frac{\epsilon m}{n} \exp\left(-\frac{2m\epsilon}{n - m}\right).
\end{aligned}$$

1486 Thus,  $\bar{I}_{0,1} = \bar{I}_{1,0} = 0$ .

1487 when  $a + b > 1$ , wlog  $a \leq b$ , then the denominator term  $f_{a,b}(\epsilon_0) + f_{a,b}(\epsilon_1) = \Omega\left(\frac{m}{n}(1 - \epsilon)^{a+b}\right)$ .  
 1488 On the other hand consider the numerator. When  $y \in [\epsilon_0, \epsilon_1]$ ,

$$\begin{aligned} \left| \frac{\partial}{\partial y} f_{a,b}(y) \right| &= \frac{n-m}{2n} \exp\left(-\frac{2m\epsilon}{n-m}\right) \cdot \\ &\left| \frac{m}{2(n-m)} \left( a \left( \frac{m(2\epsilon+y)}{2(n-m)} \right)^{a-1} \left( \frac{m(2\epsilon-y)}{2(n-m)} \right)^b - b \left( \frac{m(2\epsilon+y)}{2(n-m)} \right)^a \left( \frac{m(2\epsilon-y)}{2(n-m)} \right)^{b-1} \right) \right. \\ &\quad \left. + \frac{m}{2(n-m)} \left( b \left( \frac{m(2\epsilon+y)}{2(n-m)} \right)^{b-1} \left( \frac{m(2\epsilon-y)}{2(n-m)} \right)^a - a \left( \frac{m(2\epsilon+y)}{2(n-m)} \right)^b \left( \frac{m(2\epsilon-y)}{2(n-m)} \right)^{a-1} \right) \right| \\ &= \frac{m}{n} \frac{m}{2(n-m)} \epsilon^{a+b-1} \left| (2\epsilon+y)^{a-1} (2\epsilon-y)^{b-1} [2\epsilon(a-b) - y(a+b)] \right. \\ &\quad \left. + (2\epsilon+y)^{b-1} (2\epsilon-y)^{a-1} [2\epsilon(b-a) - y(a+b)] \right|. \end{aligned}$$

Let  $c > 1$  be such that  $n - m = \frac{1}{c}n$ , then

$$\begin{aligned} &= O(c^{a+b}) \left( \frac{m}{n} \right)^{a+b} [2\epsilon(b-a) | (2\epsilon+y)^{b-1} (2\epsilon-y)^{a-1} - (2\epsilon+y)^{a-1} (2\epsilon-y)^{b-1} | \\ &\quad + y(a+b) | (2\epsilon+y)^{b-1} (2\epsilon-y)^{a-1} + (2\epsilon+y)^{a-1} (2\epsilon-y)^{b-1} |] \\ &\leq O(c^{a+b}) \left( \frac{m}{n} \right)^{a+b} \epsilon(a+b) [(2\epsilon+y)^{b-1} (2\epsilon-y)^{a-1} + (2\epsilon+y)^{a-1} (2\epsilon-y)^{b-1}] \\ &= O\left((4c)^{a+b} \left( \frac{m}{n} \right)^{a+b} \epsilon^{a+b-1} (a+b)\right). \end{aligned}$$

1489 This implies that  $\forall a + b \geq 2$ ,  $\bar{I}_{a,b} = O\left(\frac{1}{a!b!} \left(\frac{(4c)^2}{1-\epsilon}\right)^{a+b} \left(\frac{m}{n}\right)^{2a+2b-1} \epsilon^{2(a+b-1)} (a+b)^2 \delta^2\right)$  then

$$\sum_{\substack{a,b \in \mathbb{Z}_{\geq 0} \\ a+b \geq 2 \\ a \leq b}} \bar{I}_{a,b} = O\left(\sum_{a=0}^{\infty} \frac{1}{a!} \left(\frac{(4c)^2}{1-\epsilon}\right)^a \sum_{\substack{b \geq a \\ b \geq 2-a}} \frac{1}{b!} \left(\frac{(4c)^2}{1-\epsilon}\right)^b \left(\frac{m}{n}\right)^{2a+2b-1} \epsilon^{2(a+b-1)} (a+b)^2 \delta^2\right),$$

1490 where  $\sum_{\substack{b \geq a \\ b \geq 2-a}} \frac{1}{b!} \left(\frac{(4c)^2}{1-\epsilon}\right)^b \leq \exp((4c)^2/(1-\epsilon))$  and the sum of infinite geometric series is domi-  
 1491 nated by the first term when common ratio  $< 1$ , we have that

$$\sum_{\substack{a,b \in \mathbb{Z}_{\geq 0} \\ a+b \geq 2 \\ a \leq b}} \bar{I}_{a,b} = O\left(\sum_{a=0}^{\infty} \frac{1}{a!} \left(\frac{(4c)^2}{1-\epsilon}\right)^a \left(\frac{m}{n}\right)^3 \epsilon^2 \delta^2\right) = O\left(\left(\frac{m}{n}\right)^3 \epsilon^2 \delta^2\right) = \sum_{\substack{a,b \in \mathbb{Z}_{\geq 0} \\ a+b \geq 2 \\ a \geq b}} \bar{I}_{a,b}$$

1492 as desired.

1493 In conclusion, from the above 3 cases we have that

$$\bar{I} \leq \bar{I}_{0,0} + \bar{I}_{0,1} + \bar{I}_{1,0} + \sum_{\substack{a,b \in \mathbb{Z}_{\geq 0} \\ a+b \geq 2 \\ a \geq b}} \bar{I}_{a,b} + \sum_{\substack{a,b \in \mathbb{Z}_{\geq 0} \\ a+b \geq 2 \\ a \leq b}} \bar{I}_{a,b} = O\left(\left(\frac{m}{n}\right)^3 \epsilon^2 \delta^2\right),$$

1494 which concludes the proof of Lemma F.4.  $\square$

1495 **Lemma F.5** (Lipchitzness of Expectation of Acceptance Probability Function). Assume that  $m =$   
 1496  $o(n^{2/3} \epsilon^{-4/3} \rho^{-2/3} + n)$ , and  $\mathcal{A}$  be a deterministic tester takes a sample-count vector over  $[n]$  as  
 1497 input and returns 1 if accept 0 otherwise, and recall the acceptance probability function is defined via  
 1498  $\text{Acc}_m(\mathbf{p}, \mathbf{q}, \mathcal{A}) := \Pr_{T \sim \text{PoiS}(m, \mathbf{p} \oplus \mathbf{q})} [\mathcal{A}(T) = \text{Accept}]$ . Let  $\epsilon_0 < \epsilon_1 \in [0, \epsilon]$  be such that  $\epsilon_1 - \epsilon_0 \leq \epsilon \rho$ .  
 1499 Then it holds that

$$|\mathbb{E}_{(\mathbf{p}, \mathbf{q}) \sim \mathcal{N}_{\epsilon_0}} [\text{Acc}_m(\mathbf{p}, \mathbf{q}, \mathcal{A})] - \mathbb{E}_{(\mathbf{p}, \mathbf{q}) \sim \mathcal{N}_{\epsilon_1}} [\text{Acc}_m(\mathbf{p}, \mathbf{q}, \mathcal{A})]| < 0.1$$

1500



1501 *Proof of Lemma F.5.* Assume the opposite  $|\mathbb{E}_{(\mathbf{p}, \mathbf{q}) \sim \mathcal{N}_{\epsilon_0}} [\text{Acc}_m(\mathbf{p}, \mathbf{q}, \mathcal{A})] -$   
1502  $\mathbb{E}_{(\mathbf{p}, \mathbf{q}) \sim \mathcal{N}_{\epsilon_1}} [\text{Acc}_m(\mathbf{p}, \mathbf{q}, \mathcal{A})]| \geq 0.1$ . Then, let  $X$  be an unbiased random bit, and  $Y$  be the  
1503 random variable defined as follows: let  $(\mathbf{p}, \mathbf{q}) \sim \mathcal{N}_{\epsilon_X}$ ,  $T \sim \text{PoiS}(m, \mathbf{p} \oplus \mathbf{q})$ , then  $Y = 1$  if  
1504  $\mathcal{A}(T)$  accept,  $Y = 0$  otherwise. From the definition, we notice that  $\Pr[Y = 1 | X = 0] =$   
1505  $\mathbb{E}_{(\mathbf{p}, \mathbf{q}) \sim \mathcal{N}_{\epsilon_0}} [\text{Acc}_m(\mathbf{p}, \mathbf{q}, \mathcal{A})]$  and  $\Pr[Y = 1 | X = 1] = \mathbb{E}_{(\mathbf{p}, \mathbf{q}) \sim \mathcal{N}_{\epsilon_1}} [\text{Acc}_m(\mathbf{p}, \mathbf{q}, \mathcal{A})]$ , which implies a  
1506 mutual information bound of  $I(X : T) = I(X : Y) = \Omega(1)$ . This contradicts with the result from  
1507 Lemma F.4.  $\square$

1508 We are now ready to prove Lemma F.3.

1509 *Proof of Lemma F.3.* Since  $\mathcal{A}$  is 0.1-correct w.r.t.  $\mathcal{N}_0$  and  $\mathcal{N}_\epsilon$ , we have that  
1510  $\mathbb{E}_{(\mathbf{p}, \mathbf{q}) \sim \mathcal{N}_0} [\text{Acc}_m(\mathbf{p}, \mathbf{q}, \mathcal{A})] \geq 0.9$  and  $\mathbb{E}_{(\mathbf{p}, \mathbf{q}) \sim \mathcal{N}_\epsilon} [\text{Acc}_m(\mathbf{p}, \mathbf{q}, \mathcal{A})] < 0.1$ . Furthermore, since  
1511  $\mathbb{E}_{(\mathbf{p}, \mathbf{q}) \sim \mathcal{N}_\xi} [\text{Acc}_m(\mathbf{p}, \mathbf{q}, \mathcal{A})]$  is a polynomial in  $\xi$ , it is continuous in  $\xi$ , then by mean value theorem  
1512 there exists  $\xi^* \in (0, \epsilon)$  such that  $\mathbb{E}_{(\mathbf{p}, \mathbf{q}) \sim \mathcal{N}_{\xi^*}} [\text{Acc}_m(\mathbf{p}, \mathbf{q}, \mathcal{A})] = 1/2$ . Immediately following from  
1513 Lemma F.5 that  $\forall \xi \in [\xi^* - \rho\epsilon, \xi^* + \rho\epsilon]$  we have that

$$\begin{aligned} \mathbb{E}_{(\mathbf{p}, \mathbf{q}) \sim \mathcal{N}_\xi} [\text{Acc}_m(\mathbf{p}, \mathbf{q}, \mathcal{A})] &\in \left( \mathbb{E}_{(\mathbf{p}, \mathbf{q}) \sim \mathcal{N}_{\xi^*}} [\text{Acc}_m(\mathbf{p}, \mathbf{q}, \mathcal{A})] - 0.1, \mathbb{E}_{(\mathbf{p}, \mathbf{q}) \sim \mathcal{N}_{\xi^*}} [\text{Acc}_m(\mathbf{p}, \mathbf{q}, \mathcal{A})] + 0.1 \right) \\ &= (0.4, 0.6) \subset (1/3, 2/3). \end{aligned}$$

1514 In conclusion, if we uniformly at randomly select a  $\xi \in [0, \epsilon]$ , then once it falls in interval  $[\xi^* -$   
1515  $\rho\epsilon, \xi^* + \rho\epsilon]$  of length  $2\rho\epsilon$  we have that  $\mathbb{E}_{(\mathbf{p}, \mathbf{q}) \sim \mathcal{N}_\xi} [\text{Acc}_m(\mathbf{p}, \mathbf{q}, \mathcal{A})] \in (1/3, 2/3)$  as desired.  $\square$

1516 Conditioned on some  $\xi$  satisfying the probabilistic condition in Lemma F.3, we then proceed to  
1517 show that the acceptance probability  $\text{Acc}_m(\mathbf{p}, \mathbf{q}, \mathcal{A})$  concentrates around the expected acceptance  
1518 probability  $\mathbb{E}_{(\mathbf{p}, \mathbf{q}) \sim \mathcal{N}_\xi} [\text{Acc}_m(\mathbf{p}, \mathbf{q}, \mathcal{A})]$ .

## 1519 F.2 Concentration of Acceptance Probabilities

1520 In this section we prove that the acceptance probabilities concentrate.

1521 **Lemma F.6** (Concentration of Acceptance Probabilities). *Let  $\xi \in (0, \epsilon)$  and  $\mathcal{A}$  be a deterministic*  
1522 *tester satisfying that is  $\log^{-2} n$ -replicable with respect to  $\mathcal{N}_\xi$ . Then it holds*

$$\Pr_{(\mathbf{p}, \mathbf{q}) \sim \mathcal{N}_\xi} \left( \left| \text{Acc}_m(\mathbf{p}, \mathbf{q}, \mathcal{A}) - \mathbb{E}_{(\mathbf{p}', \mathbf{q}') \sim \mathcal{N}_\xi} [\text{Acc}_m(\mathbf{p}', \mathbf{q}', \mathcal{A})] \right| > \frac{1}{4} \right) \leq \frac{1}{2}.$$

1523 This is achieved by analyzing the sample random walk  $\mathbf{RW}_{m, \mathcal{N}_\xi}$  analogous to the one considered in  
1524 the uniformity testing case.

1525 We begin by defining a random walk on samples drawn from distributions in  $\mathcal{N}_\xi$ .

1526 **Definition F.7.** *The Sample Random Walk  $\mathbf{RW}_{m, \xi}$  is defined on the graph with vertex set  $[m]^n \times [m]^n$*   
1527 *(where each vertex corresponds to a sample drawn from  $(\mathbf{p}_\xi, \mathbf{q}_\xi)$  and transitions  $(T_1, T_2)$  are defined*  
1528 *by the conditional distribution of  $T_2$  given  $T_1$  induced by the joint distribution given by the following*  
1529 *process:*

- 1530 1.  $(\mathbf{p}, \mathbf{q}) \sim \mathcal{N}_\xi$
- 1531 2.  $T_1, T_2$  are independently sampled from  $\text{PoiS}(m, \mathbf{p} \oplus \mathbf{q})$ .

1532 For any sample  $T$ , let  $\mathbf{RW}_\xi(T)$  be the random variable representing the next step of the random  
1533 walk from  $T$ .

1534 Given a sample  $T$ , we denote  $T_{\mathbf{p}}[i]$  (resp.  $T_{\mathbf{q}}[i]$ ) the frequency of bucket  $i$  from  $\mathbf{p}$  (resp.  $\mathbf{q}$ ). Let us  
1535 analyze the random walk  $\mathbf{RW}_{m, \xi}$ . As before, we have  $T_{\mathbf{p}}[i] \sim \text{Poi}(m\mathbf{p}_i)$  and  $T_{\mathbf{q}}[i] \sim \text{Poi}(m\mathbf{q}_i)$   
1536 independently for all  $i$ . Thus,  $\mathbf{RW}_{m, \xi}$  is the product of  $n$  independent random walks  $\mathbf{RW}_{m, \xi, i}$  on  
1537 vertex set  $[m] \times [m]$ . We describe  $\mathbf{RW}_{m, \xi}$  by describing each random walk  $\mathbf{RW}_{m, \xi, i}$ .

1538 If  $S, T$  are drawn from the joint distribution defining  $\mathbf{RW}_{m,\xi,i}$ ,

$$\begin{aligned}
& \Pr(S_{\mathbf{p}}[i] = a, T_{\mathbf{p}}[i] = b, S_{\mathbf{q}}[i] = c, T_{\mathbf{q}}[i] = d) \\
&= \frac{m e^{4(1-\varepsilon)} (1-\varepsilon)^{a+b+c+d}}{n \cdot a!b!c!d!} \\
&+ \frac{n-m}{2n} \left( \frac{e^{(2\varepsilon+\xi)m/(n-m)} \left( \frac{(2\varepsilon+\xi)m}{2(n-m)} \right)^{a+b}}{a!b!} \frac{e^{(2\varepsilon-\xi)m/(n-m)} \left( \frac{(2\varepsilon-\xi)m}{2(n-m)} \right)^{c+d}}{c!d!} \right. \\
&\quad \left. + \frac{e^{(2\varepsilon-\xi)m/(n-m)} \left( \frac{(2\varepsilon-\xi)m}{2(n-m)} \right)^{a+b}}{a!b!} \frac{e^{(2\varepsilon+\xi)m/(n-m)} \left( \frac{(2\varepsilon+\xi)m}{2(n-m)} \right)^{c+d}}{c!d!} \right) \\
&= \frac{m e^{4(1-\varepsilon)} (1-\varepsilon)^{a+b+c+d}}{n \cdot a!b!c!d!} + \frac{n-m}{2n} \left( \frac{m}{2(n-m)} \right)^{a+b+c+d} \frac{e^{4\varepsilon m/(n-m)}}{a!b!c!d!} f_{a,b,c,d}(\xi)
\end{aligned}$$

1539 where

$$f_{a+b,c+d}(\xi) = (2\varepsilon + \xi)^{a+b} (2\varepsilon - \xi)^{c+d} + (2\varepsilon - \xi)^{a+b} (2\varepsilon + \xi)^{c+d}.$$

1540 Similarly, we compute the marginal distribution as

$$\Pr(S_{\mathbf{p}}[i] = a, S_{\mathbf{q}}[i] = c) = \frac{m e^{2(1-\varepsilon)} (1-\varepsilon)^{a+c}}{n \cdot a!c!} + \frac{n-m}{2n} \left( \frac{m}{2(n-m)} \right)^{a+c} \frac{e^{2\varepsilon m/(n-m)}}{a!c!} f_{a,c}(\xi).$$

1541 To describe the random walk transition probability, we compute the conditional distribution

$$\begin{aligned}
P((a, c), (b, d)) &= \Pr(T_{\mathbf{p}}[i] = b, T_{\mathbf{q}}[i] = d \mid S_{\mathbf{p}}[i] = a, S_{\mathbf{q}}[i] = c) \\
&= \frac{\Pr(T_{\mathbf{p}}[i] = b, T_{\mathbf{q}}[i] = d, S_{\mathbf{p}}[i] = a, S_{\mathbf{q}}[i] = c)}{\Pr(S_{\mathbf{p}}[i] = a, S_{\mathbf{q}}[i] = c)}
\end{aligned}$$

1542 and note that as before, the stationary distribution is given by the probability vector  $\pi(a, c) =$   
1543  $\Pr(S_{\mathbf{p}}[i] = a, S_{\mathbf{q}}[i] = c)$ .

1544 Following identical arguments as Lemma 3.9, we show that over few steps of the random walk, the  
1545 outcome of the algorithm does not change significantly.

1546 **Lemma F.8.** *Let  $\mathcal{A}$  be  $1/(10K)$ -replicable with respect to  $\mathcal{N}_{\xi}$ . Let  $(\mathbf{p}, \mathbf{q}) \sim \mathcal{N}_{\xi}$  and  $T_0 \sim$   
1547  $\text{PoiS}(m, \mathbf{p} \oplus \mathbf{q})$ . For  $1 \leq k \leq K$ , let  $T_k \sim \mathbf{RW}_{m,\xi}(T_{k-1})$ . Then,*

$$\Pr_{T_0, \dots, T_K} \left( \bigcup_{k=1}^K \{\mathcal{A}(T_{k-1}) \neq \mathcal{A}(T_k)\} \right) < \frac{1}{10}.$$

1548 We now bound the mixing time of the random walk  $\mathbf{RW}_{m,\xi}$ . As in the argument for uniformity, we  
1549 begin by bounding the (constant) mixing time of a single coordinate.

1550 **Lemma F.9.** *Suppose  $m \leq n/10$ . The random walk  $\mathbf{RW}_{m,\xi,i}$  has mixing time  $\tau(0.11) = O(1)$ .*

1551 *Proof.* Let  $Y_0 = (\ell_1, \ell_2)$  denote the current step. Let  $X \sim \{A, B, C\}$  be drawn randomly with  
1552 probabilities  $\frac{m}{n}, \frac{n-m}{2n}, \frac{n-m}{2n}$  respectively. Let  $Z_1^A \sim \text{Poi}(1-\varepsilon), Z_1^B \sim \text{Poi}\left(\frac{(2\varepsilon+\xi)m}{2(n-m)}\right), Z_1^C \sim$   
1553  $\text{Poi}\left(\frac{(2\varepsilon-\xi)m}{2(n-m)}\right)$  and  $Z_2^A \sim \text{Poi}(1-\varepsilon), Z_2^B \sim \text{Poi}\left(\frac{(2\varepsilon-\xi)m}{2(n-m)}\right), Z_2^C \sim \text{Poi}\left(\frac{(2\varepsilon+\xi)m}{2(n-m)}\right)$ . The next  
1554 step of the random walk  $Y_1 \sim \mathbf{RW}_{m,\xi,i}(Y_0)$  is taken according to the distribution

$$\begin{aligned}
P((\ell_1, \ell_2), (k_1, k_2)) &= \Pr(X = A \mid Y_0 = (\ell_1, \ell_2)) \Pr(Z_1^A = k_1, Z_2^A = k_2) \\
&\quad + \Pr(X = B \mid Y_0 = (\ell_1, \ell_2)) \Pr(Z_1^B = k_1, Z_2^B = k_2) \\
&\quad + \Pr(X = C \mid Y_0 = (\ell_1, \ell_2)) \Pr(Z_1^C = k_1, Z_2^C = k_2).
\end{aligned}$$

1555 We show that regardless of the current state  $(\ell_1, \ell_2)$ , the random walk reaches state  $(0, 0)$  with  
 1556 reasonable probability. Since  $\varepsilon < 0.1$ ,

$$\begin{aligned}\Pr(Z_1^A = 0, Z_2^A = 0) &= \left( e^{-(1-\varepsilon)} \frac{(1-\varepsilon)^0}{0!} \right)^2 = e^{-2(1-\varepsilon)} \geq 0.13, \\ \Pr(Z_1^B = 0, Z_2^B = 0) &= e^{-\frac{(2\varepsilon+\xi)m}{2(n-m)}} e^{-\frac{(2\varepsilon-\xi)m}{2(n-m)}} = e^{-\frac{2\varepsilon m}{n-m}} \geq e^{-2\varepsilon} > 0.8, \\ \Pr(Z_1^C = 0, Z_2^C = 0) &> 0.8\end{aligned}$$

1557 where we have used  $m < n/10$  in the second bound. In particular, note that  $\frac{m}{n-m} \leq \frac{1}{9}$  (here  
 1558 we only use that  $1/9 < 1$ ). The last follows identically. Then, regardless of  $(\ell_1, \ell_2)$ , we have  
 1559  $P((\ell_1, \ell_2), (0, 0)) \geq 0.13$ . In particular, after  $O(1)$  steps, we can guarantee that with probability  
 1560 0.99 we reach the state  $(0, 0)$ . We can then assume without loss of generality that  $\ell_1 = \ell_2 = 0$ .

1561 We now examine the distribution of  $X$  conditioned on  $Y_0 = (0, 0)$ . First, note that

$$\begin{aligned}\Pr(Y_0 = (0, 0)) &= \frac{m}{n} e^{-2(1-\varepsilon)} + \frac{n-m}{2n} \left( e^{-2\varepsilon m/(n-m)} + e^{-2\varepsilon m/(n-m)} \right) \\ &= \frac{m}{n} e^{-2(1-\varepsilon)} + \frac{n-m}{n} e^{-2\varepsilon m/(n-m)}.\end{aligned}$$

1562 Then, we argue that distribution of  $X$  conditioned on  $Y_0 = (0, 0)$  is reasonably random.

$$\begin{aligned}\Pr(X = B \mid Y_0 = (0, 0)) &= \frac{\Pr(X = B, Y_0 = (0, 0))}{\Pr(Y_0 = (0, 0))} \\ &= \frac{\frac{n-m}{2n} e^{-2\varepsilon/(n-m)}}{\frac{m}{n} e^{-2(1-\varepsilon)} + \frac{n-m}{n} e^{-2\varepsilon/(n-m)}} \\ &= \frac{1/2}{\frac{m}{n-m} \exp\left(\frac{2\varepsilon m}{n-m} - 2(1-\varepsilon)\right) + 1}.\end{aligned}$$

1563 Observe  $\frac{m}{10n} \leq \frac{m}{n} \exp(-2) \leq \frac{m}{n-m} \exp\left(\frac{2\varepsilon m}{n-m} - 2(1-\varepsilon)\right) \leq \frac{2m}{n} \exp\left(\frac{\varepsilon}{9} - 1.8\right) \leq \frac{m}{n}$  so that  
 1564 applying  $0.5 - x \leq \frac{0.5}{1+x} \leq 0.5 - x/3$  for small  $x > 0$ ,

$$0.5 - \frac{m}{n} \leq \Pr(X = B \mid Y_0 = (0, 0)) \leq 0.5 - \frac{m}{30n}.$$

1565 As a result, we can conclude

$$\frac{m}{15n} \leq \Pr(X = A \mid Y_0 = (0, 0)) \leq \frac{2m}{n}.$$

1566 In the stationary distribution, we have

$$\Pr(X = A) = \frac{m}{n}, \quad \Pr(X = B) = \Pr(X = C) = \frac{n-m}{2n}.$$

1567 In particular, the total variation distance between  $X$  in the stationary distribution and  $X$  conditioned  
 1568 on  $Y_0 = (0, 0)$  is at most  $\frac{m}{n} \leq \frac{1}{10}$  using our assumption  $m \leq n/10$ . Thus, from initial state  $(0, 0)$ ,  
 1569 the random walk mixes to within 0.1 total variation distance to the stationary distribution. We union  
 1570 bound with the 0.01 probability of not reaching the stationary distribution in  $O(1)$  steps to conclude  
 1571 the argument.  $\square$

1572 Thus, we can bound the relaxation time of  $\mathbf{RW}_{m,\xi,i}$  as

$$t_{\text{rel}} \leq \frac{\tau(0.11)}{\log(1/0.22)} + 1 = O(1).$$

1573 We now bound the mixing time from the initial distribution.

1574 **Lemma F.10.** *Let  $m \leq n/10$ . Let  $\gamma(x) \sim \text{Poi}(1-\varepsilon) \otimes \text{Poi}(1-\varepsilon)$ ,  $\gamma(x) \sim \text{Poi}\left(\frac{(2\varepsilon+\xi)m}{2(n-m)}\right) \otimes$   
 1575  $\text{Poi}\left(\frac{(2\varepsilon-\xi)m}{2(n-m)}\right)$ , or  $\gamma(x) \sim \text{Poi}\left(\frac{(2\varepsilon-\xi)m}{2(n-m)}\right) \otimes \text{Poi}\left(\frac{(2\varepsilon+\xi)m}{2(n-m)}\right)$  denote the initial distribution. The  
 1576 random walk  $\mathbf{RW}_{m,\xi,i}$  has mixing time  $\tau(\delta) = O(\log(n/\delta))$ .*

1577 *Proof.* As in Lemma E.8, we begin with following the inequality for any pair of states  $x = (x_1, x_2)$   
 1578 and  $y = (y_1, y_2)$ .

$$|\gamma(x)P^t(x, y) - \gamma(x)\pi(y)| \leq \frac{\lambda_*^t \gamma(x) \sqrt{\pi(y)}}{\sqrt{\pi(x)}}.$$

1579 We bound the ratio  $\gamma(x)/\pi(x)$ .

1580 **Claim F.11.** For all states  $x = (x_1, x_2)$ ,

$$\frac{\gamma(x)}{\pi(x)} \leq \frac{n}{m}.$$

1581 *Proof.* We split into the cases  $\gamma \sim Z^A, \gamma \sim Z^B, \gamma \sim Z^C$  as defined in Lemma F.9. First, we write

$$\pi(x) = \frac{m}{n} \Pr(Z^A = x) + \frac{n-m}{2n} \Pr(Z^B = x) + \frac{n-m}{2n} \Pr(Z^C = x)$$

1582 Then

$$\begin{aligned} \frac{\Pr(Z^A = x)}{\pi(x)} &\leq \frac{\Pr(Z^A = x)}{\frac{m}{n} \Pr(Z^A = x)} \leq \frac{n}{m} \\ \frac{\Pr(Z^B = x)}{\pi(x)} &\leq \frac{\Pr(Z^B = x)}{\frac{n-m}{2n} \Pr(Z^B = x)} \leq \frac{2n}{n-m} \leq 4 \\ \frac{\Pr(Z^C = x)}{\pi(x)} &\leq 4 \end{aligned}$$

1583 where in the second and third cases we used  $n-m \geq n/2$ . Finally, we conclude by observing  
 1584  $\frac{n}{m} \geq 4$ .  $\square$

1585 Then, we sum over  $x$  to observe

$$\left| \left( \sum_x \gamma(x) P^t(x, y) \right) - \pi(y) \right| \leq \lambda_*^t \sqrt{\frac{n}{m} \pi(y)} \sum_x \sqrt{\gamma(x)}.$$

1586 We now bound  $\sum_x \sqrt{\gamma(x)}$ . In all three cases  $Z^A, Z^B, Z^C$ , we have that the Poisson distribution (in  
 1587 both distributions) has parameter  $\lambda \leq 1$ . By standard Poisson concentration, for any  $i \in \{1, 2\}$  and  
 1588  $D \in \{A, B, C\}$  we have

$$\Pr(Z_i^D > x) = \Pr(Z_i^D > \lambda + (x-1)) = e^{-\Omega(x-1)}.$$

1589 Then, we bound for any  $X \in \{A, B, C\}$

$$\begin{aligned} \sum_x \sqrt{\gamma(x)} &= \sum_{x_1=0}^{\infty} \sum_{x_2=0}^{\infty} \sqrt{\Pr(Z_1^X = x_1) \Pr(Z_2^X = x_2)} \\ &= \sum_{x_1=0}^{\infty} \sqrt{\Pr(Z_1^X = x_1)} \sum_{x_2=0}^{\infty} \sqrt{\Pr(Z_2^X = x_2)} \\ &= O(1). \end{aligned}$$

1590 where the first equality follows by definition of  $\gamma$  and independence of  $\mathbf{p}, \mathbf{q}$ , and the second and  
 1591 third equalities follow as  $\sum_x \sqrt{\Pr(Z_i^X = x)}$  converges absolutely, which we showed in Lemma E.8.  
 1592 Thus, we arrive at the inequality

$$\left| \left( \sum_x \gamma(x) P^t(x, y) \right) - \pi(y) \right| = O \left( \lambda_*^t \sqrt{\frac{n}{m} \pi(y)} \right).$$

1593 Summing over  $y$  and applying a similar argument (see Lemma E.8 for details), we obtain

$$\sum_y \left| \left( \sum_x \gamma(x) P^t(x, y) \right) - \pi(y) \right| = O \left( \lambda_*^t \sqrt{\frac{n}{m}} \right).$$

1594 Thus, since  $\lambda_* < 1$  is an absolute constant less than 1, we conclude that from any of the three initial  
1595 distributions, the random walk  $\mathbf{RW}_{m,\xi,i}$  mixes to within  $\delta$  of the stationary distribution in time  
1596  $\tau(\delta) = O(\log((n/m)/\delta)) = O(\log(n/\delta))$ .

1597 □

1598 Now, using identical arguments as in Lemma E.10, we can conclude with the following lemma.

1599 **Lemma F.12.** *Let  $K = \tau(0.01)$  and  $\xi \in [0, \varepsilon]$ . Suppose  $\mathcal{A}$  is  $\frac{1}{10K}$ -replicable with respect to  $\mathcal{N}_\xi$ .*  
1600 *Then,*

$$\Pr_{(\mathbf{p}, \mathbf{q}) \sim \mathcal{N}_\xi} \left( \left| \mathbb{E}_{T \sim (\mathbf{p}, \mathbf{q})} [\mathcal{A}(T)] - \mathbb{E}_{(\mathbf{p}_2, \mathbf{q}_2) \sim \mathcal{N}_\xi, T' \sim (\mathbf{p}_2, \mathbf{q}_2)} [\mathcal{A}(T')] \right| > \frac{1}{4} \right) \leq \frac{1}{2}.$$

1601 We now prove Lemma F.6.

1602 *Proof.* From Lemma F.10, we have that  $\tau(0.01/n) = O(\log n)$ . Since  $\mathcal{A}$  is  $\log^{-2} n$ -replicable, it is  
1603 also  $1/(10K)$ -replicable. The conclusion follows. □

### 1604 F.3 Proof of Proposition F.2 and Theorem 1.4

1605 Combining Lemma F.3 and Lemma F.6 then yields the proof of Proposition F.2.

1606 *Proof of Proposition F.2.* The proof follows using analogous arguments as Proposition 3.4, applying  
1607 Lemma F.3 and Lemma F.6 where appropriate. □

1608 We are ready to prove Theorem 1.4. The theorem follows from Proposition F.2 and Lemma D.3.

1609 *Proof of Theorem 1.4.* Note that a lower bound of  $\tilde{\Omega}(\sqrt{n}\varepsilon^{-2}\rho^{-1} + \varepsilon^{-2}\rho^{-2})$  follows immediately  
1610 from lower bounds for uniformity testing and bias estimation respectively. It suffices to show a lower  
1611 bound of  $\tilde{\Omega}(n^{2/3}\varepsilon^{-4/3}\rho^{-2/3})$ .

1612 Proposition F.2 says that any deterministic tester that is 0.01-correct takes Poissonized samples with  
1613 sample complexity  $m = \tilde{o}(n^{2/3}\varepsilon^{-4/3}\rho^{-2/3})$  is not  $\rho/(\log n)^2$ -replicable with respect to the hard  
1614 instance  $\mathcal{H}_C$ . Then, from Lemma D.3 we may conclude that any randomized tester with fixed sample  
1615 complexity  $m = \tilde{o}(n^{2/3}\varepsilon^{-4/3}\rho^{-2/3})$  is not  $\rho/\text{polylog}(n)$ -replicable with respect to  $\mathcal{H}_C$ , concluding  
1616 the proof. □
